# Supplementary material
Source: PubMed Central journal article supplement (PMC2620715)
Supplement: supp_75_2_366__1.pdf [file supp_75_2_366__1.pdf]

| GI Number                                                                                 | Protein Name                                                                                                                         | Protein Probability F2365 | Protein Probability EGD | F2365 Sum of Xcours | F2365 Peptide Number | EGD Sum of Xcours | EGD Peptide Number | p Value (ANOVA) | List/Category |
|-------------------------------------------------------------------------------------------|--------------------------------------------------------------------------------------------------------------------------------------|---------------------------|-------------------------|---------------------|----------------------|-------------------|--------------------|-----------------|---------------|
| 46906236                                                                                  | diphosphoglycerate decarboxylase [Listeria monocytogenes str. 4b F2365]                                                              | 1E-42                     | 1E-24                   | 37.193              | 21                   | 21.68             | 12                 | 0.01447         | 2.4           |
| 46906268                                                                                  | amino acid permease family protein [Listeria monocytogenes str. 4b F2365]                                                            | 0.000001                  |                         | 6.213               | 3                    | 0                 | 0                  | 1.96E-05        | 1.2           |
| 46906343                                                                                  | nitroreductase family protein [Listeria monocytogenes str. 4b F2365]                                                                 | 0.000001                  |                         | 5.482               | 3                    | 0                 | 0                  | 4.61E-06        | 1.4           |
| 46906464                                                                                  | putative ATP-activated phosphotransferase [Listeria monocytogenes str. 4b F2365]                                                     | 0.00000001                |                         | 6.566               | 4                    | 0                 | 0                  | 1.69E-08        | 2.2           |
| 46906468                                                                                  | 2-C-methyl-D-erythritol 4-phosphate cydyltransferase [Listeria monocytogenes str. 4b F2365]                                          | 0.00000001                |                         | 6.228               | 4                    | 0                 | 0                  | 5.33E-07        | 1.1           |
| 46906565                                                                                  | leucine rich repeat domain [LPXTG-motif cell wall anchor domain protein [Listeria monocytogenes str. 4b F2365]                       | 1E-14                     | 0.0001                  | 12.674              | 7                    | 3.312             | 2                  | 0.00236         | 1.8           |
| 46906571                                                                                  | hypothetical protein LMO02365_0351 [Listeria monocytogenes str. 4b F2365]                                                            | 1E-40                     | 1E-16                   | 33.827              | 20                   | 13.949            | 8                  | 0.000277        | 6             |
| 46906572                                                                                  | hypothetical protein LMO02365_0352 [Listeria monocytogenes str. 4b F2365]                                                            | 0.000001                  |                         | 7.182               | 3                    | 0                 | 0                  | 0.000345        | 5.1           |
| 46906602                                                                                  | hypothetical protein LMO02365_0383 [Listeria monocytogenes str. 4b F2365]                                                            | 1E-10                     | 0.01                    | 11.687              | 5                    | 2.857             | 1                  | 0.03232         | 3.5           |
| 46906611                                                                                  | hypothetical protein LMO02365_0392 [Listeria monocytogenes str. 4b F2365]                                                            | 1E-24                     | 1E-10                   | 21.744              | 12                   | 9.99              | 5                  | 0.01347         | 3.5           |
| 46906624                                                                                  | hypothetical protein LMO02365_0405 [Listeria monocytogenes str. 4b F2365]                                                            | 1E-20                     | 0.000001                | 16.946              | 10                   | 4.191             | 3                  | 0.000385        | 6             |
| 46906639                                                                                  | glycosyl hydrolase, family 38 [Listeria monocytogenes str. 4b F2365]                                                                 | 0.000001                  |                         | 4.884               | 3                    | 0                 | 0                  | 8.44E-06        | 2.1           |
| 46906644                                                                                  | glyoxalase family protein [Listeria monocytogenes str. 4b F2365]                                                                     | 0.00000001                |                         | 9.871               | 4                    | 0                 | 0                  | 3.87E-06        | 5.2           |
| 46906665                                                                                  | acetyltransferase, CysII-LacA/LacNadI family [Listeria monocytogenes str. 4b F2365]                                                  | 0.000001                  |                         | 6.252               | 3                    | 0                 | 0                  | 1.06E-05        | 2.1           |
| 46906737                                                                                  | 3-dehydroquinate dehydratase [Listeria monocytogenes str. 4b F2365]                                                                  | 1E-12                     |                         | 9.205               | 6                    | 0                 | 0                  | 0.00936         | 2.2           |
| 46906765                                                                                  | hypothetical protein LMO02365_0549 [Listeria monocytogenes str. 4b F2365]                                                            | 1E-14                     | 0.0001                  | 14.224              | 7                    | 2.988             | 2                  | 0.006918        | 3.5           |
| 46906783                                                                                  | carboxypeptidase, putative [Listeria monocytogenes str. 4b F2365]                                                                    | 1E-28                     |                         | 33.384              | 14                   | 0                 | 0                  | 2.20E-16        | 2.2           |
| 46906784                                                                                  | tagutase 1 6-dephosphate aldolase [Listeria monocytogenes str. 4b F2365]                                                             | 1E-10                     |                         | 14.238              | 5                    | 0                 | 0                  | 0.000465        | 2.1           |
| 46906813                                                                                  | ATP phosphoribosyltransferase [Listeria monocytogenes str. 4b F2365]                                                                 | 0.000001                  | 0.01                    | 6.037               | 3                    | 1.711             | 1                  | 0.0177          | 2.2           |
| 46906828                                                                                  | translocase [Listeria monocytogenes str. 4b F2365]                                                                                   | 1E-14                     |                         | 12.476              | 7                    | 0                 | 0                  | 4.42E-12        | 1.6           |
| 46906839                                                                                  | homoserine O-acetyltransferase [Listeria monocytogenes str. 4b F2365]                                                                | 1E-14                     | 0.000001                | 17.302              | 7                    | 4.773             | 3                  | 0.02516         | 7             |
| 46906901                                                                                  | serine/threonine protein phosphatase family protein [Listeria monocytogenes str. 4b F2365]                                           | 1E-10                     |                         | 9.707               | 5                    | 0                 | 0                  | 1.62E-11        | 3.8           |
| 46906925                                                                                  | hypothetical protein LMO02365_0710 [Listeria monocytogenes str. 4b F2365]                                                            | 1E-28                     | 0.00000001              | 25.398              | 14                   | 7.89              | 4                  | 0.01147         | 7             |
| 46906930                                                                                  | flagellar biosynthesis protein [Listeria monocytogenes str. 4b F2365]                                                                | 1E-10                     | 0.01                    | 10.167              | 5                    | 1.844             | 1                  | 0.01606         | 1.5           |
| 46906960                                                                                  | hypothetical protein LMO02365_0745 [Listeria monocytogenes str. 4b F2365]                                                            | 0.000001                  |                         | 5.557               | 3                    | 0                 | 0                  | 0.000732        | 4.2           |
| 46906993                                                                                  | hypothetical protein LMO02365_0778 [Listeria monocytogenes str. 4b F2365]                                                            | 1E-28                     | 0.0001                  | 26.458              | 14                   | 3.545             | 6                  | 3.94E-06        | 4.6           |
| 46907061                                                                                  | phosphatase, putative [Listeria monocytogenes str. 4b F2365]                                                                         | 1E-30                     | 1E-10                   | 31.825              | 15                   | 9.969             | 5                  | 0.04505         | 2.1           |
| 46907123                                                                                  | anti-sigma B factor RobT [Listeria monocytogenes str. 4b F2365]                                                                      | 0.00000001                | 0.01                    | 10.853              | 4                    | 1.745             | 1                  | 0.009362        | 4.1           |
| 46907148                                                                                  | succinate-semialdehyde dehydrogenase [Listeria monocytogenes str. 4b F2365]                                                          | 1E-50                     | 0.000001                | 82.178              | 25                   | 5.062             | 3                  | 2.54E-11        | 2.1           |
| 46907158                                                                                  | ABC transporter, ATP-binding protein [Listeria monocytogenes str. 4b F2365]                                                          | 1E-10                     |                         | 6.403               | 3                    | 0                 | 0                  | 6.26E-06        | 5.2           |
| 46907187                                                                                  | hypothetical protein LMO02365_0975 [Listeria monocytogenes str. 4b F2365]                                                            | 1E-80                     | 1E-54                   | 166.781             | 40                   | 110.279           | 27                 | 0.002129        | 5.2           |
| 46907274                                                                                  | molybdopterin biosynthesis protein MoeA [Listeria monocytogenes str. 4b F2365]                                                       | 1E-16                     | 0.01                    | 16.409              | 8                    | 1.781             | 1                  | 7.93E-05        | 2.3           |
| 46907275                                                                                  | molybdopterin-guanine dinucleotide biosynthesis protein B [Listeria monocytogenes str. 4b F2365]                                     | 1E-14                     |                         | 14.883              | 7                    | 0                 | 0                  | 4.59E-14        | 2.5           |
| 46907331                                                                                  | transcriptional regulator, AraC family [Listeria monocytogenes str. 4b F2365]                                                        | 0.000001                  |                         | 5.838               | 3                    | 0                 | 0                  | 4.27E-05        | 3.5           |
| 46907350                                                                                  | transcriptional regulator, MarR family [Listeria monocytogenes str. 4b F2365]                                                        | 1E-18                     |                         | 18.417              | 9                    | 0                 | 0                  | 8.80E-15        | 5.2           |
| 46907378                                                                                  | propanediol utilization protein PduI [Listeria monocytogenes str. 4b F2365]                                                          | 1E-12                     | 0.000001                | 11.379              | 6                    | 5.331             | 3                  | 0.03984         | 2.1           |
| 46907384                                                                                  | propanol dehydrogenase [Listeria monocytogenes str. 4b F2365]                                                                        | 1E-24                     |                         | 22.439              | 12                   | 0                 | 0                  | 1.28E-06        | 2.1           |
| 46907387                                                                                  | L-threonine-O-3-phosphate decarboxylase [Listeria monocytogenes str. 4b F2365]                                                       | 1E-64                     | 1E-22                   | 52.158              | 32                   | 18.94             | 11                 | 1.63E-07        | 2.5           |
| 46907417                                                                                  | cobalamin biosynthesis protein CbiJ [Listeria monocytogenes str. 4b F2365]                                                           | 1E-14                     |                         | 9.257               | 5                    | 0                 | 0                  | 1.68E-07        | 5.2           |
| 46907521                                                                                  | hly protein [Listeria monocytogenes str. 4b F2365]                                                                                   | 1E-20                     | 0.00000001              | 36.543              | 10                   | 6.983             | 3                  | 0.000884        | 4.3           |
| 46907540                                                                                  | ribosome recycling factor [Listeria monocytogenes str. 4b F2365]                                                                     | 1E-68                     | 1E-56                   | 90.466              | 34                   | 64.947            | 28                 | 0.01201         | 4.1           |
| 46907550                                                                                  | ribosomal protein L7A family [Listeria monocytogenes str. 4b F2365]                                                                  | 1E-12                     | 0.01                    | 11.759              | 6                    | 1.582             | 1                  | 0.002109        | 3.7           |
| 46907564                                                                                  | hypothetical protein LMO02365_1355 [Listeria monocytogenes str. 4b F2365]                                                            | 0.000001                  |                         | 5.632               | 3                    | 0                 | 0                  | 1.27E-06        | 5.2           |
| 46907565                                                                                  | glucokinase [Listeria monocytogenes str. 4b F2365]                                                                                   | 1E-16                     | 0.000001                | 16.371              | 8                    | 5.965             | 3                  | 0.02131         | 2.1           |
| 46907576                                                                                  | glycine dehydrogenase subunit 2 [Listeria monocytogenes str. 4b F2365]                                                               | 1E-18                     | 0.01                    | 35.22               | 9                    | 1.665             | 1                  | 5.51E-07        | 7             |
| 46907583                                                                                  | acetyl-CoA carboxylase [Listeria monocytogenes str. 4b F2365]                                                                        | 1E-18                     | 1E-12                   | 17.13               | 9                    | 10.535            | 6                  | 0.03783         | 2.4           |
| 46907627                                                                                  | HDCI domain protein [Listeria monocytogenes str. 4b F2365]                                                                           | 1E-10                     | 1E-10                   | 9.257               | 5                    | 0                 | 0                  | 0.03928         | 5.2           |
| 46907650                                                                                  | glycine betaine/L-proline ABC transporter, permease/glycine betaine/L-proline-binding protein [Listeria monocytogenes str. 4b F2365] | 1E-18                     | 0.0001                  | 16.826              | 9                    | 3.101             | 2                  | 0.001365        | 1.2           |
| 46907654                                                                                  | glycine betaine/L-proline ABC transporter, glycinic betaine/L-proline-binding protein [Listeria monocytogenes str. 4b F2365]         | 1E-10                     | 0.01                    | 22.838              | 5                    | 1.578             | 1                  | 0.008442        | 1.2           |
| 46907668                                                                                  | DNA-binding protein, ATP-binding protein [Listeria monocytogenes str. 4b F2365]                                                      | 1E-12                     | 0.0001                  | 10.36               | 6                    | 3.016             | 2                  | 0.03591         | 5.2           |
| 46907679                                                                                  | 4-hydroxy-3-methyl-2-oxyl diphosphate reductase [Listeria monocytogenes str. 4b F2365]                                               | 0.000001                  |                         | 5.547               | 3                    | 0                 | 0                  | 0.000418        | 2.3           |
| 46907703                                                                                  | heat-inducible transcription repressor [Listeria monocytogenes str. 4b F2365]                                                        | 0.00000001                |                         | 7.377               | 4                    | 0                 | 0                  | 5.91E-08        | 3.5           |
| 46907704                                                                                  | coproporphyrinogen III oxidase [Listeria monocytogenes str. 4b F2365]                                                                | 1E-14                     | 0.01                    | 13.121              | 7                    | 2.18              | 1                  | 0.004876        | 2.5           |
| 46907709                                                                                  | hypothetical protein LMO02365_1500 [Listeria monocytogenes str. 4b F2365]                                                            | 0.000001                  | 0.01                    | 5.023               | 3                    | 1.192             | 1                  | 0.01044         | 5.2           |
| 46907713                                                                                  | hypothetical protein LMO02365_1504 [Listeria monocytogenes str. 4b F2365]                                                            | 0.000001                  | 0.0001                  | 12.789              | 3                    | 3.529             | 1                  | 0.002306        | 5.2           |
| 46907766                                                                                  | glycerol kinase [Listeria monocytogenes str. 4b F2365]                                                                               | 1E-12                     | 0.000001                | 17.872              | 6                    | 8.84              | 3                  | 0.0322          | 3.5           |
| 46907792                                                                                  | DNA replication protein DnaB [Listeria monocytogenes str. 4b F2365]                                                                  | 0.000001                  |                         | 5.919               | 3                    | 0                 | 0                  | 0.00019         | 3.1           |
| 46907811                                                                                  | universal stress protein family [Listeria monocytogenes str. 4b F2365]                                                               | 1E-74                     | 0.0001                  | 146.594             | 37                   | 6.068             | 2                  | 2.20E-16        | 4.7           |
| 46907814                                                                                  | thiol peroxidase [Listeria monocytogenes str. 4b F2365]                                                                              | 1E-30                     | 1E-38                   | 97.47               | 19                   | 66.97             | 13                 | 0.002786        | 4.1           |
| 46907831                                                                                  | hypothetical protein LMO02365_1622 [Listeria monocytogenes str. 4b F2365]                                                            | 1E-38                     |                         | 27.819              | 69                   | 64.002            | 8                  | 2.00E-16        | 4.1           |
| 46907832                                                                                  | hypothetical protein LMO02365_1623 [Listeria monocytogenes str. 4b F2365]                                                            | 1E-14                     | 0.01                    | 29.83               | 7                    | 1.477             | 1                  | 2.02E-05        | 5.2           |
| 46907845                                                                                  | metallobeta-lactamase family protein [Listeria monocytogenes str. 4b F2365]                                                          | 1E-10                     |                         | 9.879               | 5                    | 0                 | 0                  | 1.19E-12        | 5.2           |
| 46907851                                                                                  | MutM/mutX family protein [Listeria monocytogenes str. 4b F2365]                                                                      | 1E-16                     | 0.01                    | 14.109              | 8                    | 1.481             | 1                  | 0.00048         | 3.2           |
| 46907859                                                                                  | N-(gamma-phosphoribosyl)histidinamide isomerase [Listeria monocytogenes str. 4b F2365]                                               | 1E-20                     | 0.01                    | 24.661              | 10                   | 1.579             | 1                  | 1.64E-07        | 2.2           |
| 46907907                                                                                  | manganum-specific isochorismate synthase [Listeria monocytogenes str. 4b F2365]                                                      | 1E-38                     | 1E-30                   | 32.737              | 19                   | 25.665            | 15                 | 0.01331         | 2.5           |
| 46907926                                                                                  | hypothetical protein LMO02365_1719 [Listeria monocytogenes str. 4b F2365]                                                            | 1E-14                     | 0.000001                | 12.949              | 7                    | 6.397             | 3                  | 0.006592        | 5.2           |
| 46907950                                                                                  | PTS system, beta-glucoside-specific, IIA component [Listeria monocytogenes str. 4b F2365]                                            | 1E-26                     | 0.00000001              | 54.225              | 13                   | 14.271            | 4                  | 0.000524        | 1.2           |
| 46907997                                                                                  | phosphoribosylaminimidazole synthetase [Listeria monocytogenes str. 4b F2365]                                                        | 0.000001                  |                         | 6.471               | 3                    | 0                 | 0                  | 1.44E-06        | 6             |
| 46908023                                                                                  | hypothetical protein LMO02365_1818 [Listeria monocytogenes str. 4b F2365]                                                            | 0.00000001                |                         | 16.944              | 4                    | 0                 | 0                  | 3.49E-06        | 2.1           |
| 46908109                                                                                  | formate-tetrahydrofolate ligase [Listeria monocytogenes str. 4b F2365]                                                               | 1E-32                     |                         | 63.304              | 16                   | 0                 | 0                  | 1.03E-12        | 2.5           |
| 46908167                                                                                  | DNA-binding protein HU [Listeria monocytogenes str. 4b F2365]                                                                        | 1E-126                    | 1E-68                   | 234.861             | 63                   | 121.191           | 34                 | 2.18E-08        | 3.4           |
| 46908213                                                                                  | 3-isopropylmalate dehydrogenase [Listeria monocytogenes str. 4b F2365]                                                               | 1E-16                     | 1E-68                   | 16.883              | 8                    | 0                 | 0                  | 1.83E-12        | 5.2           |
| 46908221                                                                                  | transcriptional regulator, LacI family [Listeria monocytogenes str. 4b F2365]                                                        | 0.000001                  |                         | 7.537               | 3                    | 0                 | 0                  | 3.39E-05        | 3.5           |
| 46908251                                                                                  | carbon-sulfur lyase [Listeria monocytogenes str. 4b F2365]                                                                           | 0.00000001                |                         | 6.764               | 4                    | 0                 | 0                  | 4.79E-09        | 2.5           |
| 46908270                                                                                  | cell division protein FtsQ [Listeria monocytogenes str. 4b F2365]                                                                    | 0.000001                  |                         | 5.68                | 3                    | 0                 | 0                  | 2.18E-05        | 1.7           |
| 46908309                                                                                  | ABC transporter, ATP-binding protein [Listeria monocytogenes str. 4b F2365]                                                          | 1E-28                     | 1E-18                   | 23.248              | 14                   | 11.971            | 8                  | 0.004778        | 4.1           |
| 46908333                                                                                  | PTS system galactitol-specific enzyme IIA component [Listeria monocytogenes str. 4b F2365]                                           | 1E-20                     | 0.000001                | 23.271              | 10                   | 6.333             | 3                  | 0.001163        | 1.2           |
| 46908353                                                                                  | acetyltransferase, GNAT family [Listeria monocytogenes str. 4b F2365]                                                                | 0.00000001                |                         | 7.168               | 4                    | 0                 | 0                  | 6.98E-06        | 5.2           |
| 46908434                                                                                  | transcriptional regulator, MarR family [Listeria monocytogenes str. 4b F2365]                                                        | 1E-10                     |                         | 9.828               | 5                    | 0                 | 0                  | 4.16E-08        | 3.5           |
| 46908439                                                                                  | phosphoglycerate mutase [Listeria monocytogenes str. 4b F2365]                                                                       | 1E-36                     | 1E-14                   | 13.806              | 18                   | 18.424            | 10                 | 5.95E-05        | 1.8           |
| 46908484                                                                                  | amino acid ABC transporter, ATP-binding protein [Listeria monocytogenes str. 4b F2365]                                               | 0.00000001                | 0.01                    | 6.832               | 4                    | 1.455             | 1                  | 0.05045         | 1.2           |
| 46908524                                                                                  | hypothetical protein LMO02365_2324 [Listeria monocytogenes str. 4b F2365]                                                            | 1E-10                     | 0.01                    | 8.671               | 5                    | 1.915             | 1                  | 0.02309         | 5.2           |
| 46908565                                                                                  | hypothetical protein LMO02365_2365 [Listeria monocytogenes str. 4b F2365]                                                            | 1E-48                     | 1E-12                   | 74.933              | 24                   | 9.966             | 6                  | 5.04E-09        | 5.2           |
| 46908597                                                                                  | AraC family protein [Listeria monocytogenes str. 4b F2365]                                                                           | 0.000001                  |                         | 8.8                 | 3                    | 1.571             | 1                  | 0.01161         | 5.2           |
| 46908764                                                                                  | morphine 3-O-dehydrogenase [Listeria monocytogenes str. 4b F2365]                                                                    | 1E-10                     |                         | 10.621              | 5                    | 0                 | 0                  | 4.40E-08        | 2.1           |
| 46908875                                                                                  | hypothetical protein LMO02365_2676 [Listeria monocytogenes str. 4b F2365]                                                            | 1E-14                     | 0.00000001              | 24.341              | 7                    | 6.195             | 4                  | 0.01049         | 5.2           |
| 46908918                                                                                  | phosphogluco-binding protein [Listeria monocytogenes str. 4b F2365]                                                                  | 1E-18                     | 0.01                    | 23.476              | 9                    | 1.262             | 1                  | 0.005213        | 5.2           |
| 46908926                                                                                  | hypothetical protein LMO02365_2727 [Listeria monocytogenes str. 4b F2365]                                                            | 1E-18                     | 0.0001                  | 16.93               | 9                    | 3.216             | 2                  | 0.000997        | 5.2           |
| 46908975                                                                                  | catalase [Listeria monocytogenes str. 4b F2365]                                                                                      | 1E-208                    | 1E-150                  | 399.012             | 104                  | 286.546           | 75                 | 0.0032          | 2.4           |
| 46909014                                                                                  | phosphoserine aminotransferase [Listeria monocytogenes str. 4b F2365]                                                                | 0.000001                  |                         | 5.318               | 3                    | 0                 | 0                  | 9.74E-09        | 2.2           |
| 46909034                                                                                  | hypothetical protein LMO02365_2836 [Listeria monocytogenes str. 4b F2365]                                                            | 0.000001                  |                         | 5.865               | 3                    | 0                 | 0                  | 1.40E-07        | 5.2           |
| <b>Proteins with orthology that were significantly increased in EGD relative to F2365</b> |                                                                                                                                      |                           |                         |                     |                      |                   |                    |                 |               |
| 16802076                                                                                  | hypothetical protein lmo0028 [Listeria monocytogenes EGD-e]                                                                          |                           | 1E-14                   | 0                   | 0                    | 13.107            | 7                  | 4.78E-09        | 4.5           |
| 16802112                                                                                  | hypothetical protein lmo0064 [Listeria monocytogenes EGD-e]                                                                          |                           | 0.000001                | 0                   | 0                    | 5.724             | 3                  | 0.000255        | 6             |
| 16802126                                                                                  | hypothetical protein lmo0078 [Listeria monocytogenes EGD-e]                                                                          |                           | 0.00000001              | 0                   | 0                    | 6.826             | 4                  | 5.15E-05        | 2.1           |
| 16802155                                                                                  | hypothetical protein lmo0107 [Listeria monocytogenes EGD-e]                                                                          |                           | 0.000001                | 0                   | 0                    | 5.779             | 3                  | 1.63E-05        | 1.2           |
| 16802179                                                                                  | hypothetical protein lmo0131 [Listeria monocytogenes EGD-e]                                                                          |                           | 0.000001                | 0                   | 0                    | 4.334             | 3                  | 5.83E-07        | 2.2           |
| 16802223                                                                                  | methionyl-tRNA synthetase [Listeria monocytogenes EGD-e]                                                                             |                           | 0.00000001              | 0                   | 0                    | 8.829             | 4                  | 0.01378         | 2.2           |
| 16802229                                                                                  | hypothetical protein lmo0183 [Listeria monocytogenes EGD-e]                                                                          |                           | 0.000001                | 0                   | 0                    | 5.14              | 3                  | 0.03445         | 2.1           |
| 16802244                                                                                  | hypothetical protein lmo0198 [Listeria monocytogenes EGD-e]                                                                          |                           | 0.00000001              | 0                   | 0                    | 6.6               | 4                  | 0.006693        | 7             |
| 16802252                                                                                  | hypothetical protein lmo0206 [Listeria monocytogenes EGD-e]                                                                          |                           | 1E-10                   | 0                   | 0                    | 12.563            | 6                  | 1.53E-08        |               |

|          |                                                                                                            |           |           |         |        |         |          |          |     |
|----------|------------------------------------------------------------------------------------------------------------|-----------|-----------|---------|--------|---------|----------|----------|-----|
| 16803278 | ribonuclease PH [Listeria monocytogenes EGD-e]                                                             | 0.0000001 | 0         | 0       | 7.352  | 4       | 0.005561 | 3.6      |     |
| 16803280 | hypothetical protein lmo1240 [Listeria monocytogenes EGD-e]                                                | 1E-10     | 0         | 0       | 15.966 | 5       | 0.000296 | 5.2      |     |
| 16803299 | gamma-glutamyl phosphate reductase [Listeria monocytogenes EGD-e]                                          | 1E-10     | 0         | 0       | 11.796 | 7       | 5.84E-13 | 2.2      |     |
| 16803313 | hypothetical protein lmo1273 [Listeria monocytogenes EGD-e]                                                | 0.0000001 | 0         | 0       | 9.387  | 4       | 0.001248 | 3.1      |     |
| 16803333 | hypothetical protein lmo1293 [Listeria monocytogenes EGD-e]                                                | 1E-12     | 0         | 0       | 13.982 | 6       | 1.31E-08 | 2.1      |     |
| 16803336 | hypothetical protein lmo1316 [Listeria monocytogenes EGD-e]                                                | 0.000001  | 0         | 0       | 4.608  | 3       | 1.87E-06 | 2.4      |     |
| 16803370 | ribosomal protein S15 [Listeria monocytogenes EGD-e]                                                       | 0.0000001 | 0         | 0       | 20.932 | 4       | 3.01E-06 | 3.7      |     |
| 16803381 | hypothetical protein lmo1341 [Listeria monocytogenes EGD-e]                                                | 0.0000001 | 0         | 0       | 6.892  | 3       | 6.03E-05 | 1.1      |     |
| 16803413 | hypothetical protein lmo1373 [Listeria monocytogenes EGD-e]                                                | 0.0000001 | 0         | 0       | 6.162  | 4       | 0.01413  | 2.4      |     |
| 16803414 | hypothetical protein lmo1374 [Listeria monocytogenes EGD-e]                                                | 0.000001  | 0         | 0       | 6.32   | 3       | 6.25E-07 | 2.4      |     |
| 16803434 | hypothetical protein lmo1394 [Listeria monocytogenes EGD-e]                                                | 0.000001  | 0         | 0       | 5.332  | 3       | 2.13E-06 | 2.4      |     |
| 16803491 | hypothetical protein lmo1453 [Listeria monocytogenes EGD-e]                                                | 0.000001  | 0         | 0       | 5.197  | 3       | 0.000223 | 5.2      |     |
| 16803503 | hypothetical protein lmo1463 [Listeria monocytogenes EGD-e]                                                | 0.000001  | 0         | 0       | 8.436  | 3       | 0.002281 | 2.3      |     |
| 16803548 | hypothetical protein lmo1508 [Listeria monocytogenes EGD-e]                                                | 0.000001  | 0         | 0       | 6.373  | 3       | 7.35E-06 | 1.3      |     |
| 16803552 | hypothetical protein lmo1512 [Listeria monocytogenes EGD-e]                                                | 0.000001  | 0         | 0       | 5.578  | 3       | 2.65E-05 | 3.6      |     |
| 16803599 | thymidyl-dRNA synthetase [Listeria monocytogenes EGD-e]                                                    | 1E-14     | 0         | 0       | 15.45  | 7       | 1.19E-05 | 3.7      |     |
| 16803611 | 6-phosphofructokinase [Listeria monocytogenes EGD-e]                                                       | 0.000001  | 0         | 0       | 9.265  | 3       | 0.009466 | 2.1      |     |
| 16803621 | acetate:propionate kinase [Listeria monocytogenes EGD-e]                                                   | 0.0000001 | 0         | 0       | 7.429  | 4       | 3.17E-09 | 2.1      |     |
| 16803631 | hypothetical protein lmo1591 [Listeria monocytogenes EGD-e]                                                | 1E-14     | 0         | 0       | 14.159 | 7       | 0.002949 | 2.2      |     |
| 16803635 | hypothetical protein lmo1595 [Listeria monocytogenes EGD-e]                                                | 0.000001  | 0         | 0       | 15.602 | 3       | 0.000679 | 5.1      |     |
| 16803691 | hypothetical protein lmo1651 [Listeria monocytogenes EGD-e]                                                | 1E-10     | 0         | 0       | 10.691 | 5       | 1.71E-08 | 1.2      |     |
| 16803702 | hypothetical protein lmo1662 [Listeria monocytogenes EGD-e]                                                | 1E-12     | 0         | 0       | 10.513 | 6       | 0.001146 | 5.2      |     |
| 16803710 | hypothetical protein lmo1670 [Listeria monocytogenes EGD-e]                                                | 0.000001  | 0         | 0       | 5.999  | 3       | 8.47E-05 | 5.2      |     |
| 16803715 | 2-oxoglutarate decarboxylase [Listeria monocytogenes EGD-e]                                                | 1E-32     | 0         | 0       | 25.884 | 16      | 1.07E-10 | 2.5      |     |
| 16803721 | 5-methyltetrahydropteroyltrimethylglycinate--homocysteine methyltransferase [Listeria monocytogenes EGD-e] | 1E-10     | 0         | 0       | 9.938  | 5       | 0.000405 | 2.2      |     |
| 16803729 | hypothetical protein lmo1689 [Listeria monocytogenes EGD-e]                                                | 1E-18     | 0         | 0       | 16.227 | 9       | 2.20E-16 | 3.2      |     |
| 16803743 | hypothetical protein lmo1703 [Listeria monocytogenes EGD-e]                                                | 0.0000001 | 0         | 0       | 7.016  | 4       | 2.88E-06 | 3.6      |     |
| 16803753 | hypothetical protein lmo1753 [Listeria monocytogenes EGD-e]                                                | 0.000001  | 0         | 0       | 4.861  | 4       | 0.000154 | 1.4      |     |
| 16803797 | hypothetical protein lmo1757 [Listeria monocytogenes EGD-e]                                                | 0.000001  | 0         | 0       | 5.838  | 3       | 0.04697  | 5.2      |     |
| 16803798 | DNA ligase [Listeria monocytogenes EGD-e]                                                                  | 0.000001  | 0         | 0       | 5.223  | 3       | 0.000149 | 3.1      |     |
| 16803858 | ribulose-phosphate 3-epimerase [Listeria monocytogenes EGD-e]                                              | 0.0000001 | 0         | 0       | 6.959  | 4       | 4.20E-07 | 2.1      |     |
| 16803900 | methionine sulfoniode reductase A [Listeria monocytogenes EGD-e]                                           | 1E-10     | 0         | 0       | 12.701 | 7       | 0.01442  | 5.1      |     |
| 16803923 | hypothetical protein lmo1884 [Listeria monocytogenes EGD-e]                                                | 0.000001  | 0         | 0       | 6.431  | 3       | 9.80E-08 | 1.2      |     |
| 16803937 | hypothetical protein lmo1898 [Listeria monocytogenes EGD-e]                                                | 0.000001  | 0         | 0       | 4.193  | 3       | 3.35E-05 | 5.2      |     |
| 16803953 | hypothetical protein lmo1914 [Listeria monocytogenes EGD-e]                                                | 0.0000001 | 0         | 0       | 5.786  | 4       | 6.35E-09 | 5.2      |     |
| 16803974 | hypothetical protein lmo1935 [Listeria monocytogenes EGD-e]                                                | 1E-12     | 0         | 0       | 10.789 | 6       | 0.000518 | 3.8      |     |
| 16803975 | hypothetical protein lmo1939 [Listeria monocytogenes EGD-e]                                                | 0.000001  | 0         | 0       | 7.255  | 4       | 2.25E-08 | 2.2      |     |
| 16804021 | hypothetical protein lmo1982 [Listeria monocytogenes EGD-e]                                                | 0.000001  | 0         | 0       | 6.468  | 3       | 0.04721  | 5.2      |     |
| 16804057 | diaminopimelate epimerase [Listeria monocytogenes EGD-e]                                                   | 0.0000001 | 0         | 0       | 6.901  | 4       | 5.77E-06 | 2.2      |     |
| 16804059 | hypothetical protein lmo2020 [Listeria monocytogenes EGD-e]                                                | 1E-10     | 0         | 0       | 8.141  | 5       | 1.52E-10 | 1.7      |     |
| 16804085 | 2-dehydropanotate 2-reductase [Listeria monocytogenes EGD-e]                                               | 0.000001  | 0         | 0       | 6.312  | 3       | 5.11E-07 | 2.2      |     |
| 16804090 | hypothetical protein lmo2051 [Listeria monocytogenes EGD-e]                                                | 1E-12     | 0         | 0       | 9.224  | 6       | 6.77E-10 | 5.2      |     |
| 16804095 | hypothetical protein lmo2056 [Listeria monocytogenes EGD-e]                                                | 1E-10     | 0         | 0       | 7.75   | 5       | 0.002226 | 5.2      |     |
| 16804118 | hypothetical protein lmo2079 [Listeria monocytogenes EGD-e]                                                | 0.0000001 | 0         | 0       | 7.039  | 4       | 4.39E-07 | 5.1      |     |
| 16804170 | hypothetical protein lmo2131 [Listeria monocytogenes EGD-e]                                                | 0.0000001 | 0         | 0       | 7.344  | 7       | 0.01031  | 5.1      |     |
| 16804171 | hypothetical protein lmo2132 [Listeria monocytogenes EGD-e]                                                | 1E-16     | 0         | 0       | 12.404 | 8       | 0.000515 | 5.1      |     |
| 16804181 | hypothetical protein lmo2142 [Listeria monocytogenes EGD-e]                                                | 0.000001  | 0         | 0       | 4.393  | 3       | 5.19E-06 | 6        |     |
| 16804207 | hypothetical protein lmo2168 [Listeria monocytogenes EGD-e]                                                | 0.000001  | 0         | 0       | 10.051 | 3       | 1.04E-07 | 4.2      |     |
| 16804219 | putative peptidoglycan bound protein (LPGTG motif) [Listeria monocytogenes EGD-e]                          | 0.0000001 | 0         | 0       | 8.158  | 4       | 5.65E-07 | 1.8      |     |
| 16804266 | hypothetical protein lmo2227 [Listeria monocytogenes EGD-e]                                                | 1E-18     | 0         | 0       | 15.926 | 9       | 2.20E-16 | 3.2      |     |
| 16804308 | hypothetical protein lmo2269 [Listeria monocytogenes EGD-e]                                                | 0.000001  | 0         | 0       | 4.356  | 3       | 2.30E-08 | 6        |     |
| 16804397 | hypothetical protein lmo2359 [Listeria monocytogenes EGD-e]                                                | 0.000001  | 0         | 0       | 5.478  | 3       | 0.000222 | 5.2      |     |
| 16804428 | hypothetical protein lmo2390 [Listeria monocytogenes EGD-e]                                                | 1E-12     | 0         | 0       | 9.731  | 6       | 0.001154 | 1.4      |     |
| 16804452 | hypothetical protein lmo2414 [Listeria monocytogenes EGD-e]                                                | 1E-14     | 0         | 0       | 14.681 | 7       | 5.38E-05 | 2.2      |     |
| 16804472 | hypothetical protein lmo2434 [Listeria monocytogenes EGD-e]                                                | 1E-16     | 0         | 0       | 12.452 | 8       | 3.08E-06 | 2.2      |     |
| 16804474 | hypothetical protein lmo2436 [Listeria monocytogenes EGD-e]                                                | 1E-12     | 0         | 0       | 12.985 | 6       | 5.74E-05 | 3.5      |     |
| 16804482 | hypothetical protein lmo2444 [Listeria monocytogenes EGD-e]                                                | 1E-10     | 0         | 0       | 11.399 | 6       | 0.001136 | 2.1      |     |
| 16804484 | hypothetical protein lmo2446 [Listeria monocytogenes EGD-e]                                                | 0.0000001 | 0         | 0       | 7.815  | 4       | 1.14E-07 | 2.1      |     |
| 16804488 | hypothetical protein lmo2450 [Listeria monocytogenes EGD-e]                                                | 0.0000001 | 0         | 0       | 6.867  | 4       | 0.00378  | 2.4      |     |
| 16804492 | hypothetical protein lmo2454 [Listeria monocytogenes EGD-e]                                                | 0.000001  | 0         | 0       | 4.632  | 3       | 2.98E-05 | 6        |     |
| 16804512 | hypothetical protein lmo2474 [Listeria monocytogenes EGD-e]                                                | 0.000001  | 0         | 0       | 4.433  | 3       | 4.26E-05 | 5.2      |     |
| 16804513 | hypothetical protein lmo2475 [Listeria monocytogenes str. 4b F2365]                                        | 1E-10     | 0         | 0       | 11.858 | 4       | 1.34E-07 | 2.1      |     |
| 16804526 | excinuclease ABC (subunit A) [Listeria monocytogenes EGD-e]                                                | 1E-10     | 0         | 0       | 9.773  | 5       | 0.000612 | 3.2      |     |
| 16804540 | hypothetical protein lmo2502 [Listeria monocytogenes EGD-e]                                                | 0.000001  | 0         | 0       | 4.658  | 3       | 0.000143 | 5.2      |     |
| 16804582 | thymidine kinase [Listeria monocytogenes str. 4b F2365]                                                    | 0.0000001 | 0         | 0       | 6.265  | 3       | 0.02142  | 2.3      |     |
| 16804619 | hypothetical protein lmo2580 [Listeria monocytogenes EGD-e]                                                | 0.0000001 | 0         | 0       | 6.121  | 3       | 1.27E-06 | 1.2      |     |
| 16804621 | hypothetical protein lmo2583 [Listeria monocytogenes EGD-e]                                                | 1E-12     | 0         | 0       | 10.914 | 6       | 4.36E-12 | 3.5      |     |
| 16804637 | hypothetical protein lmo2599 [Listeria monocytogenes EGD-e]                                                | 1E-22     | 0         | 0       | 19.475 | 11      | 1.06E-09 | 5.2      |     |
| 16804668 | ribosomal protein L23 [Listeria monocytogenes EGD-e]                                                       | 0.000001  | 0         | 0       | 5.129  | 3       | 0.03807  | 3.7      |     |
| 16804713 | hypothetical protein lmo2676 [Listeria monocytogenes EGD-e]                                                | 1E-20     | 0         | 0       | 22.112 | 10      | 2.69E-07 | 3.2      |     |
| 16804727 | hypothetical protein lmo2690 [Listeria monocytogenes EGD-e]                                                | 0.0000001 | 0         | 0       | 8.343  | 4       | 6.46E-08 | 3.5      |     |
| 16804750 | secreted protein with 1 GW repeat [Listeria monocytogenes EGD-e]                                           | 0.000001  | 0         | 0       | 5.358  | 3       | 0.03579  | 1.8      |     |
| 16804812 | hypothetical protein lmo2775 [Listeria monocytogenes EGD-e]                                                | 1E-18     | 0         | 0       | 16.766 | 9       | 2.20E-16 | 1.2      |     |
| 16804849 | hypothetical protein lmo2812 [Listeria monocytogenes EGD-e]                                                | 0.0000001 | 0         | 0       | 4.479  | 6       | 1.38E-06 | 1.1      |     |
| 4606231  | DNA gyrase, A subunit [Listeria monocytogenes str. 4b F2365]                                               | 0.0001    | 1E-14     | 3.099   | 2      | 13.026  | 7        | 0.01808  | 3.4 |
| 4606264  | glycerol hydrolase, family 9 [Listeria monocytogenes str. 4b F2365]                                        | 0.01      | 1E-10     | 2.742   | 1      | 10.426  | 5        | 0.01382  | 2.1 |
| 4606275  | ribosomal protein S6 [Listeria monocytogenes str. 4b F2365]                                                | 1E-16     | 1E-172    | 263.884 | 68     | 341.56  | 86       | 0.000311 | 3.7 |
| 4606283  | DHII subfamily 1 protein [Listeria monocytogenes str. 4b F2365]                                            | 1E-12     | 1E-10     | 9.731   | 6      | 11.810  | 6        | 0.02388  | 5.2 |
| 4606293  | hypothetical protein LMO2365_0071 [Listeria monocytogenes str. 4b F2365]                                   | 1E-12     | 1E-28     | 10.027  | 6      | 25.258  | 14       | 0.001453 | 5.2 |
| 4606294  | diarrheal toxin FtsK/SpolIIE family protein [Listeria monocytogenes str. 4b F2365]                         | 0.01      | 1E-14     | 1.859   | 1      | 14.636  | 7        | 0.03182  | 5.2 |
| 4606346  | ROK family protein LMO2365_0102 [Listeria monocytogenes str. 4b F2365]                                     | 0.01      | 1E-14     | 1.891   | 1      | 12.05   | 7        | 0.007825 | 5.1 |
| 4606370  | Sar/Thr protein phosphatase family protein [Listeria monocytogenes str. 4b F2365]                          | 0.01      | 1E-16     | 1.81    | 1      | 15.146  | 9        | 0.000161 | 1.2 |
| 4606370  | Sar/Thr protein phosphatase family protein [Listeria monocytogenes str. 4b F2365]                          | 0.01      | 1E-12     | 1.909   | 1      | 16.674  | 6        | 0.000698 | 1.8 |
| 4606372  | inostol-5-monophosphate dehydrogenase [Listeria monocytogenes str. 4b F2365]                               | 0.0001    | 1E-18     | 3.889   | 2      | 19.803  | 9        | 0.03795  | 2.3 |
| 4606375  | oligopeptide ABC transporter, oligopeptide-binding protein [Listeria monocytogenes str. 4b F2365]          | 1E-42     | 1E-48     | 78.754  | 21     | 291.218 | 74       | 2.20E-16 | 1.2 |
| 4606390  | zinc ABC transporter, ATP-binding protein [Listeria monocytogenes str. 4b F2365]                           | 0.01      | 1E-14     | 1.61    | 1      | 11.397  | 7        | 0.009162 | 5.2 |
| 4606396  | hypothetical protein LMO2365_0175 [Listeria monocytogenes str. 4b F2365]                                   | 0.00001   | 1E-16     | 3.44    | 2      | 9.805   | 6        | 0.000474 | 1.8 |
| 4606418  | hypothetical protein LMO2365_0197 [Listeria monocytogenes str. 4b F2365]                                   | 0.01      | 1E-12     | 1.63    | 1      | 9.805   | 6        | 0.000603 | 5.2 |
| 4606429  | stage V sporulation protein G [Listeria monocytogenes str. 4b F2365]                                       | 1E-20     | 1E-26     | 31.422  | 10     | 44.089  | 13       | 0.0431   | 1.7 |
| 4606435  | zinc metalloproteinase [Listeria monocytogenes str. 4b F2365]                                              | 1E-10     | 1E-30     | 8.361   | 5      | 26.523  | 15       | 0.000568 | 2.2 |
| 4606439  | lipoprotein, putative [Listeria monocytogenes str. 4b F2365]                                               | 0.00001   | 1E-16     | 3.544   | 2      | 2.406   | 7        | 6.60E-07 | 1.8 |
| 4606443  | general stress protein Ctc [Listeria monocytogenes str. 4b F2365]                                          | 1E-10     | 1E-40     | 16.98   | 5      | 75.151  | 20       | 1.86E-08 | 3.7 |
| 4606446  | transcription-rep coupling factor [Listeria monocytogenes str. 4b F2365]                                   | 0.0000001 | 1E-30     | 6.396   | 4      | 27.834  | 15       | 0.000746 | 3.2 |
| 4606477  | ribosomal protein L33 [Listeria monocytogenes str. 4b F2365]                                               | 0.0001    | 1E-12     | 2.968   | 2      | 8.787   | 6        | 0.03638  | 3.7 |
| 4606479  | transcription antitermination protein G [Listeria monocytogenes str. 4b F2365]                             | 1E-20     | 1E-36     | 22.112  | 10     | 29.127  | 18       | 0.02101  | 3.5 |
| 4606515  | hypothetical protein LMO2365_0294 [Listeria monocytogenes str. 4b F2365]                                   | 0.0001    | 1E-24     | 3.898   | 2      | 20.109  | 12       | 1.26E-05 | 5.1 |
| 4606520  | anaerobic ribonucleoside triphosphate reductase [Listeria monocytogenes str. 4b F2365]                     | 0.0000001 | 1E-20     | 6.084   | 4      | 17.268  | 10       | 0.00371  | 2.3 |
| 4606529  | sensory box histidine kinase [Listeria monocytogenes str. 4b F2365]                                        | 0.0001    | 1E-16     | 3.929   | 2      | 15.279  | 8        | 0.0247   | 1.3 |
| 4606533  | serine protease [Listeria monocytogenes str. 4b F2365]                                                     | 1E-24     | 1E-24     | 1.474   | 12     | 114.728 | 18       | 0.00019  | 4.1 |
| 4606555  | phosphomethylpyrimidine kinase [Listeria monocytogenes str. 4b F2365]                                      | 0.01      | 1E-12     | 1.41    | 1      | 10.693  | 6        | 0.04098  | 2.5 |
| 4606588  | dihydroxyacetone kinase [Listeria monocytogenes str. 4b F2365]                                             | 0.0001    | 1E-16     | 3.585   | 2      | 13.013  | 8        | 0.00635  | 2.1 |
| 4606596  | fumarate reductase [Listeria monocytogenes str. 4b F2365]                                                  | 0.0000001 | 1E-66     | 16.099  | 4      | 128.83  | 33       | 7.63E-14 | 1.4 |
| 4606605  | alkylphosphate utilization operon protein PnaA [Listeria monocytogenes str. 4b F2365]                      | 0.0001    | 1E-30     | 6.643   | 2      | 66.553  | 3        | 9.92E-08 | 5.2 |
| 4606616  | tdc, protein, putative [Listeria monocytogenes str. 4b F2365]                                              | 0.01      | 1E-22     | 5.453   | 3      | 20.124  | 11       | 2.76E-07 | 2.1 |
| 4606617  | thiamine-pyrophosphate-requiring enzyme [Listeria monocytogenes str. 4b F2365]                             | 0.000001  | 1E-20     | 4.852   | 3      | 17.097  | 10       | 0.001031 | 2.1 |
| 4606640  | PRD/PTS system IIA 2 domain protein [Listeria monocytogenes str. 4b F2365]                                 | 1E-26     | 1E-62     | 21.99   | 13     | 55.763  | 31       | 3.51E-08 | 3.5 |
| 4606652  | polysaccharide deacetylase family protein [Listeria monocytogenes str. 4b F2365]                           | 0.000001  | 1E-26     | 6.275   | 12     | 11.095  | 11       | 0.000972 | 2.1 |
| 4606726  | conserved hypothetical protein TKG00R048 [Listeria monocytogenes str. 4b F2365]                            | 0.000001  | 1E-14     | 2.987   | 2      | 10.768  | 7        | 0.00206  | 1.2 |
| 4606777  | hypothetical protein LMO2365_0561 [Listeria monocytogenes str. 4b F2365]                                   | 0.0000001 | 1E-58     | 6.578   | 4      | 60.909  | 29       | 2.65E-11 | 6   |
| 4606805  | glutamate dehydrogenase [Listeria monocytogenes str. 4b F2365]                                             | 0.0000001 | 1E-22     | 9.022   | 4      | 27.514  | 11       | 0.002124 | 2.2 |
| 4606857  | transcriptional regulator, MarR family [Listeria monocytogenes str. 4b F2365]                              | 0.000001  | 0.0000001 | 1.417   | 1      | 7.889   | 4        | 0.04055  | 3.5 |
| 4606872  | cell wall surface anchor family protein [Listeria monocytogenes str. 4b F2365]                             | 0.000001  | 1E-34     | 5.941   |        |         |          |          |     |

|          |                                                                                                       |           |             |         |     |          |     |           |       |
|----------|-------------------------------------------------------------------------------------------------------|-----------|-------------|---------|-----|----------|-----|-----------|-------|
| 46907616 | surface anisatrh [Listeria monocytogenes str. 4b F2365]                                               | 1E-72     | 4.9982E-163 | 143.281 | 36  | 287.127  | 73  | 9.19E-11  | 1.2   |
| 46907631 | DNA mismatch repair protein [Listeria monocytogenes str. 4b F2365]                                    | 1E-12     | 1E-30       | 9.635   | 6   | 31.85    | 15  | 0.000184  | 1.2   |
| 46907633 | pyruvate formate-lyase activating enzyme [Listeria monocytogenes str. 4b F2365]                       | 0.01      | 1E-10       | 1.584   | 1   | 6.886    | 8   | 0.03551   | 2.1   |
| 46907643 | hydroxymethylglutaryl-CoA synthase [Listeria monocytogenes str. 4b F2365]                             | 0.01      | 1E-16       | 1.51    | 1   | 25.935   | 8   | 3.88E-07  | 2.4   |
| 46907656 | glycine betaine-L-proline ABC transporter, ATP-binding protein [Listeria monocytogenes str. 4b F2365] | 0.01      | 1E-12       | 1.571   | 1   | 11.733   | 6   | 0.001029  | 1.2   |
| 46907666 | penicillin-binding protein [Listeria monocytogenes str. 4b F2365]                                     | 1E-10     | 1E-46       | 11.101  | 5   | 45.7     | 23  | 2.17E-09  | 1.1   |
| 46907677 | endonuclease IV [Listeria monocytogenes str. 4b F2365]                                                | 0.000001  | 1E-26       | 8.935   | 3   | 39.741   | 13  | 0.000286  | 2.7   |
| 46907684 | hypothetical protein LMOQ2365_1475 [Listeria monocytogenes str. 4b F2365]                             | 1E-14     | 1E-28       | 13.243  | 7   | 26.51    | 4   | 0.0151    | 5.2   |
| 46907701 | chaperone protein DnaK [Listeria monocytogenes str. 4b F2365]                                         | 1E-130    | 1E-298      | 244.058 | 65  | 554.379  | 149 | 2.20E-16  | 3.9   |
| 46907702 | co-chaperone GrpI [Listeria monocytogenes str. 4b F2365]                                              | 0.0000001 | 1E-18       | 15.842  | 4   | 34.379   | 9   | 0.03886   | 4.1   |
| 46907724 | transcription elongation factor GreA [Listeria monocytogenes str. 4b F2365]                           | 1E-24     | 1E-50       | 41.866  | 12  | 95.008   | 25  | 0.001022  | 3.5,3 |
| 46907734 | ABC transporter, permease protein [Listeria monocytogenes str. 4b F2365]                              | 0.0001    | 1E-24       | 4.467   | 2   | 19.627   | 12  | 2.20E-06  | 1.2   |
| 46907749 | N-acetylmuramoyl-L-alanine amidase, family 3 [Listeria monocytogenes str. 4b F2365]                   | 0.01      | 1E-14       | 1.56    | 1   | 12.344   | 7   | 0.001059  | 1.1   |
| 46907755 | protein-export membrane protein SecE [Listeria monocytogenes str. 4b F2365]                           | 0.000001  | 1E-28       | 5.475   | 3   | 26.216   | 14  | 0.002098  | 1.6   |
| 46907757 | proteasome translocase, YufC subunit [Listeria monocytogenes str. 4b F2365]                           | 1E-66     | 1E-126      | 149.705 | 33  | 291.441  | 63  | 2.87E-10  | 1.6   |
| 46907762 | L-lactate dehydrogenase [Listeria monocytogenes str. 4b F2365]                                        | 0.01      | 1E-16       | 1.901   | 1   | 14.472   | 8   | 0.000769  | 2.1   |
| 46907768 | 50S ribosomal protein L27 [Listeria monocytogenes str. 4b F2365]                                      | 0.01      | 1E-10       | 1.299   | 1   | 8.006    | 5   | 0.01382   | 3.7,1 |
| 46907776 | cell shape determining protein MreB [Listeria monocytogenes str. 4b F2365]                            | 0.0001    | 1E-12       | 3.427   | 2   | 11.906   | 6   | 0.02212   | 1.1   |
| 46907784 | delta-aminolevulinic acid dehydratase [Listeria monocytogenes str. 4b F2365]                          | 1E-12     | 1E-14       | 1.492   | 1   | 13.544   | 7   | 0.0001912 | 2.5   |
| 46907801 | pyruvate kinase [Listeria monocytogenes str. 4b F2365]                                                | 1E-24     | 1E-42       | 47.209  | 12  | 144.958  | 21  | 2.13E-07  | 2.2   |
| 46907810 | alanine dehydrogenase [Listeria monocytogenes str. 4b F2365]                                          | 1E-52     | 1E-92       | 97.107  | 26  | 171.258  | 39  | 5.15E-05  | 2.2   |
| 46907825 | sepiation ring formation regulator EtrA [Listeria monocytogenes str. 4b F2365]                        | 1E-38     | 1E-38       | 17.207  | 9   | 33.84    | 19  | 0.03766   | 1.7   |
| 46907846 | dRNA (guanine-N(7))-methyltransferase [Listeria monocytogenes str. 4b F2365]                          | 0.01      | 1E-10       | 1.867   | 1   | 9.603    | 5   | 0.004113  | 3.6   |
| 46907850 | dispiplase [Listeria monocytogenes str. 4b F2365]                                                     | 1E-12     | 1E-42       | 18.86   | 6   | 73.443   | 21  | 2.13E-07  | 2.2   |
| 46907873 | helicase, Sna2 family [Listeria monocytogenes str. 4b F2365]                                          | 1E-10     | 1E-34       | 7.739   | 5   | 29.933   | 17  | 7.62E-05  | 3.5,3 |
| 46907874 | exonuclease, SbcC family [Listeria monocytogenes str. 4b F2365]                                       | 1E-12     | 1E-46       | 12.103  | 6   | 44.91    | 23  | 4.93E-08  | 3.3   |
| 46907884 | hypothetical protein LMOQ2365_1676 [Listeria monocytogenes str. 4b F2365]                             | 0.0001    | 1E-10       | 1.391   | 2   | 9.201    | 5   | 0.0442    | 5.2   |
| 46907886 | elongation factor Tu [Listeria monocytogenes str. 4b F2365]                                           | 1E-124    | 1E-250      | 234.265 | 62  | 454.087  | 122 | 4.96E-13  | 3.5,3 |
| 46907891 | luceryl-rRNA synthetase [Listeria monocytogenes str. 4b F2365]                                        | 0.0001    | 1E-24       | 3.226   | 2   | 21.136   | 12  | 0.000189  | 3.7,2 |
| 46907899 | hypothetical protein LMOQ2365_1692 [Listeria monocytogenes str. 4b F2365]                             | 0.0001    | 1E-10       | 1.593   | 2   | 8.448    | 5   | 0.03119   | 5.2   |
| 46907903 | O-succinylbenzoic acid-CoA ligase [Listeria monocytogenes str. 4b F2365]                              | 0.01      | 1E-10       | 2.439   | 1   | 8.874    | 5   | 0.03967   | 2.5   |
| 46907972 | adenine deaminase [Listeria monocytogenes str. 4b F2365]                                              | 0.0001    | 1E-14       | 3.472   | 2   | 14.097   | 7   | 0.000769  | 2.1   |
| 46907981 | RNA methyltransferase, TrmA family [Listeria monocytogenes str. 4b F2365]                             | 0.01      | 0.0000001   | 1.863   | 1   | 8.151    | 4   | 0.005239  | 3.6   |
| 46907989 | ATP-dependent DNA helicase PcrA [Listeria monocytogenes str. 4b F2365]                                | 1E-16     | 1E-24       | 12.303  | 8   | 21.072   | 12  | 0.01504   | 3.1   |
| 46907994 | phosphoribosylamine-glycine ligase [Listeria monocytogenes str. 4b F2365]                             | 0.0001    | 1E-56       | 2.884   | 2   | 67.959   | 28  | 2.20E-16  | 2.3   |
| 46907999 | phosphoribosylformylglycinamidine synthase II [Listeria monocytogenes str. 4b F2365]                  | 1E-20     | 1E-38       | 19.39   | 10  | 31.838   | 19  | 0.01159   | 2.3   |
| 46908007 | HD domain protein [Listeria monocytogenes str. 4b F2365]                                              | 0.0001    | 1E-10       | 1.534   | 1   | 5.51     | 2   | 0.02677   | 2.3   |
| 46908032 | signal recognition particle protein [Listeria monocytogenes str. 4b F2365]                            | 0.0001    | 1E-20       | 3.726   | 2   | 17.455   | 10  | 0.00091   | 1.6   |
| 46908041 | fatty acid:phospholipid synthase protein [Listeria monocytogenes str. 4b F2365]                       | 0.0001    | 1E-20       | 3.891   | 2   | 17.258   | 10  | 9.51E-05  | 2.4   |
| 46908056 | rimosome assembly protein PrtA [Listeria monocytogenes str. 4b F2365]                                 | 0.0001    | 1E-16       | 4.092   | 2   | 13.934   | 8   | 0.01414   | 3.1   |
| 46908067 | carbamoyl-phosphate synthase large subunit [Listeria monocytogenes str. 4b F2365]                     | 0.0000001 | 1E-10       | 1.219   | 1   | 17.086   | 5   | 0.000956  | 2.2   |
| 46908104 | phosphoglucosyltransferase/phosphotransferase family protein [Listeria monocytogenes str. 4b F2365]   | 0.01      | 1E-10       | 1.897   | 1   | 9.213    | 5   | 0.02289   | 2.1   |
| 46908119 | hypothetical protein LMOQ2365_1916 [Listeria monocytogenes str. 4b F2365]                             | 1E-18     | 1E-42       | 18.374  | 9   | 42.125   | 21  | 7.05E-05  | 5.2   |
| 46908132 | ATP-dependent DNA helicase [Listeria monocytogenes str. 4b F2365]                                     | 0.01      | 1E-28       | 1.384   | 1   | 24.817   | 14  | 5.40E-06  | 3.2   |
| 46908150 | formate acetyltransferase [Listeria monocytogenes str. 4b F2365]                                      | 0.01      | 1E-18       | 1.865   | 1   | 8.067    | 9   | 0.000769  | 2.1   |
| 46908156 | 3-phosphoshikimate 1-carboxyvinyltransferase [Listeria monocytogenes str. 4b F2365]                   | 0.01      | 1E-18       | 1.895   | 1   | 18.818   | 9   | 2.67E-05  | 2.2   |
| 46908188 | phosphotransferase [Listeria monocytogenes str. 4b F2365]                                             | 1E-14     | 1E-34       | 22.525  | 7   | 58.944   | 17  | 0.000743  | 2.3   |
| 46908213 | ketol-acid reductoisomerase [Listeria monocytogenes str. 4b F2365]                                    | 0.01      | 1E-12       | 1.408   | 1   | 9.154    | 6   | 0.02419   | 2.2   |
| 46908222 | deoxyribonucleic acid phosphatase [Listeria monocytogenes str. 4b F2365]                              | 0.0001    | 1E-44       | 24.506  | 7   | 17.086   | 5   | 0.000769  | 2.1   |
| 46908245 | cold-shock domain family protein [Listeria monocytogenes str. 4b F2365]                               | 1E-10     | 1E-44       | 24.506  | 7   | 84.765   | 22  | 1.11E-07  | 4.1   |
| 46908254 | quinolinate synthetase [Listeria monocytogenes str. 4b F2365]                                         | 0.0001    | 1E-10       | 1.352   | 2   | 7.911    | 5   | 0.03948   | 2.5   |
| 46908285 | daunorubicin resistance protein [Listeria monocytogenes str. 4b F2365]                                | 0.0000001 | 1E-22       | 6.872   | 4   | 19.051   | 11  | 0.02546   | 3.2   |
| 46908303 | chaperone GroEL [Listeria monocytogenes str. 4b F2365]                                                | 1E-208    | 1E-323      | 0       | 104 | 793.723  | 209 | 2.37E-16  | 3.9   |
| 46908304 | co-chaperonin GroES [Listeria monocytogenes str. 4b F2365]                                            | 1E-44     | 1E-70       | 69.721  | 22  | 115.526  | 35  | 0.001964  | 3.9   |
| 46908326 | argininosuccinate lyase [Listeria monocytogenes str. 4b F2365]                                        | 0.0001    | 1E-18       | 3.291   | 2   | 15.37    | 9   | 0.02303   | 2.2   |
| 46908338 | phosphate acetyltransferase [Listeria monocytogenes str. 4b F2365]                                    | 0.01      | 1E-20       | 1.565   | 1   | 26.143   | 10  | 1.25E-05  | 2.1   |
| 46908355 | hypothetical protein LMOQ2365_2157 [Listeria monocytogenes str. 4b F2365]                             | 0.0000001 | 1E-26       | 8.262   | 1   | 26.562   | 10  | 0.000769  | 2.1   |
| 46908377 | transcriptional regulator, GmrA family [Listeria monocytogenes str. 4b F2365]                         | 0.01      | 1E-10       | 1.777   | 1   | 10.715   | 5   | 0.01427   | 3.5,2 |
| 46908405 | propiolate CoA-transferase [Listeria monocytogenes str. 4b F2365]                                     | 0.000001  | 1E-18       | 4.745   | 3   | 17.749   | 9   | 0.004572  | 2.1   |
| 46908412 | cell wall surface anchor family protein [Listeria monocytogenes str. 4b F2365]                        | 0.0000001 | 1E-22       | 7.756   | 4   | 21.512   | 11  | 0.006577  | 1.8   |
| 46908419 | hypothetical protein LMOQ2365_2218 [Listeria monocytogenes str. 4b F2365]                             | 0.01      | 1E-24       | 2.614   | 1   | 29.131   | 12  | 5.53E-06  | 1.8   |
| 46908420 | hypothetical protein LMOQ2365_2219 [Listeria monocytogenes str. 4b F2365]                             | 0.0000001 | 1E-28       | 1.887   | 1   | 10.033   | 9   | 0.0108    | 7     |
| 46908430 | oligopeptide ABC transporter, oligopeptide-binding protein [Listeria monocytogenes str. 4b F2365]     | 1E-232    | 0           | 441.797 | 116 | 2091.823 | 266 | 2.20E-16  | 1.8   |
| 46908440 | clpB protein [Listeria monocytogenes str. 4b F2365]                                                   | 1E-10     | 1E-32       | 8.288   | 5   | 29.938   | 16  | 0.007823  | 4.1   |
| 46908453 | protein export protein [Listeria monocytogenes str. 4b F2365]                                         | 1E-50     | 1E-82       | 104.762 | 25  | 146.277  | 41  | 0.01276   | 1.6   |
| 46908459 | laminaric hydrolase, class II [Listeria monocytogenes str. 4b F2365]                                  | 0.01      | 1E-10       | 1.702   | 1   | 8.102    | 8   | 0.000956  | 2.2   |
| 46908489 | intracellular protease, PipI family [Listeria monocytogenes str. 4b F2365]                            | 1E-42     | 1E-64       | 77.805  | 21  | 122.073  | 32  | 0.008263  | 5.2   |
| 46908501 | ATP-dependent nuclease, subunit B [Listeria monocytogenes str. 4b F2365]                              | 0.000001  | 1E-30       | 5.765   | 3   | 32.267   | 15  | 0.000109  | 2.3   |
| 46908509 | hypothetical protein LMOQ2365_2309 [Listeria monocytogenes str. 4b F2365]                             | 1E-12     | 1E-28       | 10.384  | 6   | 23.6     | 14  | 0.004352  | 5.2   |
| 46908531 | glucose-6-phosphate isomerase [Listeria monocytogenes str. 4b F2365]                                  | 1E-50     | 1E-76       | 97.676  | 25  | 68.715   | 69  | 0.02729   | 5.2   |
| 46908582 | FuS assembly protein SufB [Listeria monocytogenes str. 4b F2365]                                      | 0.01      | 1E-10       | 1.746   | 1   | 9.16     | 5   | 0.01298   | 5.2   |
| 46908588 | ABC transporter, substrate-binding protein [Listeria monocytogenes str. 4b F2365]                     | 1E-28     | 1E-56       | 49.83   | 14  | 99.098   | 28  | 4.32E-05  | 2.2   |
| 46908628 | endolase [Listeria monocytogenes str. 4b F2365]                                                       | 1E-94     | 1E-168      | 187.031 | 47  | 331.325  | 84  | 2.31E-06  | 2.1,2 |
| 46908629 | phosphoglucosyltransferase [Listeria monocytogenes str. 4b F2365]                                     | 1E-62     | 1E-116      | 128.368 | 31  | 128.368  | 58  | 2.77E-07  | 7     |
| 46908630 | triisophosphate isomerase [Listeria monocytogenes str. 4b F2365]                                      | 1E-10     | 1E-28       | 13.247  | 5   | 44.292   | 14  | 0.000997  | 2.1,2 |
| 46908631 | phosphoglycerate kinase [Listeria monocytogenes str. 4b F2365]                                        | 1E-14     | 1E-44       | 24.379  | 7   | 81.368   | 22  | 2.35E-06  | 2.1   |
| 46908632 | glycerolaldehyde-3-phosphate dehydrogenase [Listeria monocytogenes str. 4b F2365]                     | 1E-20     | 1E-40       | 34.226  | 10  | 81.468   | 20  | 0.00153   | 2.1,2 |
| 46908653 | PaqC domain protein [Listeria monocytogenes str. 4b F2365]                                            | 0.01      | 1E-12       | 2.632   | 1   | 6        | 2   | 0.01897   | 5.2   |
| 46908659 | hypothetical protein LMOQ2365_2460 [Listeria monocytogenes str. 4b F2365]                             | 1E-10     | 1E-26       | 10.744  | 5   | 24.912   | 13  | 0.02014   | 5.2   |
| 46908683 | ribosomal subunit interface protein [Listeria monocytogenes str. 4b F2365]                            | 1E-16     | 1E-34       | 28.936  | 8   | 62.931   | 17  | 0.00115   | 5.2   |
| 46908696 | (3R)-hydroxymyristoyl-acyl-carrier-protein dehydratase [Listeria monocytogenes str. 4b F2365]         | 0.01      | 1E-10       | 3.825   | 1   | 17.921   | 5   | 0.04424   | 2.4   |
| 46908699 | UDP-N-acetylglucosamine 1-carboxyvinyltransferase [Listeria monocytogenes str. 4b F2365]              | 0.01      | 1E-10       | 1.865   | 1   | 5.208    | 1   | 0.02729   | 5.2   |
| 46908713 | Sua5/YcoY/VacY/wKc family protein [Listeria monocytogenes str. 4b F2365]                              | 0.01      | 0.0000001   | 1.718   | 1   | 7.048    | 4   | 0.02383   | 3.7,3 |
| 46908727 | fructose-bisphosphate aldolase, putative [Listeria monocytogenes str. 4b F2365]                       | 1E-18     | 1E-48       | 19.143  | 9   | 59.262   | 24  | 1.28E-05  | 2.1   |
| 46908728 | conserved hypothetical protein TIGR00147 [Listeria monocytogenes str. 4b F2365]                       | 0.0001    | 1E-20       | 3.746   | 2   | 19.778   | 10  | 0.000769  | 2.1   |
| 46908730 | CTP synthetase [Listeria monocytogenes str. 4b F2365]                                                 | 0.0001    | 1E-20       | 4.662   | 2   | 17.5     | 10  | 0.006264  | 5.2   |
| 46908740 | HD domain protein [Listeria monocytogenes str. 4b F2365]                                              | 0.0001    | 1E-24       | 1.887   | 1   | 22.735   | 9   | 8.80E-08  | 7     |
| 46908755 | formate dehydrogenase accessory protein [Listeria monocytogenes str. 4b F2365]                        | 0.01      | 0.0000001   | 1.779   | 1   | 6.332    | 4   | 0.03789   | 7     |
| 46908756 | hypothetical protein LMOQ2365_2557 [Listeria monocytogenes str. 4b F2365]                             | 0.0000001 | 1E-16       | 7.532   | 4   | 15.88    | 8   | 0.03864   | 5.2   |
| 46908757 | formate dehydrogenase, alpha subunit [Listeria monocytogenes str. 4b F2365]                           | 0.01      | 1E-10       | 1.415   | 1   | 9.596    | 5   | 0.04961   | 2.1,1 |
| 46908759 | incomycin resistance protein LamR [Listeria monocytogenes str. 4b F2365]                              | 0.0001    | 1E-12       | 3.855   | 2   | 11.345   | 7   | 0.0143    | 6     |
| 46908778 | DNA-directed RNA polymerase alpha subunit [Listeria monocytogenes str. 4b F2365]                      | 1E-14     | 1E-14       | 1.587   | 1   | 1.587    | 1   | 0.0061    | 3.5,3 |
| 46908789 | 50S ribosomal protein L6 [Listeria monocytogenes str. 4b F2365]                                       | 0.0001    | 0.0000001   | 3.068   | 2   | 12.084   | 7   | 0.03902   | 3.7,1 |
| 46908809 | lipoprotein, putative [Listeria monocytogenes str. 4b F2365]                                          | 1E-62     | 1E-88       | 105.247 | 31  | 155.466  | 44  | 2.61E-05  | 1.8   |
| 46908810 | pyridine nucleotide-dependent oxidoreductase family protein [Listeria monocytogenes str. 4b F2365]    | 0.000001  | 1E-20       | 7.023   | 3   | 3.57     | 2   | 0.002303  | 1.4   |
| 46908830 | hypothetical protein LMOQ2365_2631 [Listeria monocytogenes str. 4b F2365]                             | 0.01      | 1E-10       | 1.777   | 1   | 7.959    | 5   | 0.0253    | 6     |
| 46908860 | potassium-transporting ATPase subunit B [Listeria monocytogenes str. 4b F2365]                        | 0.000001  | 1E-32       | 6.534   | 3   | 34.366   | 16  | 2.18E-07  | 1.2   |
| 46908869 | autolysin [Listeria monocytogenes str. 4b F2365]                                                      | 1E-14     | 1E-48       | 20.48   | 7   | 94.632   | 24  | 4.62E-09  | 1.1   |
| 46908871 | thymidylate kinase [Listeria monocytogenes str. 4b F2365]                                             | 0.000001  | 1E-10       |         |     |          |     |           |       |

|          |                                                                                   |          |   |   |       |   |       |
|----------|-----------------------------------------------------------------------------------|----------|---|---|-------|---|-------|
| 16802351 | hypothetical protein lmo0305 [Listeria monocytogenes EGD-e]                       | 0.01     | 0 | 0 | 1.799 | 1 | 2.2   |
| 16802359 | hypothetical protein lmo0314 [Listeria monocytogenes EGD-e]                       | 0.01     | 0 | 0 | 1.774 | 1 | 5.2   |
| 16802361 | hydroxyethylglutathione kinase [Listeria monocytogenes EGD-e]                     | 0.01     | 0 | 0 | 1.884 | 1 | 2.5   |
| 16802363 | hypothetical protein lmo0318 [Listeria monocytogenes EGD-e]                       | 0.0001   | 0 | 0 | 3.923 | 2 | 2.5   |
| 16802370 | hypothetical protein lmo0325 [Listeria monocytogenes EGD-e]                       | 0.0001   | 0 | 0 | 4.439 | 2 | 3.5,2 |
| 16802385 | hypothetical protein lmo0340 [Listeria monocytogenes EGD-e]                       | 0.01     | 0 | 0 | 1.362 | 1 | 6     |
| 16802395 | hypothetical protein lmo0350 [Listeria monocytogenes EGD-e]                       | 0.01     | 0 | 0 | 1.512 | 1 | 5.1   |
| 16802420 | hypothetical protein lmo0375 [Listeria monocytogenes EGD-e]                       | 0.0001   | 0 | 0 | 3.001 | 2 | 6     |
| 16802429 | hypothetical protein lmo0384 [Listeria monocytogenes EGD-e]                       | 0.01     | 0 | 0 | 1.421 | 1 | 2.1,1 |
| 16802437 | hypothetical protein lmo0392 [Listeria monocytogenes EGD-e]                       | 0.0001   | 0 | 0 | 3.548 | 2 | 5.2   |
| 16802453 | hypothetical protein lmo0408 [Listeria monocytogenes EGD-e]                       | 0.01     | 0 | 0 | 1.314 | 1 | 5.2   |
| 16802461 | hypothetical protein lmo0417 [Listeria monocytogenes EGD-e]                       | 0.01     | 0 | 0 | 1.158 | 1 | 5.1,1 |
| 16802470 | hypothetical protein lmo0426 [Listeria monocytogenes EGD-e]                       | 0.0001   | 0 | 0 | 3.869 | 2 | 1.2   |
| 16802480 | hypothetical protein lmo0436 [Listeria monocytogenes EGD-e]                       | 0.0001   | 0 | 0 | 3.372 | 2 | 5.2   |
| 16802486 | hypothetical protein lmo0442 [Listeria monocytogenes EGD-e]                       | 0.01     | 0 | 0 | 1.792 | 1 | 6     |
| 16802494 | hypothetical protein lmo0450 [Listeria monocytogenes EGD-e]                       | 0.01     | 0 | 0 | 2.035 | 1 | 5.2   |
| 16802495 | hypothetical protein lmo0451 [Listeria monocytogenes EGD-e]                       | 0.0001   | 0 | 0 | 3.628 | 2 | 6     |
| 16802501 | hypothetical protein lmo0457 [Listeria monocytogenes EGD-e]                       | 0.0001   | 0 | 0 | 5.049 | 2 | 5.2   |
| 16802507 | hypothetical protein lmo0463 [Listeria monocytogenes EGD-e]                       | 0.01     | 0 | 0 | 1.473 | 1 | 5.2   |
| 16802519 | hypothetical protein lmo0476 [Listeria monocytogenes EGD-e]                       | 0.01     | 0 | 0 | 1.319 | 1 | 4.2   |
| 16802521 | putative secreted protein [Listeria monocytogenes EGD-e]                          | 0.0001   | 0 | 0 | 2.985 | 2 | 5.2   |
| 16802523 | hypothetical protein lmo0480 [Listeria monocytogenes EGD-e]                       | 0.01     | 0 | 0 | 2.057 | 1 | 3.5,2 |
| 16802535 | hypothetical protein lmo0492 [Listeria monocytogenes EGD-e]                       | 0.0001   | 0 | 0 | 3.151 | 2 | 3.5,2 |
| 16802536 | hypothetical protein lmo0493 [Listeria monocytogenes EGD-e]                       | 0.0001   | 0 | 0 | 3.318 | 2 | 4.2   |
| 16802554 | hypothetical protein lmo0511 [Listeria monocytogenes EGD-e]                       | 0.01     | 0 | 0 | 1.546 | 1 | 5.2   |
| 16802562 | hypothetical protein lmo0519 [Listeria monocytogenes EGD-e]                       | 0.01     | 0 | 0 | 1.405 | 1 | 7     |
| 16802565 | hypothetical protein lmo0522 [Listeria monocytogenes EGD-e]                       | 0.01     | 0 | 0 | 1.742 | 1 | 3.5,2 |
| 16802567 | hypothetical protein lmo0524 [Listeria monocytogenes EGD-e]                       | 0.01     | 0 | 0 | 1.781 | 1 | 5.2   |
| 16802571 | hypothetical protein lmo0528 [Listeria monocytogenes EGD-e]                       | 0.01     | 0 | 0 | 1.239 | 1 | 1.8   |
| 16802576 | hypothetical protein lmo0533 [Listeria monocytogenes EGD-e]                       | 0.01     | 0 | 0 | 1.631 | 1 | 5.2   |
| 16802577 | hypothetical protein lmo0534 [Listeria monocytogenes EGD-e]                       | 0.000001 | 0 | 0 | 6.805 | 3 | 5.2   |
| 16802583 | hypothetical protein lmo0540 [Listeria monocytogenes EGD-e]                       | 0.0001   | 0 | 0 | 3.653 | 1 | 1.1   |
| 16802587 | hypothetical protein lmo0544 [Listeria monocytogenes EGD-e]                       | 0.01     | 0 | 0 | 2.251 | 1 | 1.2   |
| 16802593 | peptidoglycan bound protein (LPXTG motif) [Listeria monocytogenes EGD-e]          | 0.01     | 0 | 0 | 1.702 | 1 | 1.8   |
| 16802597 | hypothetical protein lmo0554 [Listeria monocytogenes EGD-e]                       | 0.01     | 0 | 0 | 1.655 | 1 | 2.1,1 |
| 16802599 | hypothetical protein lmo0556 [Listeria monocytogenes EGD-e]                       | 0.0001   | 0 | 0 | 3.191 | 2 | 2.1,2 |
| 16802624 | hypothetical protein lmo0581 [Listeria monocytogenes EGD-e]                       | 0.01     | 0 | 0 | 1.168 | 1 | 3.5,2 |
| 16802640 | hypothetical protein lmo0597 [Listeria monocytogenes EGD-e]                       | 0.000001 | 0 | 0 | 4.679 | 3 | 3.5,2 |
| 16802643 | hypothetical protein lmo0601 [Listeria monocytogenes EGD-e]                       | 0.01     | 0 | 0 | 2.15  | 1 | 1.8   |
| 16802656 | hypothetical protein lmo0614 [Listeria monocytogenes EGD-e]                       | 0.01     | 0 | 0 | 1.551 | 1 | 5.2   |
| 16802662 | hypothetical protein lmo0620 [Listeria monocytogenes EGD-e]                       | 0.01     | 0 | 0 | 1.702 | 1 | 6     |
| 16802670 | hypothetical protein lmo0628 [Listeria monocytogenes EGD-e]                       | 0.01     | 0 | 0 | 2.179 | 1 | 5.1   |
| 16802671 | hypothetical protein lmo0629 [Listeria monocytogenes EGD-e]                       | 0.01     | 0 | 0 | 1.426 | 1 | 5.2   |
| 16802684 | hypothetical protein lmo0642 [Listeria monocytogenes EGD-e]                       | 0.01     | 0 | 0 | 1.718 | 1 | 5.2   |
| 16802691 | hypothetical protein lmo0651 [Listeria monocytogenes EGD-e]                       | 0.0001   | 0 | 0 | 2.875 | 1 | 5.2   |
| 16802707 | hypothetical protein lmo0665 [Listeria monocytogenes EGD-e]                       | 0.0001   | 0 | 0 | 2.93  | 2 | 3.8   |
| 16802709 | hypothetical protein lmo0667 [Listeria monocytogenes EGD-e]                       | 0.000001 | 0 | 0 | 5.748 | 3 | 1.2   |
| 16802718 | flagellar biosynthesis protein [Listeria monocytogenes EGD-e]                     | 0.01     | 0 | 0 | 2.061 | 1 | 6     |
| 16802725 | hypothetical protein lmo0683 [Listeria monocytogenes EGD-e]                       | 0.0001   | 0 | 0 | 3.241 | 2 | 3.5,2 |
| 16802736 | hypothetical protein lmo0694 [Listeria monocytogenes EGD-e]                       | 0.01     | 0 | 0 | 2.467 | 1 | 6     |
| 16802745 | hypothetical protein lmo0703 [Listeria monocytogenes EGD-e]                       | 0.01     | 0 | 0 | 1.558 | 1 | 6     |
| 16802746 | hypothetical protein lmo0704 [Listeria monocytogenes EGD-e]                       | 0.0001   | 0 | 0 | 4.263 | 2 | 6     |
| 16802759 | hypothetical protein lmo0717 [Listeria monocytogenes EGD-e]                       | 0.01     | 0 | 0 | 1.484 | 1 | 4.3   |
| 16802770 | hypothetical protein lmo0728 [Listeria monocytogenes EGD-e]                       | 0.01     | 0 | 0 | 1.885 | 1 | 2.5   |
| 16802775 | hypothetical protein lmo0733 [Listeria monocytogenes EGD-e]                       | 0.01     | 0 | 0 | 2.189 | 1 | 3.5,2 |
| 16802794 | hypothetical protein lmo0752 [Listeria monocytogenes EGD-e]                       | 0.01     | 0 | 0 | 1.253 | 1 | 4.2   |
| 16802797 | hypothetical protein lmo0755 [Listeria monocytogenes EGD-e]                       | 0.0001   | 0 | 0 | 4.049 | 1 | 5.2   |
| 16802800 | hypothetical protein lmo0758 [Listeria monocytogenes EGD-e]                       | 0.0001   | 0 | 0 | 3.993 | 2 | 5.2   |
| 16802813 | hypothetical protein lmo0771 [Listeria monocytogenes EGD-e]                       | 0.0001   | 0 | 0 | 3.306 | 2 | 6     |
| 16802816 | hypothetical protein lmo0774 [Listeria monocytogenes EGD-e]                       | 0.01     | 0 | 0 | 1.545 | 1 | 5.2   |
| 16802836 | hypothetical protein lmo0794 [Listeria monocytogenes EGD-e]                       | 0.01     | 0 | 0 | 1.905 | 1 | 5.2   |
| 16802848 | hypothetical protein lmo0806 [Listeria monocytogenes EGD-e]                       | 0.01     | 0 | 0 | 1.158 | 1 | 3.5,2 |
| 16802855 | hypothetical protein lmo0813 [Listeria monocytogenes EGD-e]                       | 0.0001   | 0 | 0 | 4.858 | 2 | 2.1,1 |
| 16802866 | hypothetical protein lmo0824 [Listeria monocytogenes EGD-e]                       | 0.0001   | 0 | 0 | 4.209 | 2 | 6     |
| 16802875 | hypothetical protein lmo0833 [Listeria monocytogenes EGD-e]                       | 0.01     | 0 | 0 | 2.019 | 1 | 3.5,2 |
| 16802879 | hypothetical protein lmo0838 [Listeria monocytogenes EGD-e]                       | 0.01     | 0 | 0 | 2.491 | 1 | 5.2   |
| 16802884 | hypothetical protein lmo0843 [Listeria monocytogenes EGD-e]                       | 0.01     | 0 | 0 | 1.835 | 1 | 5.2   |
| 16802895 | hypothetical protein lmo0854 [Listeria monocytogenes EGD-e]                       | 0.0001   | 0 | 0 | 2.664 | 2 | 3.9   |
| 16802898 | hypothetical protein lmo0857 [Listeria monocytogenes EGD-e]                       | 0.01     | 0 | 0 | 1.855 | 1 | 2.4   |
| 16802904 | hypothetical protein lmo0863 [Listeria monocytogenes EGD-e]                       | 0.0001   | 0 | 0 | 3.162 | 2 | 6     |
| 16802911 | hypothetical protein lmo0870 [Listeria monocytogenes EGD-e]                       | 0.0001   | 0 | 0 | 4.771 | 2 | 5.2   |
| 16802923 | hypothetical protein lmo0882 [Listeria monocytogenes EGD-e]                       | 0.0001   | 0 | 0 | 5.4   | 2 | 5.2   |
| 16802931 | hypothetical protein lmo0890 [Listeria monocytogenes EGD-e]                       | 0.0001   | 0 | 0 | 3.158 | 2 | 4.1   |
| 16802936 | sigma factor 32 [Listeria monocytogenes EGD-e]                                    | 0.0001   | 0 | 0 | 2.019 | 2 | 3.5,1 |
| 16802942 | hypothetical protein lmo0901 [Listeria monocytogenes EGD-e]                       | 0.01     | 0 | 0 | 2.351 | 1 | 1.2   |
| 16802949 | hypothetical protein lmo0908 [Listeria monocytogenes EGD-e]                       | 0.0001   | 0 | 0 | 2.895 | 2 | 5.2   |
| 16802951 | hypothetical protein lmo0910 [Listeria monocytogenes EGD-e]                       | 0.000001 | 0 | 0 | 6.456 | 3 | 5.2   |
| 16802957 | hypothetical protein lmo0916 [Listeria monocytogenes EGD-e]                       | 0.01     | 0 | 0 | 1.561 | 1 | 1.2   |
| 16802958 | hypothetical protein lmo0917 [Listeria monocytogenes EGD-e]                       | 0.01     | 0 | 0 | 1.566 | 1 | 2.1,1 |
| 16802962 | hypothetical protein lmo0921 [Listeria monocytogenes EGD-e]                       | 0.0001   | 0 | 0 | 3.529 | 2 | 5.2   |
| 16802965 | hypothetical protein lmo0925 [Listeria monocytogenes EGD-e]                       | 0.01     | 0 | 0 | 1.355 | 1 | 5.2   |
| 16802983 | hypothetical protein lmo0945 [Listeria monocytogenes EGD-e]                       | 0.000001 | 0 | 0 | 6.036 | 1 | 1.1   |
| 16802990 | hypothetical protein lmo0950 [Listeria monocytogenes EGD-e]                       | 0.01     | 0 | 0 | 1.461 | 1 | 5.2   |
| 16802998 | hypothetical protein lmo0958 [Listeria monocytogenes EGD-e]                       | 0.01     | 0 | 0 | 1.619 | 1 | 3.5,2 |
| 16803000 | hypothetical protein lmo0960 [Listeria monocytogenes EGD-e]                       | 0.0001   | 0 | 0 | 2.886 | 2 | 2.2   |
| 16803001 | hypothetical protein lmo0961 [Listeria monocytogenes EGD-e]                       | 1E-10    | 0 | 0 | 9.724 | 5 | 5.2   |
| 16803041 | hypothetical protein lmo1001 [Listeria monocytogenes EGD-e]                       | 0.01     | 0 | 0 | 2.176 | 1 | 5.2   |
| 16803044 | hypothetical protein lmo1004 [Listeria monocytogenes EGD-e]                       | 0.000001 | 0 | 0 | 4.313 | 3 | 5.2   |
| 16803049 | hypothetical protein lmo1009 [Listeria monocytogenes EGD-e]                       | 0.0001   | 0 | 0 | 3.481 | 2 | 5.2   |
| 16803051 | hypothetical protein lmo1011 [Listeria monocytogenes EGD-e]                       | 0.01     | 0 | 0 | 1.288 | 1 | 2.2   |
| 16803062 | hypothetical protein lmo1022 [Listeria monocytogenes EGD-e]                       | 0.01     | 0 | 0 | 1.423 | 1 | 3.5,2 |
| 16803063 | hypothetical protein lmo1023 [Listeria monocytogenes EGD-e]                       | 0.01     | 0 | 0 | 1.784 | 1 | 1.2   |
| 16803064 | hypothetical protein lmo1024 [Listeria monocytogenes EGD-e]                       | 0.01     | 0 | 0 | 1.916 | 1 | 6     |
| 16803067 | hypothetical protein lmo1027 [Listeria monocytogenes EGD-e]                       | 0.0001   | 0 | 0 | 4.403 | 2 | 5.2   |
| 16803075 | hypothetical protein lmo1035 [Listeria monocytogenes EGD-e]                       | 0.01     | 0 | 0 | 1.518 | 1 | 1.2   |
| 16803078 | hypothetical protein lmo1038 [Listeria monocytogenes EGD-e]                       | 0.0001   | 0 | 0 | 3.429 | 2 | 2.5   |
| 16803098 | hypothetical protein lmo1058 [Listeria monocytogenes EGD-e]                       | 0.0001   | 0 | 0 | 3.361 | 2 | 5.2   |
| 16803133 | NAD(+) synthetase [Listeria monocytogenes EGD-e]                                  | 0.01     | 0 | 0 | 1.554 | 1 | 2.5   |
| 16803134 | hypothetical protein lmo1094 [Listeria monocytogenes EGD-e]                       | 0.0001   | 0 | 0 | 7.444 | 2 | 5.2   |
| 16803160 | hypothetical protein lmo1120 [Listeria monocytogenes EGD-e]                       | 0.01     | 0 | 0 | 1.655 | 1 | 5.1   |
| 16803164 | hypothetical protein lmo1124 [Listeria monocytogenes EGD-e]                       | 0.01     | 0 | 0 | 1.472 | 1 | 5.1   |
| 16803169 | hypothetical protein lmo1129 [Listeria monocytogenes EGD-e]                       | 0.01     | 0 | 0 | 1.489 | 1 | 5.2   |
| 16803171 | hypothetical protein lmo1131 [Listeria monocytogenes EGD-e]                       | 0.01     | 0 | 0 | 1.561 | 1 | 1.2   |
| 16803177 | hypothetical protein lmo1137 [Listeria monocytogenes EGD-e]                       | 0.01     | 0 | 0 | 2.171 | 1 | 6     |
| 16803181 | hypothetical protein lmo1141 [Listeria monocytogenes EGD-e]                       | 0.01     | 0 | 0 | 1.882 | 1 | 2.5   |
| 16803187 | hypothetical protein lmo1147 [Listeria monocytogenes EGD-e]                       | 0.0001   | 0 | 0 | 4.79  | 2 | 2.5   |
| 16803189 | hypothetical protein lmo1149 [Listeria monocytogenes EGD-e]                       | 0.0001   | 0 | 0 | 1.281 | 1 | 2.5   |
| 16803194 | hypothetical protein lmo1154 [Listeria monocytogenes EGD-e]                       | 0.01     | 0 | 0 | 1.468 | 1 | 2.1,1 |
| 16803198 | hypothetical protein lmo1158 [Listeria monocytogenes EGD-e]                       | 0.01     | 0 | 0 | 1.688 | 1 | 2.1,1 |
| 16803203 | hypothetical protein lmo1163 [Listeria monocytogenes EGD-e]                       | 0.01     | 0 | 0 | 1.395 | 1 | 2.1,1 |
| 16803204 | highly similar to Salmonella enterica PabI protein [Listeria monocytogenes EGD-e] | 0.01     | 0 | 0 | 1.647 | 1 | 2.1,1 |
| 16803211 | hypothetical protein lmo1173 [Listeria monocytogenes EGD-e]                       | 0.000001 | 0 | 0 | 4.882 | 3 | 3.3   |
| 16803217 | hypothetical protein lmo1177 [Listeria monocytogenes EGD-e]                       | 0.01     | 0 | 0 | 2.456 | 1 | 2.1,1 |
| 16803222 | hypothetical protein lmo1182 [Listeria monocytogenes EGD-e]                       | 0.01     | 0 | 0 | 1.549 | 1 | 2.1,1 |
| 16803226 | hypothetical protein lmo1186 [Listeria monocytogenes EGD-e]                       | 0.01     | 0 | 0 | 2.452 | 1 | 2.1,1 |
| 16803227 | hypothetical protein lmo1187 [Listeria monocytogenes EGD-e]                       | 0.01     | 0 | 0 | 1.428 | 1 | 2.1,1 |
| 16803242 | hypothetical protein lmo1202 [Listeria monocytogenes EGD-e]                       | 0.01     | 0 | 0 | 1.46  | 1 | 2.5   |
| 16803248 | coyribic acid synthase [Listeria monocytogenes EGD-e]                             | 0.0001   | 0 | 0 | 3.265 | 2 | 2.5   |
| 16803249 | hypothetical protein lmo1209 [Listeria monocytogenes EGD-e]                       | 0.01     | 0 | 0 | 1.384 | 1 | 5.2   |
| 16803252 | hypothetical protein lmo1212 [Listeria monocytogenes EGD-e]                       | 0.01     | 0 | 0 | 2.053 | 1 | 5.2   |
| 16803254 | hypothetical protein lmo1214 [Listeria monocytogenes EGD-e]                       | 0.01     | 0 | 0 | 2.02  | 1 | 6     |
| 16803255 | hypothetical protein lmo1215 [Listeria monocytogenes EGD-e]                       | 0.0001   | 0 | 0 | 3.047 | 2 | 1.1   |
| 16803260 | hypothetical protein lmo1220 [Listeria monocytogenes EGD-e]                       | 0.0001   | 0 | 0 | 4.242 | 2 | 5.2   |
| 16803262 | hypothetical protein lmo1223 [Listeria monocytogenes EGD-e]                       | 0.01     | 0 | 0 | 1.748 | 1 | 1.2   |
| 16803267 | uracil-DNA glycosylase [Listeria monocytogenes EGD-e]                             | 0.01     | 0 | 0 | 1.744 | 1 | 3.2   |
| 16803301 | hypothetical protein lmo1261 [Listeria monocytogenes EGD-e]                       | 0.01     | 0 | 0 | 1.37  | 1 | 6     |
| 16803305 | hypothetical protein lmo1265 [Listeria monocytogenes EGD-e]                       | 0.01     | 0 | 0 | 1.621 | 1 | 1.2   |
| 16803306 | hypothetical protein lmo1266 [Listeria monocytogenes EGD-e]                       | 0.01     | 0 | 0 | 1.781 | 1 | 5.2   |
| 16803320 | transcriptional repressor CsdY [Listeria monocytogenes EGD-e]                     | 0.01     | 0 | 0 | 1.927 | 1 | 3.3   |
| 16803325 | hypothetical protein lmo1285 [Listeria monocytogenes EGD-e]                       | 0.01     | 0 | 0 | 1.582 | 1 | 5.2   |
| 16803332 | hypothetical protein lmo1292 [Listeria monocytogenes EGD-e]                       | 0.0001   | 0 | 0 | 3.188 | 2 | 2.4   |
| 16803334 | hypothetical protein lmo1294 [Listeria monocytogenes EGD-e]                       | 0.01     | 0 | 0 | 1.652 | 1 | 3.6   |
| 16803336 | hypothetical protein lmo1296 [Listeria monocytogenes EGD-e]                       | 0.0001   | 0 | 0 | 2.498 | 2 | 5.2   |
| 16803342 | LexA repressor [Listeria monocytogenes EGD-e]                                     | 0.01     | 0 | 0 | 1.276 | 1 | 3.5,2 |
| 16803348 | hypothetical protein lmo1308 [Listeria monocytogenes EGD-e]                       | 0.01     | 0 | 0 | 1.416 | 1 | 3.8   |
| 16803361 | hypothetical protein lmo1321 [Listeria monocytogenes EGD-e]                       | 0.0001   | 0 | 0 | 5.399 | 2 | 5.2   |
| 16803365 | hypothetical protein lmo1328 [Listeria monocytogenes EGD-e]                       | 0.01     | 0 | 0 | 1.901 | 1 | 5.2   |
| 16803372 | hypothetical protein lmo1332 [Listeria monocytogenes EGD-e]                       | 0.01     | 0 | 0 | 1.898 | 1 | 7     |
| 16803377 | hypothetical protein lmo1337 [Listeria monocytogenes EGD-e]                       | 0.0001   | 0 | 0 | 2.861 | 2 | 5.2   |
| 16803382 | hypothetical                                                                      |          |   |   |       |   |       |

|          |                                                                                   |           |   |   |        |   |      |
|----------|-----------------------------------------------------------------------------------|-----------|---|---|--------|---|------|
| 16803504 | hypothetical protein lmo1464 [Listeria monocytogenes EGD-e]                       | 0.01      | 0 | 0 | 1.404  | 1 | 2.4  |
| 16803510 | hypothetical protein lmo1470 [Listeria monocytogenes EGD-e]                       | 0.0001    | 0 | 0 | 3.554  | 2 | 7    |
| 16803511 | ribosomal protein L11 methyltransferase [Listeria monocytogenes EGD-e]            | 0.01      | 0 | 0 | 1.791  | 1 | 3.71 |
| 16803517 | hypothetical protein lmo1477 [Listeria monocytogenes EGD-e]                       | 0.01      | 0 | 0 | 1.261  | 1 | 2.11 |
| 16803528 | hypothetical protein lmo1488 [Listeria monocytogenes EGD-e]                       | 0.01      | 0 | 0 | 1.392  | 1 | 2.5  |
| 16803538 | hypothetical protein lmo1498 [Listeria monocytogenes EGD-e]                       | 0.01      | 0 | 0 | 1.568  | 1 | 4.5  |
| 16803553 | hypothetical protein lmo1513 [Listeria monocytogenes EGD-e]                       | 0.0001    | 0 | 0 | 2.788  | 2 | 2.5  |
| 16803556 | hypothetical protein lmo1516 [Listeria monocytogenes EGD-e]                       | 0.01      | 0 | 0 | 1.76   | 1 | 1.2  |
| 16803572 | hypothetical protein lmo1532 [Listeria monocytogenes EGD-e]                       | 0.01      | 0 | 0 | 2.124  | 1 | 3.3  |
| 16803579 | hypothetical protein lmo1539 [Listeria monocytogenes EGD-e]                       | 0.01      | 0 | 0 | 2.685  | 1 | 1.2  |
| 16803582 | hypothetical protein lmo1549 [Listeria monocytogenes EGD-e]                       | 0.0001    | 0 | 0 | 4.83   | 2 | 3.71 |
| 16803583 | sepium formation inhibitor [Listeria monocytogenes EGD-e]                         | 0.01      | 0 | 0 | 1.576  | 1 | 1.7  |
| 16803595 | uroporphyrinogen-III synthetase [Listeria monocytogenes EGD-e]                    | 0.01      | 0 | 0 | 1.632  | 1 | 2.5  |
| 16803596 | porphobilinogen deaminase [Listeria monocytogenes EGD-e]                          | 0.01      | 0 | 0 | 2.053  | 1 | 2.5  |
| 16803597 | glutaryl-tRNA reductase [Listeria monocytogenes EGD-e]                            | 0.000001  | 0 | 0 | 5.589  | 3 | 2.5  |
| 16803602 | hypothetical protein lmo1562 [Listeria monocytogenes EGD-e]                       | 0.01      | 0 | 0 | 1.576  | 1 | 7    |
| 16803603 | hypothetical protein lmo1563 [Listeria monocytogenes EGD-e]                       | 0.01      | 0 | 0 | 2.014  | 1 | 2.2  |
| 16803604 | hypothetical protein lmo1564 [Listeria monocytogenes EGD-e]                       | 0.01      | 0 | 0 | 1.22   | 1 | 3.2  |
| 16803606 | isocitrate dehydrogenase [Listeria monocytogenes EGD-e]                           | 0.0001    | 0 | 0 | 3.187  | 2 | 2.13 |
| 16803615 | hypothetical protein lmo1575 [Listeria monocytogenes EGD-e]                       | 0.01      | 0 | 0 | 1.784  | 1 | 5.2  |
| 16803622 | hypothetical protein lmo1582 [Listeria monocytogenes EGD-e]                       | 0.0001    | 0 | 0 | 4.665  | 2 | 3.2  |
| 16803625 | hypothetical protein lmo1585 [Listeria monocytogenes EGD-e]                       | 1E-10     | 0 | 0 | 10.396 | 5 | 2.2  |
| 16803629 | acetylglutamate kinase [Listeria monocytogenes EGD-e]                             | 0.0001    | 0 | 0 | 3.145  | 2 | 2.2  |
| 16803664 | hypothetical protein lmo1624 [Listeria monocytogenes EGD-e]                       | 0.01      | 0 | 0 | 1.495  | 1 | 6    |
| 16803666 | hypothetical protein lmo1626 [Listeria monocytogenes EGD-e]                       | 0.0001    | 0 | 0 | 3.415  | 2 | 6    |
| 16803692 | hypothetical protein lmo1652 [Listeria monocytogenes EGD-e]                       | 0.01      | 0 | 0 | 1.765  | 1 | 1.2  |
| 16803696 | hypothetical protein lmo1656 [Listeria monocytogenes EGD-e]                       | 0.01      | 0 | 0 | 2.02   | 1 | 5.2  |
| 16803709 | hypothetical protein lmo1669 [Listeria monocytogenes EGD-e]                       | 0.0001    | 0 | 0 | 5.924  | 2 | 5.2  |
| 16803731 | hypothetical protein lmo1691 [Listeria monocytogenes EGD-e]                       | 0.0001    | 0 | 0 | 3.598  | 2 | 2.3  |
| 16803733 | hypothetical protein lmo1693 [Listeria monocytogenes EGD-e]                       | 0.01      | 0 | 0 | 1.857  | 1 | 3.3  |
| 16803734 | hypothetical protein lmo1694 [Listeria monocytogenes EGD-e]                       | 0.0001    | 0 | 0 | 2.953  | 2 | 1.1  |
| 16803737 | hypothetical protein lmo1697 [Listeria monocytogenes EGD-e]                       | 0.01      | 0 | 0 | 1.251  | 1 | 5.2  |
| 16803744 | hypothetical protein lmo1704 [Listeria monocytogenes EGD-e]                       | 0.01      | 0 | 0 | 2.405  | 1 | 5.2  |
| 16803746 | hypothetical protein lmo1706 [Listeria monocytogenes EGD-e]                       | 0.000001  | 0 | 0 | 5.083  | 3 | 1.2  |
| 16803748 | hypothetical protein lmo1708 [Listeria monocytogenes EGD-e]                       | 0.01      | 0 | 0 | 1.886  | 1 | 4.2  |
| 16803752 | hypothetical protein lmo1712 [Listeria monocytogenes EGD-e]                       | 0.0001    | 0 | 0 | 2.885  | 2 | 1.2  |
| 16803756 | hypothetical protein lmo1716 [Listeria monocytogenes EGD-e]                       | 0.01      | 0 | 0 | 1.74   | 1 | 3.52 |
| 16803758 | hypothetical protein lmo1718 [Listeria monocytogenes EGD-e]                       | 0.01      | 0 | 0 | 2.405  | 1 | 5.2  |
| 16803762 | hypothetical protein lmo1722 [Listeria monocytogenes EGD-e]                       | 0.0001    | 0 | 0 | 3.153  | 2 | 3.6  |
| 16803764 | hypothetical protein lmo1724 [Listeria monocytogenes EGD-e]                       | 0.01      | 0 | 0 | 1.613  | 1 | 1.2  |
| 16803765 | hypothetical protein lmo1725 [Listeria monocytogenes EGD-e]                       | 0.01      | 0 | 0 | 1.251  | 1 | 3.52 |
| 16803773 | hypothetical protein lmo1733 [Listeria monocytogenes EGD-e]                       | 0.01      | 0 | 0 | 1.173  | 1 | 2.2  |
| 16803810 | phosphoribosylformylglycinamide synthase subunit I [Listeria monocytogenes EGD-e] | 0.01      | 0 | 0 | 1.599  | 1 | 2.3  |
| 16803820 | peptidase I [Listeria monocytogenes EGD-e]                                        | 0.01      | 0 | 0 | 1.95   | 1 | 2.2  |
| 16803822 | hypothetical protein lmo1782 [Listeria monocytogenes EGD-e]                       | 0.0001    | 0 | 0 | 4.048  | 2 | 3.2  |
| 16803823 | 50S ribosomal protein L20 [Listeria monocytogenes EGD-e]                          | 0.0000001 | 0 | 0 | 6.413  | 4 | 3.71 |
| 16803829 | hypothetical protein lmo1789 [Listeria monocytogenes EGD-e]                       | 0.0001    | 0 | 0 | 3.142  | 2 | 1.4  |
| 16803854 | hypothetical protein lmo1814 [Listeria monocytogenes EGD-e]                       | 0.01      | 0 | 0 | 1.619  | 1 | 5.2  |
| 16803879 | hypothetical protein lmo1839 [Listeria monocytogenes EGD-e]                       | 0.01      | 0 | 0 | 1.678  | 1 | 1.2  |
| 16803886 | multidrug efflux protein NreA [Listeria monocytogenes EGD-e]                      | 0.01      | 0 | 0 | 1.283  | 1 | 1.2  |
| 16803898 | hypothetical protein lmo1858 [Listeria monocytogenes EGD-e]                       | 0.01      | 0 | 0 | 1.921  | 1 | 5.2  |
| 16803902 | hypothetical protein lmo1862 [Listeria monocytogenes EGD-e]                       | 0.01      | 0 | 0 | 1.526  | 1 | 5.2  |
| 16803913 | hypothetical protein lmo1873 [Listeria monocytogenes EGD-e]                       | 0.01      | 0 | 0 | 1.923  | 1 | 2.5  |
| 16803919 | hypothetical protein lmo1880 [Listeria monocytogenes EGD-e]                       | 0.01      | 0 | 0 | 1.384  | 1 | 3.1  |
| 16803929 | hypothetical protein lmo1890 [Listeria monocytogenes EGD-e]                       | 0.01      | 0 | 0 | 1.591  | 1 | 5.2  |
| 16803934 | hypothetical protein lmo1895 [Listeria monocytogenes EGD-e]                       | 0.01      | 0 | 0 | 2.335  | 1 | 3.1  |
| 16803950 | hypothetical protein lmo1911 [Listeria monocytogenes EGD-e]                       | 0.01      | 0 | 0 | 1.4    | 1 | 5.2  |
| 16803954 | hypothetical protein lmo1915 [Listeria monocytogenes EGD-e]                       | 0.01      | 0 | 0 | 1.37   | 1 | 2.11 |
| 16803957 | hypothetical protein lmo1918 [Listeria monocytogenes EGD-e]                       | 0.01      | 0 | 0 | 1.274  | 1 | 5.2  |
| 16803971 | hypothetical protein lmo1932 [Listeria monocytogenes EGD-e]                       | 0.01      | 0 | 0 | 2.095  | 1 | 2.5  |
| 16803977 | hypothetical protein lmo1938 [Listeria monocytogenes EGD-e]                       | 0.01      | 0 | 0 | 2.014  | 1 | 3.71 |
| 16803981 | hypothetical protein lmo1942 [Listeria monocytogenes EGD-e]                       | 0.0001    | 0 | 0 | 4.709  | 2 | 4.5  |
| 16803985 | hypothetical protein lmo1946 [Listeria monocytogenes EGD-e]                       | 0.01      | 0 | 0 | 1.411  | 1 | 2.4  |
| 16803986 | hypothetical protein lmo1947 [Listeria monocytogenes EGD-e]                       | 0.01      | 0 | 0 | 1.691  | 1 | 1.3  |
| 16803994 | hypothetical protein lmo1955 [Listeria monocytogenes EGD-e]                       | 0.0001    | 0 | 0 | 4.165  | 2 | 3.2  |
| 16804000 | hypothetical protein lmo1961 [Listeria monocytogenes EGD-e]                       | 0.01      | 0 | 0 | 1.353  | 1 | 5.2  |
| 16804002 | hypothetical protein lmo1963 [Listeria monocytogenes EGD-e]                       | 0.0001    | 0 | 0 | 3.618  | 2 | 5.2  |
| 16804024 | hypothetical protein lmo1985 [Listeria monocytogenes EGD-e]                       | 0.0001    | 0 | 0 | 2.996  | 2 | 2.2  |
| 16804037 | hypothetical protein lmo1998 [Listeria monocytogenes EGD-e]                       | 0.01      | 0 | 0 | 2.207  | 1 | 2.11 |
| 16804043 | hypothetical protein lmo2005 [Listeria monocytogenes EGD-e]                       | 0.01      | 0 | 0 | 1.353  | 1 | 2.11 |
| 16804046 | hypothetical protein lmo2007 [Listeria monocytogenes EGD-e]                       | 0.01      | 0 | 0 | 1.734  | 1 | 1.2  |
| 16804060 | hypothetical protein lmo2021 [Listeria monocytogenes EGD-e]                       | 0.01      | 0 | 0 | 1.72   | 1 | 5.2  |
| 16804065 | putative peptidoglycan bound protein (LPXTG motif) [Listeria monocytogenes EGD-e] | 0.0001    | 0 | 0 | 4.009  | 2 | 1.8  |
| 16804067 | hypothetical protein lmo2028 [Listeria monocytogenes EGD-e]                       | 0.01      | 0 | 0 | 1.804  | 1 | 5.2  |
| 16804070 | hypothetical protein lmo2031 [Listeria monocytogenes EGD-e]                       | 0.0001    | 0 | 0 | 3.035  | 2 | 5.2  |
| 16804072 | hypothetical protein lmo2033 [Listeria monocytogenes EGD-e]                       | 0.01      | 0 | 0 | 1.877  | 1 | 1.7  |
| 16804074 | N-acetylglucosaminyl transferase [Listeria monocytogenes EGD-e]                   | 0.01      | 0 | 0 | 1.797  | 1 | 1.1  |
| 16804077 | hypothetical protein lmo2038 [Listeria monocytogenes EGD-e]                       | 0.01      | 0 | 0 | 1.569  | 1 | 1.1  |
| 16804092 | hypothetical protein lmo2053 [Listeria monocytogenes EGD-e]                       | 0.01      | 0 | 0 | 1.528  | 1 | 5.2  |
| 16804099 | hypothetical protein lmo2060 [Listeria monocytogenes EGD-e]                       | 0.0001    | 0 | 0 | 3.808  | 2 | 5.2  |
| 16804114 | hypothetical protein lmo2075 [Listeria monocytogenes EGD-e]                       | 0.01      | 0 | 0 | 1.768  | 1 | 7    |
| 16804119 | hypothetical protein lmo2080 [Listeria monocytogenes EGD-e]                       | 0.01      | 0 | 0 | 1.4    | 1 | 6    |
| 16804126 | hypothetical protein lmo2087 [Listeria monocytogenes EGD-e]                       | 0.01      | 0 | 0 | 2.158  | 1 | 5.2  |
| 16804128 | hypothetical protein lmo2089 [Listeria monocytogenes EGD-e]                       | 0.01      | 0 | 0 | 1.513  | 1 | 2.4  |
| 16804144 | hypothetical protein lmo2105 [Listeria monocytogenes EGD-e]                       | 0.000001  | 0 | 0 | 4.739  | 3 | 1.2  |
| 16804145 | hypothetical protein lmo2106 [Listeria monocytogenes EGD-e]                       | 0.01      | 0 | 0 | 1.859  | 1 | 5.2  |
| 16804148 | hypothetical protein lmo2109 [Listeria monocytogenes EGD-e]                       | 0.0001    | 0 | 0 | 3.996  | 2 | 2.11 |
| 16804157 | hypothetical protein lmo2118 [Listeria monocytogenes EGD-e]                       | 0.0001    | 0 | 0 | 3.147  | 2 | 7    |
| 16804161 | hypothetical protein lmo2122 [Listeria monocytogenes EGD-e]                       | 0.01      | 0 | 0 | 1.477  | 1 | 2.11 |
| 16804169 | hypothetical protein lmo2130 [Listeria monocytogenes EGD-e]                       | 0.01      | 0 | 0 | 1.89   | 1 | 5.2  |
| 16804178 | hypothetical protein lmo2139 [Listeria monocytogenes EGD-e]                       | 0.0001    | 0 | 0 | 2.977  | 2 | 1.2  |
| 16804179 | hypothetical protein lmo2140 [Listeria monocytogenes EGD-e]                       | 0.01      | 0 | 0 | 1.527  | 1 | 1.2  |
| 16804185 | hypothetical protein lmo2146 [Listeria monocytogenes EGD-e]                       | 0.01      | 0 | 0 | 1.881  | 1 | 3.52 |
| 16804186 | hypothetical protein lmo2147 [Listeria monocytogenes EGD-e]                       | 0.01      | 0 | 0 | 1.707  | 1 | 5.2  |
| 16804187 | hypothetical protein lmo2148 [Listeria monocytogenes EGD-e]                       | 0.01      | 0 | 0 | 1.425  | 1 | 5.2  |
| 16804193 | ribosecyclic-diphosphate reductase beta subunit [Listeria monocytogenes EGD-e]    | 0.01      | 0 | 0 | 1.327  | 1 | 2.3  |
| 16804196 | hypothetical protein lmo2157 [Listeria monocytogenes EGD-e]                       | 0.01      | 0 | 0 | 1.395  | 1 | 5.2  |
| 16804197 | hypothetical protein lmo2158 [Listeria monocytogenes EGD-e]                       | 0.01      | 0 | 0 | 1.819  | 1 | 5.2  |
| 16804205 | hypothetical protein lmo2166 [Listeria monocytogenes EGD-e]                       | 0.01      | 0 | 0 | 1.534  | 1 | 5.1  |
| 16804220 | hypothetical protein lmo2181 [Listeria monocytogenes EGD-e]                       | 0.01      | 0 | 0 | 1.638  | 1 | 5.2  |
| 16804222 | hypothetical protein lmo2183 [Listeria monocytogenes EGD-e]                       | 0.01      | 0 | 0 | 1.984  | 1 | 1.2  |
| 16804230 | transcriptional regulator Sps [Listeria monocytogenes EGD-e]                      | 0.01      | 0 | 0 | 1.338  | 1 | 3.52 |
| 16804231 | hypothetical protein lmo2192 [Listeria monocytogenes EGD-e]                       | 0.01      | 0 | 0 | 1.244  | 1 | 5.2  |
| 16804252 | hypothetical protein lmo2216 [Listeria monocytogenes EGD-e]                       | 0.0001    | 0 | 0 | 4.33   | 2 | 5.2  |
| 16804256 | hypothetical protein lmo2217 [Listeria monocytogenes EGD-e]                       | 0.01      | 0 | 0 | 1.559  | 1 | 5.2  |
| 16804269 | hypothetical protein lmo2230 [Listeria monocytogenes EGD-e]                       | 0.01      | 0 | 0 | 1.5    | 1 | 4.2  |
| 16804270 | hypothetical protein lmo2231 [Listeria monocytogenes EGD-e]                       | 0.01      | 0 | 0 | 1.15   | 1 | 5.2  |
| 16804272 | hypothetical protein lmo2233 [Listeria monocytogenes EGD-e]                       | 0.000001  | 0 | 0 | 4.616  | 3 | 3.52 |
| 16804276 | hypothetical protein lmo2237 [Listeria monocytogenes EGD-e]                       | 0.01      | 0 | 0 | 1.547  | 1 | 1.2  |
| 16804299 | hypothetical protein lmo2260 [Listeria monocytogenes EGD-e]                       | 0.01      | 0 | 0 | 1.485  | 1 | 5.2  |
| 16804302 | hypothetical protein lmo2263 [Listeria monocytogenes EGD-e]                       | 0.01      | 0 | 0 | 2.53   | 1 | 5.2  |
| 16804303 | hypothetical protein lmo2264 [Listeria monocytogenes EGD-e]                       | 0.0001    | 0 | 0 | 3.921  | 2 | 5.2  |
| 16804309 | hypothetical protein lmo2270 [Listeria monocytogenes EGD-e]                       | 0.01      | 0 | 0 | 2.573  | 1 | 3.52 |
| 16804372 | hypothetical protein lmo2334 [Listeria monocytogenes EGD-e]                       | 0.0001    | 0 | 0 | 3.263  | 2 | 3.52 |
| 16804374 | fructose-1-phosphate kinase [Listeria monocytogenes EGD-e]                        | 0.000001  | 0 | 0 | 5.334  | 3 | 2.11 |
| 16804376 | aminopeptidase C [Listeria monocytogenes EGD-e]                                   | 0.0001    | 0 | 0 | 3.602  | 2 | 2.2  |
| 16804394 | hypothetical protein lmo2356 [Listeria monocytogenes EGD-e]                       | 0.01      | 0 | 0 | 1.354  | 1 | 6    |
| 16804400 | hypothetical protein lmo2362 [Listeria monocytogenes EGD-e]                       | 0.0001    | 0 | 0 | 3.115  | 2 | 1.2  |
| 16804445 | hypothetical protein lmo2407 [Listeria monocytogenes EGD-e]                       | 0.01      | 0 | 0 | 1.875  | 1 | 6    |
| 16804454 | hypothetical protein lmo2416 [Listeria monocytogenes EGD-e]                       | 0.000001  | 0 | 0 | 6.182  | 3 | 5.1  |
| 16804458 | hypothetical protein lmo2420 [Listeria monocytogenes EGD-e]                       | 0.0001    | 0 | 0 | 3.772  | 2 | 6    |
| 16804463 | hypothetical protein lmo2425 [Listeria monocytogenes EGD-e]                       | 0.01      | 0 | 0 | 4.24   | 1 | 2.2  |
| 16804468 | hypothetical protein lmo2430 [Listeria monocytogenes EGD-e]                       | 0.0001    | 0 | 0 | 3.862  | 2 | 1.2  |
| 16804471 | hypothetical protein lmo2433 [Listeria monocytogenes EGD-e]                       | 0.01      | 0 | 0 | 1.62   | 1 | 2.4  |
| 16804499 | DNA-directed RNA polymerase subunit N [Listeria monocytogenes EGD-e]              | 0.01      | 0 | 0 | 1.581  | 1 | 3.53 |
| 16804503 | hypothetical protein lmo2465 [Listeria monocytogenes EGD-e]                       | 0.0001    | 0 | 0 | 3.087  | 2 | 6    |
| 16804505 | hypothetical protein lmo2467 [Listeria monocytogenes EGD-e]                       | 0.0001    | 0 | 0 | 3.61   | 2 | 2.11 |
| 16804533 | hypothetical protein lmo2495 [Listeria monocytogenes EGD-e]                       | 0.01      | 0 | 0 | 1.344  | 1 | 5.2  |
| 16804538 | roo-component sensor histidine kinase [Listeria monocytogenes EGD-e]              | 0.0001    | 0 | 0 | 3.634  | 2 | 1.3  |
| 16804541 | hypothetical protein lmo2503 [Listeria monocytogenes EGD-e]                       | 0.0001    | 0 | 0 | 3.878  | 2 | 2.4  |
| 16804544 | hypothetical protein lmo2506 [Listeria monocytogenes EGD-e]                       | 0.01      | 0 | 0 | 1.704  | 1 | 1.7  |
| 16804546 | hypothetical protein lmo2508 [Listeria monocytogenes EGD-e]                       | 0.01      | 0 | 0 | 1.265  | 1 | 5.2  |
| 16804561 | hypothetical protein lmo2523 [Listeria monocytogenes EGD-e]                       | 0.0001    | 0 | 0 | 3.836  | 2 | 3.1  |
| 16804568 | hypothetical protein lmo2530 [Listeria monocytogenes EGD-e]                       | 0.0001    | 0 | 0 | 5.235  | 2 | 1.4  |
| 16804572 | ATP synthase subunit C [Listeria monocytogenes EGD-e]                             | 0.01      | 0 | 0 | 3.081  | 1 | 1.4  |
| 16804578 | hypothetical protein lmo2540 [Listeria monocytogenes EGD-e]                       | 0.0001    | 0 | 0 | 5.541  | 2 | 2.6  |
| 16804580 | hypothetical protein lmo2542 [Listeria monocytogenes EGD-e]                       | 0.01      | 0 | 0 | 1.382  | 1 | 2.5  |
| 16804589 | transcription termination factor Rho [Listeria monocytogenes EGD-e]               | 0.01      | 0 | 0 | 1.227  | 1 | 3.54 |
| 16804590 | UDP-N-acetylglucosamine 1-carboxyvinyltransferase [Listeria monocytogenes EGD-e]  | 0.01      | 0 | 0 | 1.778  | 1 | 1.1  |
| 16804598 | hypothetical protein lmo2560 [Listeria monocytogenes EGD-e]                       | 0.01      | 0 | 0 |        |   |      |

|          |                                                                                                     |            |            |        |       |        |      |      |
|----------|-----------------------------------------------------------------------------------------------------|------------|------------|--------|-------|--------|------|------|
| 16804684 | hypothetical protein lmo2647 [Listeria monocytogenes EGD-e]                                         | 0.01       | 0          | 0      | 2.007 | 1      | 2.2  |      |
| 16804687 | hypothetical protein lmo2650 [Listeria monocytogenes EGD-e]                                         | 0.01       | 0          | 0      | 1.699 | 1      | 1.2  |      |
| 16804691 | elongation factor EF-2 [Listeria monocytogenes EGD-e]                                               | 0.01       | 0          | 0      | 1.752 | 1      | 3.74 |      |
| 16804692 | 30S ribosomal protein S7 [Listeria monocytogenes EGD-e]                                             | 0.01       | 0          | 0      | 1.438 | 1      | 3.71 |      |
| 16804695 | hypothetical protein lmo2658 [Listeria monocytogenes EGD-e]                                         | 0.01       | 0          | 0      | 1.658 | 1      | 2.2  |      |
| 16804702 | hypothetical protein lmo2665 [Listeria monocytogenes EGD-e]                                         | 0.00001    | 0          | 0      | 3.358 | 2      | 1.2  |      |
| 16804704 | hypothetical protein lmo2667 [Listeria monocytogenes EGD-e]                                         | 0.00001    | 0.01       | 0      | 1.669 | 1      | 1.2  |      |
| 16804707 | hypothetical protein lmo2670 [Listeria monocytogenes EGD-e]                                         | 0.00001    | 0          | 0      | 3.63  | 2      | 5.2  |      |
| 16804711 | ribose-5-phosphate isomerase B [Listeria monocytogenes EGD-e]                                       | 0.000001   | 0          | 0      | 5.929 | 3      | 2.11 |      |
| 16804715 | hypothetical protein lmo2678 [Listeria monocytogenes EGD-e]                                         | 0.01       | 0          | 0      | 1.377 | 1      | 3.52 |      |
| 16804725 | hypothetical protein lmo2688 [Listeria monocytogenes EGD-e]                                         | 0.00001    | 0          | 0      | 4.407 | 2      | 5.2  |      |
| 16804737 | hypothetical protein lmo2700 [Listeria monocytogenes EGD-e]                                         | 0.01       | 0.01       | 0      | 2.356 | 1      | 2.11 |      |
| 16804747 | hypothetical protein lmo2710 [Listeria monocytogenes EGD-e]                                         | 0.01       | 0          | 0      | 1.866 | 1      | 6    |      |
| 16804759 | hypothetical protein lmo2722 [Listeria monocytogenes EGD-e]                                         | 0.01       | 0          | 0      | 1.565 | 1      | 3.52 |      |
| 16804762 | hypothetical protein lmo2725 [Listeria monocytogenes EGD-e]                                         | 0.00001    | 0          | 0      | 3.498 | 2      | 5.2  |      |
| 16804763 | hypothetical protein lmo2726 [Listeria monocytogenes EGD-e]                                         | 0.000001   | 0          | 0      | 5.088 | 3      | 3.52 |      |
| 16804768 | hypothetical protein lmo2731 [Listeria monocytogenes EGD-e]                                         | 0.01       | 0          | 0      | 1.75  | 1      | 3.52 |      |
| 16804776 | NAD-dependent deacetylase [Listeria monocytogenes EGD-e]                                            | 0.01       | 0          | 0      | 1.543 | 1      | 2.1  |      |
| 16804778 | hypothetical protein lmo2741 [Listeria monocytogenes EGD-e]                                         | 0.01       | 0          | 0      | 2.081 | 1      | 1.2  |      |
| 16804782 | hypothetical protein lmo2745 [Listeria monocytogenes EGD-e]                                         | 0.01       | 0.01       | 0      | 1.408 | 1      | 1.2  |      |
| 16804783 | hypothetical protein lmo2746 [Listeria monocytogenes EGD-e]                                         | 0.01       | 0          | 0      | 1.238 | 1      | 6    |      |
| 16804789 | hypothetical protein lmo2752 [Listeria monocytogenes EGD-e]                                         | 0.01       | 0          | 0      | 1.545 | 1      | 1.2  |      |
| 16804798 | hypothetical protein lmo2761 [Listeria monocytogenes EGD-e]                                         | 0.00001    | 0.01       | 0      | 2.021 | 1      | 2.11 |      |
| 16804804 | hypothetical protein lmo2767 [Listeria monocytogenes EGD-e]                                         | 0.00001    | 0          | 0      | 3.678 | 2      | 5.2  |      |
| 16804805 | hypothetical protein lmo2768 [Listeria monocytogenes EGD-e]                                         | 0.01       | 0          | 0      | 1.632 | 1      | 6    |      |
| 16804817 | hypothetical protein lmo2780 [Listeria monocytogenes EGD-e]                                         | 0.01       | 0          | 0      | 2.234 | 1      | 1.2  |      |
| 16804831 | hypothetical protein lmo2794 [Listeria monocytogenes EGD-e]                                         | 0.000001   | 0          | 0      | 5.703 | 3      | 3.4  |      |
| 16804834 | hypothetical protein lmo2799 [Listeria monocytogenes EGD-e]                                         | 0.000001   | 0          | 0      | 5.516 | 1      | 5.2  |      |
| 16804853 | hypothetical protein lmo2816 [Listeria monocytogenes EGD-e]                                         | 0.00001    | 0          | 0      | 2.993 | 2      | 1.2  |      |
| 16804855 | hypothetical protein lmo2818 [Listeria monocytogenes EGD-e]                                         | 0.01       | 0          | 0      | 1.56  | 1      | 1.2  |      |
| 16804868 | hypothetical protein lmo2831 [Listeria monocytogenes EGD-e]                                         | 0.01       | 0          | 0      | 1.903 | 1      | 2.11 |      |
| 16804869 | hypothetical protein lmo2832 [Listeria monocytogenes EGD-e]                                         | 0.01       | 0.01       | 0      | 2.163 | 1      | 5.2  |      |
| 16804870 | hypothetical protein lmo2833 [Listeria monocytogenes EGD-e]                                         | 0.01       | 0          | 0      | 1.602 | 1      | 2.11 |      |
| 16804876 | hypothetical protein lmo2839 [Listeria monocytogenes EGD-e]                                         | 0.00001    | 0          | 0      | 3.311 | 2      | 1.2  |      |
| 16804881 | hypothetical protein lmo2844 [Listeria monocytogenes EGD-e]                                         | 0.00001    | 0          | 0      | 3.312 | 2      | 5.2  |      |
| 16804891 | hypothetical protein lmo2854 [Listeria monocytogenes EGD-e]                                         | 0.01       | 0          | 0      | 1.456 | 1      | 7    |      |
| 16804894 | hypothetical protein lmo2857 [Listeria monocytogenes EGD-e]                                         | 0.01       | 0          | 0      | 1.242 | 1      | 7    |      |
| 4606225  | chromosomal replication initiation protein [Listeria monocytogenes str. 4b F2365]                   | 0.01       | 1.894      | 1      | 0     | 0      | 3.1  |      |
| 4606226  | DNA polymerase III subunit beta [Listeria monocytogenes str. 4b F2365]                              | 0.000001   | 0.0001     | 5.228  | 3     | 3.998  | 2    | 3.1  |
| 4606227  | MATE efflux family protein [Listeria monocytogenes str. 4b F2365]                                   | 0.01       | 0          | 1.423  | 1     | 0      | 5.2  |      |
| 4606230  | DNA gyrase B subunit [Listeria monocytogenes str. 4b F2365]                                         | 1E-12      | 1E-20      | 13.673 | 10    | 20.673 | 3    | 3.4  |
| 4606232  | cardiolipin synthetase [Listeria monocytogenes str. 4b F2365]                                       | 0.00001    | 0.000001   | 3.614  | 2     | 4.657  | 3    | 2.1  |
| 4606233  | serpinidase N1-acetyltransferase [Listeria monocytogenes str. 4b F2365]                             | 0.01       | 0.0001     | 1.855  | 1     | 3.8    | 2    | 2.2  |
| 4606235  | neovalonate kinase [Listeria monocytogenes str. 4b F2365]                                           | 0.000001   | 1E-10      | 5.382  | 3     | 7.76   | 5    | 7    |
| 4606237  | phosphomethylase kinase [Listeria monocytogenes str. 4b F2365]                                      | 0.01       | 0.01       | 1.536  | 1     | 0      | 4    | 7    |
| 4606239  | quinol oxidase AA3, subunit II [Listeria monocytogenes str. 4b F2365]                               | 0.01       | 0.01       | 2.159  | 1     | 2.148  | 1    | 1.4  |
| 4606245  | hypothetical protein LMO2365_0022 [Listeria monocytogenes str. 4b F2365]                            | 0.000001   | 0.0001     | 5.877  | 3     | 3.931  | 2    | 5.2  |
| 4606246  | transcriptional regulator, GntR family [Listeria monocytogenes str. 4b F2365]                       | 0.00000001 | 0.0001     | 8.743  | 4     | 4.219  | 2    | 3.52 |
| 4606248  | PTS system, mannose/fructose/sorbitose family, IIB component [Listeria monocytogenes str. 4b F2365] | 0.00001    | 0.0001     | 1.631  | 1     | 2.201  | 2    | 5.2  |
| 4606249  | PTS system, mannose-specific, IIC component, putative [Listeria monocytogenes str. 4b F2365]        | 0.00001    | 0.01       | 3.914  | 2     | 2.07   | 1    | 1.2  |
| 4606250  | PTS system, mannose/fructose/sorbitose family, IID component [Listeria monocytogenes str. 4b F2365] | 0.00001    | 0.0001     | 4.17   | 2     | 0      | 0    | 1.2  |
| 4606253  | PTS system, beta-glucoside-specific, IIABC component [Listeria monocytogenes str. 4b F2365]         | 0.00001    | 0.00000001 | 3.54   | 2     | 8.119  | 4    | 1.2  |
| 4606261  | hydrolase, halo-dehalogenase-like family [Listeria monocytogenes str. 4b F2365]                     | 0.000001   | 0.0001     | 1.663  | 1     | 0      | 5.2  | 5.2  |
| 4606262  | transcriptional regulator, LsdA family [Listeria monocytogenes str. 4b F2365]                       | 0.01       | 0.0001     | 1.743  | 1     | 3.881  | 2    | 3.52 |
| 4606266  | SIS domain protein [Listeria monocytogenes str. 4b F2365]                                           | 0.01       | 0.01       | 2.266  | 1     | 2.267  | 1    | 2.11 |
| 4606267  | ornithine carbamoyltransferase [Listeria monocytogenes str. 4b F2365]                               | 0.000001   | 0.01       | 5.074  | 3     | 0      | 0    | 2.2  |
| 4606271  | hypothetical protein LMO2365_0049 [Listeria monocytogenes str. 4b F2365]                            | 0.000001   | 0.01       | 1.753  | 1     | 0      | 0    | 2.2  |
| 4606274  | arginine diaminase [Listeria monocytogenes str. 4b F2365]                                           | 1E-12      | 0.000001   | 9.192  | 6     | 5.569  | 3    | 7    |
| 4606276  | single-strand binding protein [Listeria monocytogenes str. 4b F2365]                                | 0.01       | 0          | 1.487  | 1     | 0      | 0    | 3.1  |
| 4606277  | ribosomal protein S18 [Listeria monocytogenes str. 4b F2365]                                        | 0.01       | 0          | 1.835  | 1     | 0      | 0    | 3.71 |
| 4606278  | hypothetical protein, putative [Listeria monocytogenes str. 4b F2365]                               | 0.00001    | 0.0001     | 2.861  | 2     | 2.989  | 2    | 1.8  |
| 4606280  | accessory gene regulator protein D, putative [Listeria monocytogenes str. 4b F2365]                 | 0.00001    | 0.01       | 1.594  | 1     | 1.479  | 1    | 1.2  |
| 4606281  | accessory gene regulator protein C [Listeria monocytogenes str. 4b F2365]                           | 0.00000001 | 1E-10      | 5.955  | 4     | 9.272  | 5    | 1.3  |
| 4606284  | 50S ribosomal protein L9 [Listeria monocytogenes str. 4b F2365]                                     | 1E-34      | 1E-32      | 57.987 | 17    | 58.179 | 16   | 3.71 |
| 4606287  | adenylosuccinate synthetase [Listeria monocytogenes str. 4b F2365]                                  | 0.00000001 | 0.000001   | 7.584  | 4     | 5.754  | 3    | 2.3  |
| 4606290  | hypothetical protein LMO2365_0068 [Listeria monocytogenes str. 4b F2365]                            | 1E-10      | 0.00000001 | 10.459 | 5     | 7.591  | 4    | 5.2  |
| 4606291  | hypothetical protein LMO2365_0069 [Listeria monocytogenes str. 4b F2365]                            | 0.01       | 0.01       | 1.77   | 1     | 2.192  | 1    | 6    |
| 4606295  | hypothetical protein LMO2365_0073 [Listeria monocytogenes str. 4b F2365]                            | 0.01       | 0.01       | 1.455  | 1     | 0      | 0    | 6    |
| 4606296  | hypothetical protein LMO2365_0074 [Listeria monocytogenes str. 4b F2365]                            | 0.01       | 0.000001   | 1.99   | 1     | 5.285  | 3    | 3    |
| 4606299  | hypothetical protein LMO2365_0077 [Listeria monocytogenes str. 4b F2365]                            | 1E-12      | 1E-10      | 10.736 | 1     | 9.401  | 5    | 4.5  |
| 4606312  | hypothetical protein LMO2365_0090 [Listeria monocytogenes str. 4b F2365]                            | 0.01       | 0          | 2.227  | 1     | 0      | 0    | 0    |
| 4606315  | ADA regulatory protein [Listeria monocytogenes str. 4b F2365]                                       | 0.00000001 | 1E-14      | 8.847  | 4     | 15.109 | 7    | 3.52 |
| 4606316  | pentapeptide repeat domain protein [Listeria monocytogenes str. 4b F2365]                           | 0.01       | 0.01       | 2.046  | 1     | 2.056  | 1    | 5.2  |
| 4606318  | hypothetical protein LMO2365_0096 [Listeria monocytogenes str. 4b F2365]                            | 0.000001   | 0.0001     | 1.467  | 1     | 4.067  | 2    | 5.2  |
| 4606323  | oxalodihydroxy, aldo/keto reductase family [Listeria monocytogenes str. 4b F2365]                   | 0.01       | 0          | 1.675  | 1     | 0      | 0    | 2.11 |
| 4606325  | hypothetical protein LMO2365_0103 [Listeria monocytogenes str. 4b F2365]                            | 0.000001   | 0.01       | 5.01   | 3     | 1.644  | 1    | 5.1  |
| 4606326  | hypothetical protein LMO2365_0104 [Listeria monocytogenes str. 4b F2365]                            | 0.00000001 | 0.00000001 | 7.448  | 4     | 6.927  | 4    | 5.1  |
| 4606329  | ATP synthase subunit A [Listeria monocytogenes str. 4b F2365]                                       | 0.00000001 | 0.00000001 | 3.224  | 2     | 3.224  | 2    | 5.14 |
| 4606330  | ATP synthase F1, gamma subunit, putative [Listeria monocytogenes str. 4b F2365]                     | 1E-10      | 1E-18      | 8.355  | 5     | 14.243 | 9    | 1.4  |
| 4606331  | ATP synthase subunit B [Listeria monocytogenes str. 4b F2365]                                       | 0.01       | 0          | 1.538  | 1     | 0      | 0    | 1.4  |
| 4606334  | hypothetical protein LMO2365_0112 [Listeria monocytogenes str. 4b F2365]                            | 0.000001   | 0.01       | 4.831  | 3     | 1.206  | 1    | 5.1  |
| 4606335  | PTS system, mannose-specific, IIAB component [Listeria monocytogenes str. 4b F2365]                 | 0.000001   | 1E-36      | 42.568 | 15    | 58.957 | 18   | 7    |
| 4606345  | chitinase B [Listeria monocytogenes str. 4b F2365]                                                  | 0.00001    | 0.000001   | 3.795  | 2     | 5.228  | 3    | 2.11 |
| 4606348  | ABC transporter, ATP-binding/permease protein [Listeria monocytogenes str. 4b F2365]                | 0.000001   | 0.00001    | 5.4    | 2     | 3.876  | 2    | 1.2  |
| 4606350  | lipase [Listeria monocytogenes str. 4b F2365]                                                       | 0.01       | 0.01       | 1.863  | 1     | 1.684  | 1    | 2.4  |
| 4606353  | hypothetical protein LMO2365_0131 [Listeria monocytogenes str. 4b F2365]                            | 0.01       | 0          | 1.847  | 1     | 0      | 0    | 4.3  |
| 4606354  | repressor protein, putative [Listeria monocytogenes str. 4b F2365]                                  | 0.00000001 | 0.00000001 | 7.962  | 1     | 7.962  | 1    | 4.7  |
| 4606355  | antigen D [Listeria monocytogenes str. 4b F2365]                                                    | 0.01       | 0.00001    | 1.6    | 1     | 2.7    | 2    | 0.5  |
| 4606356  | antigen C [Listeria monocytogenes str. 4b F2365]                                                    | 0.000001   | 0.01       | 5.57   | 3     | 2.139  | 1    | 4.5  |
| 4606361  | hypothetical protein LMO2365_0139 [Listeria monocytogenes str. 4b F2365]                            | 0.01       | 0.01       | 1.574  | 1     | 1.375  | 1    | 4.3  |
| 4606362  | hypothetical protein LMO2365_0140 [Listeria monocytogenes str. 4b F2365]                            | 0.00001    | 0.01       | 1.748  | 1     | 0      | 0    | 4.3  |
| 4606363  | minor structural protein, putative [Listeria monocytogenes str. 4b F2365]                           | 0.01       | 0.01       | 2.053  | 1     | 2.055  | 1    | 4.3  |
| 4606374  | acetyltransferase, GNAT family [Listeria monocytogenes str. 4b F2365]                               | 0.00001    | 0.0001     | 7.216  | 2     | 0      | 0    | 5.2  |
| 4606377  | oligopeptide ABC transporter, permease protein [Listeria monocytogenes str. 4b F2365]               | 0.01       | 0          | 1.895  | 1     | 0      | 0    | 1.2  |
| 4606381  | hypothetical protein LMO2365_0160 [Listeria monocytogenes str. 4b F2365]                            | 0.000001   | 0.000001   | 1.667  | 1     | 5.612  | 3    | 5.2  |
| 4606388  | bacterial extracellular solute-binding protein, family 5 [Listeria monocytogenes str. 4b F2365]     | 1E-12      | 0.00000001 | 12.773 | 6     | 7.116  | 4    | 6    |
| 4606393  | hypothetical protein LMO2365_0172 [Listeria monocytogenes str. 4b F2365]                            | 1E-16      | 1E-12      | 13.467 | 8     | 12.119 | 6    | 3.2  |
| 4606398  | DNA polymerase III subunit delta [Listeria monocytogenes str. 4b F2365]                             | 0.00000001 | 1E-14      | 7.139  | 4     | 13.088 | 7    | 3.1  |
| 4606399  | hypothetical protein LMO2365_0178 [Listeria monocytogenes str. 4b F2365]                            | 0.01       | 0.01       | 1.55   | 1     | 0      | 0    | 5.2  |
| 4606400  | hypothetical protein LMO2365_0179 [Listeria monocytogenes str. 4b F2365]                            | 1E-18      | 1E-18      | 25.924 | 9     | 23.815 | 9    | 5.2  |
| 4606401  | hypothetical protein LMO2365_0180 [Listeria monocytogenes str. 4b F2365]                            | 0.00001    | 0.01       | 4.58   | 2     | 2.057  | 1    | 5.2  |
| 4606403  | tetraproline methylase family protein [Listeria monocytogenes str. 4b F2365]                        | 1E-14      | 0.00000001 | 12.407 | 7     | 6.265  | 4    | 5.2  |
| 4606406  | hypothetical protein LMO2365_0185 [Listeria monocytogenes str. 4b F2365]                            | 0.00000001 | 0.00000001 | 9.317  | 4     | 8.418  | 4    | 5.2  |
| 4606413  | sugar ABC transporter, sugar-binding protein [Listeria monocytogenes str. 4b F2365]                 | 0.01       | 0.01       | 1.419  | 1     | 0      | 0    | 2.11 |
| 4606414  | glycosyl hydrolase, family 31 [Listeria monocytogenes str. 4b F2365]                                | 0.01       | 0.01       | 2.088  | 1     | 1.727  | 1    | 2.11 |
| 4606416  | oligo-1,6-glucosidase [Listeria monocytogenes str. 4b F2365]                                        | 0.01       | 0.01       | 1.688  | 1     | 1.291  | 1    | 2.11 |
| 4606419  | primase-related protein [Listeria monocytogenes str. 4b F2365]                                      | 0.01       | 0.01       | 1.928  | 1     | 0      | 0    | 5.2  |
| 4606422  | 4-diphosphocytidyl-2-C-methyl-D-erythritol kinase [Listeria monocytogenes str. 4b F2365]            | 0.01       | 0          | 1.694  | 1     | 0      | 0    | 1.1  |
| 4606423  | hypothetical protein LMO2365_0202 [Listeria monocytogenes str. 4b F2365]                            | 0.01       | 0          | 2.542  | 1     | 0      | 0    | 2.11 |
| 4606425  | hypothetical protein LMO2365_0204 [Listeria monocytogenes str. 4b F2365]                            | 0.00001    | 1E-10      | 4.025  | 2     | 10.06  | 5    | 5.2  |
| 4606427  | ABC transporter, permease protein [Listeria monocytogenes str. 4b F2365]                            | 0.000001   | 0.0001     | 1.389  | 1     | 3.314  | 2    | 1.2  |
| 4606428  | stage V sporulation protein G [Listeria monocytogenes str. 4b F2365]                                | 1E-26      | 1E-40      | 34.126 | 13    | 57.312 | 20   | 5.2  |
| 4606431  | ribose-phosphate pyrophosphokinase [Listeria monocytogenes str. 4b F2365]                           | 0.01       | 0.01       | 1.936  | 1     | 1.739  | 1    | 3.72 |
| 4606433  | 1-phosphatidylinositol phosphodiesterase [Listeria monocytogenes str. 4b F2365]                     | 0.000001   | 0.00001    | 4.435  | 3     | 0      | 0    | 2.4  |
| 4606434  | listeriolysin O [Listeria monocytogenes str. 4b F2365]                                              | 0.01       | 0.0001     | 2.655  | 1     | 3.259  | 2    | 4.8  |
| 4606436  | actin-assembly inducing protein [Listeria monocytogenes str. 4b F2365]                              | 0.00000001 | 0.00001    | 8.362  | 4     | 3.981  | 2    | 1.8  |
| 4606437  | phospholipase C [Listeria monocytogenes str. 4b F2365]                                              | 0.01       | 0.00001    | 1.414  | 1     | 3.337  | 2    | 2.4  |
| 4606440  | hypothetical protein LMO2365_0219 [Listeria monocytogenes str. 4b F2365]                            | 0.00001    | 0.01       | 2.833  | 2     | 1.819  | 1    | 5.2  |
| 4606442  | L-lactate dehydrogenase [Listeria monocytogenes str. 4b F2365]                                      | 0.00001    | 0.01       | 3.129  | 2     | 1.728  | 1    | 2.11 |
| 4606444  | acetyltransferase, GNAT family [Listeria monocytogenes str. 4b F2365]                               | 0.00001    | 0.01       | 3.695  | 2     | 1.837  | 1    | 2.2  |

|         |                                                                                                   |           |           |           |    |        |    |      |
|---------|---------------------------------------------------------------------------------------------------|-----------|-----------|-----------|----|--------|----|------|
| 4606528 | DNA-binding response regulator [Listeria monocytogenes str. 4b F2365]                             | 0.000001  | 0.000001  | 5.707     | 3  | 4.845  | 3  | 3.52 |
| 4606531 | hypothetical protein LMO2365_0310 [Listeria monocytogenes str. 4b F2365]                          | 1         | 0.01      | 1.615     | 1  | 0      | 0  | 5.2  |
| 4606532 | metal-beta-lactamase family protein [Listeria monocytogenes str. 4b F2365]                        | 0.0001    | 0.01      | 1.71      | 1  | 1.805  | 1  | 5.2  |
| 4606535 | hypothetical protein LMO2365_0314 [Listeria monocytogenes str. 4b F2365]                          | 1         | 0.01      | 1.822     | 1  | 1.672  | 1  | 5.2  |
| 4606536 | transcriptional regulator, LysR family [Listeria monocytogenes str. 4b F2365]                     | 0.0001    | 0.01      | 3.333     | 2  | 1.425  | 1  | 3.52 |
| 4606539 | PRD/PTS system IIA2 domain protein [Listeria monocytogenes str. 4b F2365]                         | 0.0001    | 0.0000001 | 4.215     | 2  | 7.874  | 4  | 3.52 |
| 4606540 | PTS system, IIC component [Listeria monocytogenes str. 4b F2365]                                  | 0.000001  | 0.0000001 | 4.894     | 2  | 7.894  | 3  | 5.2  |
| 4606541 | PTS system, cellobiose-specific, IIB component [Listeria monocytogenes str. 4b F2365]             | 1E-18     | 1E-30     | 16.573    | 9  | 25.17  | 15 | 1.2  |
| 4606549 | lipoprotein, putative [Listeria monocytogenes str. 4b F2365]                                      | 0.0001    | 0.0000001 | 2.894     | 2  | 6.842  | 4  | 6    |
| 4606558 | cell wall surface anchor family protein [Listeria monocytogenes str. 4b F2365]                    | 1         | 0.01      | 1.802     | 1  | 0      | 0  | 1.8  |
| 4606562 | lipoprotein, putative [Listeria monocytogenes str. 4b F2365]                                      | 0.0001    | 0.01      | 3.368     | 2  | 0      | 0  | 5.2  |
| 4606564 | transcriptional activator, putative [Listeria monocytogenes str. 4b F2365]                        | 0.0001    | 0.01      | 1.894     | 2  | 1.894  | 1  | 3.52 |
| 4606580 | hypothetical protein LMO2365_0360 [Listeria monocytogenes str. 4b F2365]                          | 0.0001    | 0.0001    | 3.973     | 2  | 0      | 0  | 6    |
| 4606582 | transketolase [Listeria monocytogenes str. 4b F2365]                                              | 1         | 0.01      | 1.704     | 1  | 1.542  | 1  | 2.12 |
| 4606584 | short chain dehydrogenase [Listeria monocytogenes str. 4b F2365]                                  | 0.0000001 | 0.000001  | 8.392     | 4  | 5.454  | 3  | 2.11 |
| 4606585 | ribose 5-phosphate isomerase B [Listeria monocytogenes str. 4b F2365]                             | 0.0001    | 0.000001  | 4.155     | 1  | 4.844  | 3  | 2.11 |
| 4606595 | long-chain acyl-CoA synthetase, putative [Listeria monocytogenes str. 4b F2365]                   | 1         | 0.01      | 0.0001    | 1  | 3.752  | 2  | 2.1  |
| 4606597 | oxidoreductase, YihX family [Listeria monocytogenes str. 4b F2365]                                | 1         | 0.01      | 1.58      | 1  | 0      | 0  | 2.14 |
| 4606598 | hypothetical protein LMO2365_0379 [Listeria monocytogenes str. 4b F2365]                          | 1E-14     | 0.000001  | 14.091    | 7  | 5.787  | 3  | 2.12 |
| 4606600 | hypothetical protein LMO2365_0381 [Listeria monocytogenes str. 4b F2365]                          | 0.0001    | 0.0001    | 1.75      | 1  | 0      | 0  | 2.11 |
| 4606603 | MutT/nudix family protein [Listeria monocytogenes str. 4b F2365]                                  | 0.0001    | 0.01      | 2.806     | 2  | 1.734  | 1  | 3.2  |
| 4606604 | hypothetical protein LMO2365_0385 [Listeria monocytogenes str. 4b F2365]                          | 1         | 0.01      | 2.351     | 1  | 1.494  | 1  | 5.2  |
| 4606606 | transcriptional regulator, GntR family [Listeria monocytogenes str. 4b F2365]                     | 1E-30     | 1E-24     | 30.744    | 15 | 23.434 | 12 | 3.52 |
| 4606607 | glycyl hydrolase, family 1 [Listeria monocytogenes str. 4b F2365]                                 | 0.0001    | 0.0001    | 3.758     | 2  | 0      | 0  | 2.11 |
| 4606608 | PTS system, beta-glucoside-specific, IIC component [Listeria monocytogenes str. 4b F2365]         | 1         | 0.01      | 1.498     | 1  | 0      | 0  | 1.2  |
| 4606612 | hypothetical protein LMO2365_0393 [Listeria monocytogenes str. 4b F2365]                          | 0.0001    | 0.0001    | 4.326     | 2  | 4.247  | 2  | 6    |
| 4606614 | methylmalonate-semialdehyde dehydrogenase [Listeria monocytogenes str. 4b F2365]                  | 1         | 0.01      | 1.618     | 1  | 1.939  | 1  | 2.11 |
| 4606622 | hypothetical protein LMO2365_0403 [Listeria monocytogenes str. 4b F2365]                          | 0.0000001 | 1E-10     | 15.349    | 6  | 19.049 | 0  | 5.2  |
| 4606627 | pyruvate-5-carboxylate reductase [Listeria monocytogenes str. 4b F2365]                           | 0.01      | 0.0001    | 2.427     | 1  | 3.594  | 2  | 2.22 |
| 4606643 | phosphate transporter family protein [Listeria monocytogenes str. 4b F2365]                       | 0.0001    | 0.0001    | 3.506     | 2  | 0      | 0  | 2.12 |
| 4606645 | hypothetical protein LMO2365_0427 [Listeria monocytogenes str. 4b F2365]                          | 1         | 0.01      | 1.852     | 1  | 1.273  | 1  | 5.2  |
| 4606648 | phosphoenolpyruvate synthase [Listeria monocytogenes str. 4b F2365]                               | 0.0001    | 0.0001    | 3.32      | 1  | 3.172  | 1  | 2.12 |
| 4606649 | hypothetical protein LMO2365_0431 [Listeria monocytogenes str. 4b F2365]                          | 0.0001    | 0.000001  | 3.473     | 2  | 5.361  | 3  | 6    |
| 4606655 | hypothetical protein LMO2365_0437 [Listeria monocytogenes str. 4b F2365]                          | 1         | 0.01      | 1.458     | 1  | 0      | 0  | 6    |
| 4606657 | Cof-like hydrolase [Listeria monocytogenes str. 4b F2365]                                         | 1         | 0.01      | 0.01      | 1  | 2.048  | 1  | 5.2  |
| 4606658 | sugar transporter, putative [Listeria monocytogenes str. 4b F2365]                                | 0.0001    | 0.01      | 4.103     | 2  | 0      | 0  | 1.2  |
| 4606659 | PRD/PTS system IIA2 domain protein [Listeria monocytogenes str. 4b F2365]                         | 0.0000001 | 0.0000001 | 7.174     | 1  | 7.174  | 1  | 3.52 |
| 4606663 | glycyl hydrolase, family 38 [Listeria monocytogenes str. 4b F2365]                                | 1         | 0.01      | 0.0001    | 1  | 2.887  | 2  | 2.11 |
| 4606666 | oxidoreductase, short-chain dehydrogenase/reductase family [Listeria monocytogenes str. 4b F2365] | 0.01      | 0.01      | 2.027     | 1  | 1.592  | 1  | 2.11 |
| 4606689 | internal A [Listeria monocytogenes str. 4b F2365]                                                 | 1         | 0.01      | 0.000001  | 1  | 6.549  | 4  | 1.8  |
| 4606691 | hypothetical protein LMO2365_0476 [Listeria monocytogenes str. 4b F2365]                          | 0.01      | 1E-10     | 9.987     | 1  | 17.902 | 4  | 4.5  |
| 4606695 | penicillin-binding protein [Listeria monocytogenes str. 4b F2365]                                 | 1E-10     | 1E-10     | 10.68     | 5  | 9.187  | 5  | 1.1  |
| 4606697 | transcriptional regulator, putative [Listeria monocytogenes str. 4b F2365]                        | 0.0001    | 0.0001    | 3.484     | 2  | 2.894  | 2  | 3.52 |
| 4606702 | peptidase, putative [Listeria monocytogenes str. 4b F2365]                                        | 1         | 0.01      | 0.000001  | 1  | 4.887  | 3  | 2.2  |
| 4606703 | hypothetical protein LMO2365_0488 [Listeria monocytogenes str. 4b F2365]                          | 1E-12     | 1E-20     | 9.987     | 1  | 6.902  | 5  | 5.2  |
| 4606712 | lipoprotein, putative [Listeria monocytogenes str. 4b F2365]                                      | 1         | 0.01      | 0.000001  | 1  | 6.487  | 3  | 1.8  |
| 4606719 | hypothetical protein LMO2365_0502 [Listeria monocytogenes str. 4b F2365]                          | 1         | 0.01      | 1.793     | 1  | 2.245  | 1  | 6    |
| 4606725 | antigen, putative [Listeria monocytogenes str. 4b F2365]                                          | 0.000001  | 1E-10     | 5.506     | 3  | 9.732  | 5  | 4.5  |
| 4606727 | hypothetical protein LMO2365_0510 [Listeria monocytogenes str. 4b F2365]                          | 0.01      | 0.01      | 1.75      | 0  | 0      | 0  | 5.2  |
| 4606728 | hypothetical protein LMO2365_0511 [Listeria monocytogenes str. 4b F2365]                          | 0.000001  | 1E-10     | 14.318    | 3  | 19.352 | 5  | 5.2  |
| 4606729 | hypothetical protein LMO2365_0513 [Listeria monocytogenes str. 4b F2365]                          | 1         | 0.01      | 0.0000001 | 1  | 5.728  | 4  | 5.1  |
| 4606734 | transcriptional regulator, LysR family [Listeria monocytogenes str. 4b F2365]                     | 1         | 0.01      | 1.709     | 1  | 0      | 0  | 3.52 |
| 4606741 | hypothetical protein LMO2365_0525 [Listeria monocytogenes str. 4b F2365]                          | 0.0001    | 0.0001    | 3.779     | 1  | 1.52   | 0  | 5.2  |
| 4606743 | ribose 5-phosphate isomerase B [Listeria monocytogenes str. 4b F2365]                             | 1         | 0.01      | 1.62      | 1  | 1.588  | 1  | 2.11 |
| 4606746 | PTS system, IIA2 domain protein [Listeria monocytogenes str. 4b F2365]                            | 0.000001  | 1E-14     | 5.597     | 3  | 12.096 | 7  | 3.52 |
| 4606748 | PTS system, IIA component [Listeria monocytogenes str. 4b F2365]                                  | 0.0000001 | 0.0001    | 8.536     | 4  | 4.45   | 2  | 1.2  |
| 4606750 | ribulose-phosphate 3-epimerase [Listeria monocytogenes str. 4b F2365]                             | 0.01      | 0.01      | 1.509     | 0  | 1.615  | 0  | 2.11 |
| 4606754 | ribose-phosphate pyrophosphokinase [Listeria monocytogenes str. 4b F2365]                         | 2         | 0.0001    | 0.000001  | 4  | 5.615  | 3  | 3.72 |
| 4606755 | lipoprotein, putative [Listeria monocytogenes str. 4b F2365]                                      | 0.000001  | 0.01      | 5.29      | 3  | 1.74   | 1  | 1.8  |
| 4606759 | cell wall surface anchor family protein [Listeria monocytogenes str. 4b F2365]                    | 0.000001  | 0.01      | 4.822     | 3  | 1.663  | 1  | 1.8  |
| 4606761 | capA domain protein [Listeria monocytogenes str. 4b F2365]                                        | 0.000001  | 1E-10     | 3.894     | 3  | 7.865  | 4  | 1.2  |
| 4606765 | hypothetical protein LMO2365_0553 [Listeria monocytogenes str. 4b F2365]                          | 0.0001    | 0.0001    | 1.599     | 0  | 0      | 0  | 5.2  |
| 4606774 | glycyl transferase, group 2 family protein [Listeria monocytogenes str. 4b F2365]                 | 1E-14     | 0.0000001 | 13.697    | 7  | 6.864  | 4  | 2.11 |
| 4606775 | hypothetical protein LMO2365_0559 [Listeria monocytogenes str. 4b F2365]                          | 1         | 0.01      | 0.01      | 1  | 1.117  | 1  | 5.2  |
| 4606780 | transcriptional regulator, LacI family [Listeria monocytogenes str. 4b F2365]                     | 1         | 0.01      | 2.916     | 1  | 0      | 0  | 3.52 |
| 4606781 | glycyl hydrolase, family 4 [Listeria monocytogenes str. 4b F2365]                                 | 0.0001    | 1E-12     | 3.558     | 1  | 12.326 | 6  | 5.2  |
| 4606786 | ABC transporter, substrate-binding protein [Listeria monocytogenes str. 4b F2365]                 | 1E-20     | 1E-26     | 31.152    | 10 | 42.745 | 13 | 1.2  |
| 4606788 | PTS system, glucitol/sorbitol-specific, IIIC component [Listeria monocytogenes str. 4b F2365]     | 0.000001  | 0.0001    | 5.349     | 3  | 3.566  | 2  | 1.2  |
| 4606790 | hypothetical protein LMO2365_0574 [Listeria monocytogenes str. 4b F2365]                          | 0.0000001 | 0.0001    | 10.072    | 4  | 5.429  | 2  | 4    |
| 4606794 | leucine rich repeat domain protein [Listeria monocytogenes str. 4b F2365]                         | 0.000001  | 0.000001  | 3.784     | 4  | 7.84   | 4  | 1.9  |
| 4606797 | hypothetical protein LMO2365_0581 [Listeria monocytogenes str. 4b F2365]                          | 2         | 0.0001    | 0.000001  | 2  | 5.59   | 3  | 1.8  |
| 4606798 | CBS domain protein [Listeria monocytogenes str. 4b F2365]                                         | 1E-10     | 0.0001    | 8.982     | 5  | 6.286  | 2  | 5.2  |
| 4606803 | hypothetical protein LMO2365_0587 [Listeria monocytogenes str. 4b F2365]                          | 1E-14     | 1E-14     | 20.049    | 7  | 20.591 | 7  | 5.2  |
| 4606807 | phosphoribosyl-AMP cyclodiphosphate [Listeria monocytogenes str. 4b F2365]                        | 0.0001    | 0.0001    | 3.744     | 1  | 0      | 0  | 5.2  |
| 4606812 | histidinol dehydrogenase [Listeria monocytogenes str. 4b F2365]                                   | 0.0001    | 0.01      | 3.925     | 2  | 2.149  | 1  | 2.2  |
| 4606814 | ATP phosphoribosyltransferase regulatory subunit, putative [Listeria monocytogenes str. 4b F2365] | 0.0001    | 0.01      | 3.911     | 2  | 1.633  | 1  | 2.2  |
| 4606816 | methylated-DNA-protein-cysteine methyltransferase [Listeria monocytogenes str. 4b F2365]          | 1         | 0.01      | 1.894     | 1  | 0      | 0  | 3.2  |
| 4606817 | hypothetical protein LMO2365_0601 [Listeria monocytogenes str. 4b F2365]                          | 0.0001    | 0.01      | 1.844     | 1  | 1.352  | 6  | 5.2  |
| 4606820 | transcriptional regulator, GntR family [Listeria monocytogenes str. 4b F2365]                     | 0.0001    | 0.01      | 1.411     | 1  | 0      | 0  | 3.52 |
| 4606823 | hypothetical protein LMO2365_0607 [Listeria monocytogenes str. 4b F2365]                          | 1         | 0.01      | 2.427     | 1  | 1.558  | 1  | 5.2  |
| 4606825 | phospholipase/carboxylesterase family protein [Listeria monocytogenes str. 4b F2365]              | 1         | 0.01      | 1.877     | 1  | 0      | 0  | 2.4  |
| 4606827 | protein P60 [Listeria monocytogenes str. 4b F2365]                                                | 0.0000001 | 0.0000001 | 9.177     | 1  | 9.177  | 4  | 5.2  |
| 4606829 | hypothetical protein LMO2365_0613 [Listeria monocytogenes str. 4b F2365]                          | 0.0000001 | 1E-10     | 6.905     | 4  | 8.543  | 5  | 5.2  |
| 4606831 | hypothetical protein LMO2365_0615 [Listeria monocytogenes str. 4b F2365]                          | 0.0001    | 0.000001  | 2.913     | 2  | 5.63   | 3  | 1.8  |
| 4606832 | hypothetical protein LMO2365_0616 [Listeria monocytogenes str. 4b F2365]                          | 0.0000001 | 0.000001  | 6.988     | 4  | 5.627  | 3  | 6    |
| 4606833 | deoxyribodipyrimidine photolyase [Listeria monocytogenes str. 4b F2365]                           | 3         | 0.01      | 0.000001  | 3  | 7.075  | 3  | 3.2  |
| 4606835 | DNA2 domain protein [Listeria monocytogenes str. 4b F2365]                                        | 0.0001    | 0.0001    | 3.354     | 1  | 3.684  | 2  | 4.4  |
| 4606838 | formate/nitrite transporter family protein [Listeria monocytogenes str. 4b F2365]                 | 1         | 0.01      | 1.979     | 1  | 0      | 0  | 1.2  |
| 4606840 | O-acetylhomoserine (thiol)-lyase [Listeria monocytogenes str. 4b F2365]                           | 0.000001  | 0.0001    | 9.012     | 3  | 9.524  | 2  | 2.2  |
| 4606844 | transcriptional regulator, PadR family [Listeria monocytogenes str. 4b F2365]                     | 0.0000001 | 0.0000001 | 6.849     | 4  | 7.953  | 4  | 3.52 |
| 4606845 | hypothetical protein LMO2365_0629 [Listeria monocytogenes str. 4b F2365]                          | 0.01      | 0.01      | 1.204     | 1  | 0      | 0  | 5.2  |
| 4606852 | ABC transporter, ATP-binding/permease protein [Listeria monocytogenes str. 4b F2365]              | 1E-10     | 1E-14     | 9.212     | 5  | 13.848 | 7  | 1.2  |
| 4606854 | rhodanese-like domain protein [Listeria monocytogenes str. 4b F2365]                              | 1         | 0.01      | 1.462     | 1  | 0      | 0  | 4.1  |
| 4606855 | LPX1G-motif cell wall anchor domain protein [Listeria monocytogenes str. 4b F2365]                | 0.0001    | 0.000001  | 4.476     | 2  | 6.086  | 3  | 1.8  |
| 4606858 | alcohol dehydrogenase, zinc-dependent [Listeria monocytogenes str. 4b F2365]                      | 0.0001    | 1E-12     | 6.13      | 1  | 16.843 | 6  | 2.11 |
| 4606861 | glycerophosphoryl diester phosphodiesterase family protein [Listeria monocytogenes str. 4b F2365] | 1         | 0.01      | 0.0001    | 1  | 4.018  | 2  | 2.11 |
| 4606862 | lipoprotein, putative [Listeria monocytogenes str. 4b F2365]                                      | 1E-12     | 0.0001    | 11.242    | 6  | 4.245  | 2  | 5.1  |
| 4606863 | protein kinase domain protein [Listeria monocytogenes str. 4b F2365]                              | 0.0001    | 0.000001  | 2.893     | 2  | 5.222  | 3  | 3.8  |
| 4606868 | hypothetical protein LMO2365_0653 [Listeria monocytogenes str. 4b F2365]                          | 1         | 0.01      | 1.599     | 0  | 0      | 0  | 5.1  |
| 4606870 | lipase/acylhydrolase, putative [Listeria monocytogenes str. 4b F2365]                             | 1E-12     | 1E-20     | 11.471    | 6  | 16.895 | 10 | 2.4  |
| 4606871 | hypothetical protein LMO2365_0655 [Listeria monocytogenes str. 4b F2365]                          | 1         | 0.01      | 1.539     | 1  | 0      | 0  | 5.2  |
| 4606876 | PTS system, fructose-specific, IIA component, putative [Listeria monocytogenes str. 4b F2365]     | 1         | 0.01      | 1.848     | 1  | 1.473  | 1  | 1.2  |
| 4606878 | PTS system, fructose-specific, IIB component, putative [Listeria monocytogenes str. 4b F2365]     | 0.0001    | 0.0000001 | 4.537     | 1  | 4.735  | 1  | 1.8  |
| 4606882 | methyltransferase, UbiC/QXS family [Listeria monocytogenes str. 4b F2365]                         | 0.000001  | 1E-14     | 6.534     | 3  | 13.918 | 7  | 3.6  |
| 4606886 | oxidoreductase, aldo/keto reductase family [Listeria monocytogenes str. 4b F2365]                 | 1         | 0.01      | 1.517     | 1  | 2.083  | 1  | 2.11 |
| 4606887 | cadmium-translocating P-type ATPase [Listeria monocytogenes str. 4b F2365]                        | 1E-12     | 1E-12     | 9.709     | 6  | 9.836  | 6  | 1.2  |
| 4606890 | sulfatase family protein [Listeria monocytogenes str. 4b F2365]                                   | 0.0001    | 0.01      | 3.344     | 1  | 1.597  | 0  | 5.2  |
| 4606892 | glyoxalase family protein [Listeria monocytogenes str. 4b F2365]                                  | 1         | 0.01      | 2.141     | 0  | 0      | 0  | 5.2  |
| 4606894 | magnesium transporter, CorA family [Listeria monocytogenes str. 4b F2365]                         | 1         | 0.01      | 3.556     | 1  | 1.271  | 1  | 3.52 |
| 4606895 | transcriptional regulator, GntR family [Listeria monocytogenes str. 4b F2365]                     | 1E-12     | 1E-10     | 12.077    | 6  | 11.164 | 5  | 5.2  |
| 4606898 | acetyltransferase, CNAI family [Listeria monocytogenes str. 4b F2365]                             | 0.0000001 | 0.000001  | 11.65     | 4  | 5.562  | 3  | 4    |
| 4606899 | hypothetical protein LMO2365_0684 [Listeria monocytogenes str. 4b F2365]                          | 0.01      | 0.01      | 1.271     | 1  | 0      | 0  | 2.45 |
| 4606900 | hypothetical protein LMO2365_0685 [Listeria monocytogenes str. 4b F2365]                          | 0.000001  | 0.01      | 5.593     | 3  | 2.105  | 1  | 6    |
| 4606904 | hypothetical protein LMO2365_0689 [Listeria monocytogenes str. 4b F2365]                          | 1         | 0.        |           |    |        |    |      |

|          |                                                                                                                           |            |  |            |        |    |        |    |      |
|----------|---------------------------------------------------------------------------------------------------------------------------|------------|--|------------|--------|----|--------|----|------|
| 46907026 | RarD protein [Listeria monocytogenes str. 4b F2365]                                                                       | 0.01       |  | 0.01       | 3.088  | 1  | 2.428  | 1  | 5.2  |
| 46907032 | hypothetical protein LMOQ2365_0818 [Listeria monocytogenes str. 4b F2365]                                                 | 0.01       |  | 0.01       | 1.399  | 1  | 1.98   | 1  | 2.3  |
| 46907033 | Na <sup>+</sup> /H <sup>+</sup> antiporter [Listeria monocytogenes str. 4b F2365]                                         | 0.00000001 |  | 0.00000001 | 8.263  | 1  | 7.583  | 1  | 1.2  |
| 46907034 | hypothetical protein LMOQ2365_0820 [Listeria monocytogenes str. 4b F2365]                                                 | 0.01       |  |            | 1.32   | 1  | 0      | 0  | 5.1  |
| 46907035 | hypothetical protein LMOQ2365_0821 [Listeria monocytogenes str. 4b F2365]                                                 | 0.01       |  | 0.0001     | 2.17   | 1  | 3.316  | 2  | 5.1  |
| 46907037 | spermidine/putrescine ABC transporter, ATP-binding protein [Listeria monocytogenes str. 4b F2365]                         | 0.01       |  |            | 2.358  | 1  | 0      | 0  | 2.2  |
| 46907040 | spermidine/putrescine ABC transporter, spermidine/putrescine-binding protein [Listeria monocytogenes str. 4b F2365]       | 0.01       |  | 0.0001     | 2.045  | 1  | 3.842  | 2  | 1.2  |
| 46907041 | carbonic anhydrase [Listeria monocytogenes str. 4b F2365]                                                                 | 0.01       |  | 0.000001   | 3.24   | 1  | 8.628  | 3  | 2.1  |
| 46907042 | HD domain protein [Listeria monocytogenes str. 4b F2365]                                                                  | 0.01       |  |            | 1.757  | 1  | 0      | 0  | 5.2  |
| 46907044 | enoyl-(acyl-carrier-protein) reductase [Listeria monocytogenes str. 4b F2365]                                             | 0.01       |  | 0.0001     | 1.845  | 1  | 3.673  | 2  | 2.1  |
| 46907050 | hypothetical protein LMOQ2365_0836 [Listeria monocytogenes str. 4b F2365]                                                 | 1E-10      |  | 0.000001   | 7.952  | 5  | 4.957  | 3  | 2.6  |
| 46907051 | cation transport ATPase, F1-F2 family [Listeria monocytogenes str. 4b F2365]                                              | 0.0001     |  | 0.01       | 3.87   | 1  | 3.916  | 2  | 5.2  |
| 46907060 | pyruvate flavodoxin/ferredoxin oxidoreductase [Listeria monocytogenes str. 4b F2365]                                      | 0.000001   |  | 1E-16      | 5.746  | 3  | 13.959 | 8  | 1.4  |
| 46907065 | hypothetical protein LMOQ2365_0851 [Listeria monocytogenes str. 4b F2365]                                                 | 0.0001     |  |            | 3.167  | 2  | 0      | 0  | 5.1  |
| 46907066 | cell wall surface anchor family protein [Listeria monocytogenes str. 4b F2365]                                            | 2.0001     |  |            | 3.596  | 2  | 0      | 0  | 1.8  |
| 46907073 | endoribonuclease L <sub>1</sub> -P98, putative [Listeria monocytogenes str. 4b F2365]                                     | 0.00000001 |  | 0.01       | 6.686  | 1  | 1.676  | 1  | 5.2  |
| 46907076 | vitamin-B12 independent methionine synthase family protein [Listeria monocytogenes str. 4b F2365]                         | 0.0001     |  |            | 3.349  | 2  | 0      | 0  | 5.2  |
| 46907077 | exonuclease ABC subunit C domain protein [Listeria monocytogenes str. 4b F2365]                                           | 0.01       |  |            | 2.117  | 1  | 0      | 0  | 3.2  |
| 46907078 | glutamine ABC transporter, permease/substrate-binding protein [Listeria monocytogenes str. 4b F2365]                      | 0.000001   |  | 0.000001   | 4.557  | 3  | 3.728  | 3  | 1.2  |
| 46907079 | glutamine ABC transporter, permease/substrate-binding protein [Listeria monocytogenes str. 4b F2365]                      | 0.0001     |  | 0.01       | 1.614  | 1  | 1.614  | 1  | 5.2  |
| 46907081 | hypothetical protein LMOQ2365_0867 [Listeria monocytogenes str. 4b F2365]                                                 | 0.01       |  |            | 1.823  | 1  | 0      | 0  | 6    |
| 46907082 | hypothetical protein LMOQ2365_0868 [Listeria monocytogenes str. 4b F2365]                                                 | 0.0001     |  |            | 3.191  | 2  | 0      | 0  | 6    |
| 46907086 | D-alanylalanine synthetase [Listeria monocytogenes str. 4b F2365]                                                         | 0.01       |  | 0.01       | 1.342  | 1  | 1.734  | 1  | 1.1  |
| 46907087 | UDP-N-acetylglucosyl-1-tyrosine-D-alanyl-D-alanine ligase [Listeria monocytogenes str. 4b F2365]                          | 1E-14      |  | 1E-12      | 14.553 | 7  | 12.717 | 6  | 1.1  |
| 46907089 | DNA-binding transcriptional regulator, putative [Listeria monocytogenes str. 4b F2365]                                    | 0.01       |  | 0.01       | 1.665  | 1  | 1.856  | 1  | 3.52 |
| 46907090 | sugar ABC transporter, sugar-binding protein [Listeria monocytogenes str. 4b F2365]                                       | 0.01       |  | 0.01       | 2.299  | 1  | 1.689  | 1  | 1.2  |
| 46907091 | sugar ABC transporter, permease protein [Listeria monocytogenes str. 4b F2365]                                            | 0.01       |  |            | 2.05   | 1  | 0      | 0  | 1.2  |
| 46907093 | chalcone-6-phosphate hydrolase [Listeria monocytogenes str. 4b F2365]                                                     | 0.00000001 |  | 0.0001     | 6.322  | 1  | 3.322  | 1  | 2.1  |
| 46907095 | hypothetical protein LMOQ2365_0881 [Listeria monocytogenes str. 4b F2365]                                                 | 0.00000001 |  | 0.01       | 5.783  | 4  | 1.722  | 1  | 5.2  |
| 46907096 | phosphoglucosyltransferase/phosphotransferase family protein [Listeria monocytogenes str. 4b F2365]                       | 0.0001     |  | 0.0001     | 3.575  | 2  | 3.887  | 2  | 2.1  |
| 46907098 | ATP-dependent RNA helicase Dax1 [Listeria monocytogenes str. 4b F2365]                                                    | 0.0001     |  | 0.0001     | 1.644  | 1  | 4.444  | 3  | 3.6  |
| 46907101 | hypothetical protein LMOQ2365_0887 [Listeria monocytogenes str. 4b F2365]                                                 | 0.01       |  | 0.01       | 1.587  | 1  | 1.788  | 1  | 5.2  |
| 46907102 | hypothetical protein LMOQ2365_0888 [Listeria monocytogenes str. 4b F2365]                                                 | 0.01       |  |            | 2.016  | 0  | 0      | 0  | 5.2  |
| 46907105 | major facilitator family transporter [Listeria monocytogenes str. 4b F2365]                                               | 0.01       |  |            | 2.243  | 1  | 0      | 0  | 1.2  |
| 46907106 | PTS system IIA2 domain protein [Listeria monocytogenes str. 4b F2365]                                                     | 0.000001   |  | 0.0001     | 4.969  | 3  | 3.355  | 2  | 3.52 |
| 46907108 | PTS system, beta-glucoside-specific, IIB component [Listeria monocytogenes str. 4b F2365]                                 | 0.01       |  | 0.01       | 1.472  | 1  | 1.944  | 1  | 1.1  |
| 46907110 | glucosamine-6-phosphate isomerase, putative [Listeria monocytogenes str. 4b F2365]                                        | 0.01       |  | 0.0001     | 2.147  | 1  | 3.876  | 1  | 2.1  |
| 46907113 | lysM domain protein [Listeria monocytogenes str. 4b F2365]                                                                | 0.01       |  |            | 1.814  | 1  | 0      | 0  | 1.8  |
| 46907119 | alanine racemase [Listeria monocytogenes str. 4b F2365]                                                                   | 0.0001     |  | 0.000001   | 5.323  | 2  | 7.659  | 3  | 2.2  |
| 46907120 | hypothetical protein LMOQ2365_0906 [Listeria monocytogenes str. 4b F2365]                                                 | 0.01       |  |            | 1.819  | 1  | 0      | 0  | 5.2  |
| 46907124 | sigma factor B regulator protein [Listeria monocytogenes str. 4b F2365]                                                   | 0.01       |  | 0.01       | 1.763  | 1  | 1.331  | 1  | 4.1  |
| 46907128 | sigma-B negative effector, putative [Listeria monocytogenes str. 4b F2365]                                                | 0.01       |  |            | 1.52   | 1  | 0      | 0  | 4.1  |
| 46907129 | sulfate permease family protein [Listeria monocytogenes str. 4b F2365]                                                    | 0.000001   |  | 1E-14      | 5.828  | 3  | 13.918 | 7  | 1.2  |
| 46907130 | SI RNA binding domain protein [Listeria monocytogenes str. 4b F2365]                                                      | 2.0001     |  | 0.01       | 2.875  | 2  | 2.197  | 1  | 5.2  |
| 46907131 | hypothetical protein LMOQ2365_0918 [Listeria monocytogenes str. 4b F2365]                                                 | 0.01       |  |            | 1.587  | 1  | 1.576  | 1  | 5.2  |
| 46907134 | hypothetical protein LMOQ2365_0921 [Listeria monocytogenes str. 4b F2365]                                                 | 0.01       |  | 0.01       | 1.577  | 1  | 1.704  | 1  | 5.2  |
| 46907136 | transcriptional regulator, GntR family [Listeria monocytogenes str. 4b F2365]                                             | 0.01       |  |            | 1.409  | 1  | 0      | 0  | 3.52 |
| 46907139 | hypothetical protein LMOQ2365_0926 [Listeria monocytogenes str. 4b F2365]                                                 | 0.0001     |  |            | 4.021  | 2  | 0      | 0  | 6    |
| 46907141 | glutathione reductase [Listeria monocytogenes str. 4b F2365]                                                              | 0.01       |  | 1E-12      | 26.811 | 12 | 15.212 | 11 | 2.1  |
| 46907142 | phosphoglycerate mutase family protein [Listeria monocytogenes str. 4b F2365]                                             | 2.0001     |  | 1E-12      | 4.184  | 2  | 10.91  | 6  | 2.12 |
| 46907150 | PTS system, IIC component [Listeria monocytogenes str. 4b F2365]                                                          | 0.01       |  | 0.01       | 1.782  | 1  | 1.661  | 1  | 1.2  |
| 46907153 | PKD/PTS system IIA2 domain protein [Listeria monocytogenes str. 4b F2365]                                                 | 0.0001     |  | 0.000001   | 3.018  | 2  | 4.06   | 3  | 3.52 |
| 46907154 | ABC transporter, ATP-binding protein [Listeria monocytogenes str. 4b F2365]                                               | 0.0001     |  | 0.000001   | 4.077  | 3  | 4.077  | 3  | 2.4  |
| 46907163 | sortase family protein [Listeria monocytogenes str. 4b F2365]                                                             | 0.00000001 |  | 0.000001   | 7.062  | 1  | 5.212  | 3  | 1.8  |
| 46907164 | hypothetical protein LMOQ2365_0951 [Listeria monocytogenes str. 4b F2365]                                                 | 0.01       |  | 0.0001     | 4.386  | 1  | 6.226  | 2  | 5.2  |
| 46907165 | lipoyltransferase and lipoyate-proline ligase family protein [Listeria monocytogenes str. 4b F2365]                       | 0.01       |  | 0.01       | 1.495  | 1  | 1.849  | 1  | 2.4  |
| 46907173 | hypothetical protein LMOQ2365_0961 [Listeria monocytogenes str. 4b F2365]                                                 | 0.00000001 |  | 0.00000001 | 7.27   | 4  | 6.499  | 4  | 5.2  |
| 46907176 | hypothetical protein LMOQ2365_0964 [Listeria monocytogenes str. 4b F2365]                                                 | 0.01       |  |            | 5.332  | 1  | 0      | 0  | 5.2  |
| 46907180 | transcriptional regulator, GntR family [Listeria monocytogenes str. 4b F2365]                                             | 0.0001     |  | 1E-10      | 4.392  | 2  | 9.319  | 5  | 3.52 |
| 46907183 | hypothetical protein LMOQ2365_0971 [Listeria monocytogenes str. 4b F2365]                                                 | 0.01       |  |            | 1.66   | 1  | 0      | 0  | 5.2  |
| 46907188 | N-acetylglucosamine-6-phosphate deacetylase [Listeria monocytogenes str. 4b F2365]                                        | 1E-24      |  | 1E-22      | 27.681 | 12 | 24.816 | 11 | 2.1  |
| 46907189 | glucosamine-6-phosphate isomerase, putative [Listeria monocytogenes str. 4b F2365]                                        | 0.01       |  | 0.01       | 1.656  | 1  | 1.751  | 1  | 5.2  |
| 46907191 | Ihm protein [Listeria monocytogenes str. 4b F2365]                                                                        | 0.01       |  | 0.01       | 1.614  | 1  | 1.832  | 1  | 1.1  |
| 46907197 | hypothetical protein LMOQ2365_0985 [Listeria monocytogenes str. 4b F2365]                                                 | 0.01       |  |            | 1.402  | 1  | 0      | 0  | 5.2  |
| 46907200 | inorganic polyphosphate/ATP-NAD kinase [Listeria monocytogenes str. 4b F2365]                                             | 1E-12      |  | 0.000001   | 9.827  | 6  | 6.282  | 3  | 1.1  |
| 46907203 | DND protein [Listeria monocytogenes str. 4b F2365]                                                                        | 0.000001   |  | 1E-12      | 7.125  | 4  | 10.605 | 6  | 1.1  |
| 46907205 | DHB protein [Listeria monocytogenes str. 4b F2365]                                                                        | 0.01       |  | 0.01       | 2.019  | 1  | 1.679  | 1  | 1.1  |
| 46907206 | D-alanine-D-alanyl carrier protein ligase [Listeria monocytogenes str. 4b F2365]                                          | 0.000001   |  | 1E-12      | 5.036  | 3  | 10.052 | 6  | 1.1  |
| 46907208 | ribose 5-phosphate isomerase A [Listeria monocytogenes str. 4b F2365]                                                     | 0.01       |  | 0.000001   | 1.619  | 1  | 5.448  | 3  | 3.52 |
| 46907209 | acetyltransferase, GNAF family [Listeria monocytogenes str. 4b F2365]                                                     | 0.0001     |  |            | 3.22   | 0  | 0      | 0  | 5.2  |
| 46907211 | branched-chain amino acid aminotransferase [Listeria monocytogenes str. 4b F2365]                                         | 0.0001     |  | 0.000001   | 3.576  | 2  | 4.405  | 3  | 2.2  |
| 46907213 | ABC transporter, permease protein [Listeria monocytogenes str. 4b F2365]                                                  | 0.0001     |  | 0.01       | 3.233  | 2  | 1.552  | 1  | 1.2  |
| 46907215 | hypothetical protein LMOQ2365_1003 [Listeria monocytogenes str. 4b F2365]                                                 | 1E-14      |  | 1E-14      | 21.243 | 7  | 18.979 | 7  | 2.1  |
| 46907216 | glutathione reductase [Listeria monocytogenes str. 4b F2365]                                                              | 0.01       |  |            | 1.592  | 1  | 0      | 0  | 4.1  |
| 46907225 | cation transport protein [Listeria monocytogenes str. 4b F2365]                                                           | 0.00000001 |  | 0.00000001 | 7.164  | 4  | 7.021  | 4  | 1.2  |
| 46907229 | ATP-dependent Clp protease, ATP-binding subunit ClpE [Listeria monocytogenes str. 4b F2365]                               | 0.00000001 |  |            | 7.946  | 4  | 0      | 0  | 4.1  |
| 46907232 | phytylene dehydrogenase, putative [Listeria monocytogenes str. 4b F2365]                                                  | 0.01       |  | 0.0001     | 1.883  | 1  | 2.916  | 2  | 2.1  |
| 46907237 | 3-hydroxyisobutyrate dehydrogenase family protein [Listeria monocytogenes str. 4b F2365]                                  | 0.01       |  | 0.000001   | 4.674  | 1  | 3.674  | 1  | 2.4  |
| 46907238 | aromatic amino acid aminotransferase, putative [Listeria monocytogenes str. 4b F2365]                                     | 2.0001     |  | 0.0001     | 4.209  | 2  | 4.379  | 2  | 2.2  |
| 46907242 | transcriptional regulator, LysR family [Listeria monocytogenes str. 4b F2365]                                             | 1E-14      |  | 1E-14      | 13.619 | 7  | 11.267 | 7  | 3.52 |
| 46907244 | peptidase, M20/M25/M40 family [Listeria monocytogenes str. 4b F2365]                                                      | 0.01       |  |            | 1.993  | 1  | 0      | 0  | 2.2  |
| 46907245 | mechanosensitive ion channel family protein [Listeria monocytogenes str. 4b F2365]                                        | 0.01       |  | 0.01       | 1.465  | 1  | 1.577  | 1  | 4.1  |
| 46907249 | PTS system, glucose-specific, IIA component, putative [Listeria monocytogenes str. 4b F2365]                              | 0.01       |  |            | 1.977  | 0  | 0      | 0  | 1.2  |
| 46907250 | cucC family protein [Listeria monocytogenes str. 4b F2365]                                                                | 0.000001   |  | 0.01       | 4.578  | 3  | 1.474  | 1  | 4.2  |
| 46907251 | hypothetical protein LMOQ2365_1040 [Listeria monocytogenes str. 4b F2365]                                                 | 0.0001     |  | 0.000001   | 3.993  | 2  | 6.134  | 3  | 5.2  |
| 46907252 | hypothetical protein LMOQ2365_1041 [Listeria monocytogenes str. 4b F2365]                                                 | 0.01       |  | 0.01       | 1.971  | 1  | 0      | 0  | 1.1  |
| 46907253 | histidine kinase, putative [Listeria monocytogenes str. 4b F2365]                                                         | 1E-12      |  | 0.0001     | 11.659 | 1  | 3.946  | 1  | 1.2  |
| 46907258 | transcriptional regulator, putative [Listeria monocytogenes str. 4b F2365]                                                | 0.01       |  |            | 1.915  | 1  | 0      | 0  | 3.52 |
| 46907263 | hypothetical protein LMOQ2365_1052 [Listeria monocytogenes str. 4b F2365]                                                 | 0.01       |  | 0.0001     | 1.534  | 1  | 3.183  | 2  | 5.2  |
| 46907264 | transketolase, N-terminal subunit [Listeria monocytogenes str. 4b F2365]                                                  | 1E-14      |  | 1E-22      | 11.118 | 7  | 19.755 | 11 | 2.1  |
| 46907266 | glycerol kinase [Listeria monocytogenes str. 4b F2365]                                                                    | 0.00000001 |  | 0.000001   | 6.509  | 7  | 5.429  | 3  | 1.2  |
| 46907268 | hypothetical protein LMOQ2365_1057 [Listeria monocytogenes str. 4b F2365]                                                 | 0.01       |  |            | 1.409  | 1  | 0      | 0  | 6    |
| 46907271 | molYbndum ABC transporter, ATP-binding protein [Listeria monocytogenes str. 4b F2365]                                     | 0.00000001 |  | 1E-16      | 7.694  | 4  | 14.031 | 8  | 1.2  |
| 46907276 | molYbndum cofactor biosynthesis protein E [Listeria monocytogenes str. 4b F2365]                                          | 0.01       |  | 0.01       | 1.751  | 1  | 1.691  | 1  | 2.5  |
| 46907279 | molYbndum cofactor biosynthesis protein I [Listeria monocytogenes str. 4b F2365]                                          | 0.01       |  | 0.01       | 1.53   | 1  | 1.767  | 1  | 7    |
| 46907280 | molYbndum cofactor biosynthesis protein B [Listeria monocytogenes str. 4b F2365]                                          | 0.01       |  | 0.0001     | 2.285  | 1  | 3.356  | 2  | 2.5  |
| 46907281 | molYbndum biosynthesis protein MoeB [Listeria monocytogenes str. 4b F2365]                                                | 0.01       |  | 0.01       | 2.648  | 1  | 1.479  | 1  | 2.5  |
| 46907284 | pyruvate dehydrogenase complex, E1 component, pyruvate dehydrogenase alpha subunit [Listeria monocytogenes str. 4b F2365] | 1E-38      |  | 1E-46      | 65.718 | 19 | 78.219 | 23 | 2.12 |
| 46907286 | dihydroxyacid dehydrogenase [Listeria monocytogenes str. 4b F2365]                                                        | 1E-10      |  | 1E-10      | 16.44  | 7  | 16.483 | 7  | 2.12 |
| 46907287 | dihydroxyacid dehydrogenase [Listeria monocytogenes str. 4b F2365]                                                        | 1E-18      |  | 1E-24      | 31.121 | 9  | 51.85  | 12 | 2.12 |
| 46907288 | hypothetical protein LMOQ2365_1077 [Listeria monocytogenes str. 4b F2365]                                                 | 0.01       |  |            | 1.95   | 1  | 0      | 0  | 6    |
| 46907289 | lactate/malate dehydrogenase family protein [Listeria monocytogenes str. 4b F2365]                                        | 0.00000001 |  | 1E-16      | 6.738  | 4  | 14.229 | 8  | 2.1  |
| 46907291 | hypothetical protein LMOQ2365_1063 [Listeria monocytogenes str. 4b F2365]                                                 | 0.01       |  | 1E-32      | 6.153  | 16 | 72.52  | 6  | 1.1  |
| 46907292 | magnesium transporter, CuxA family [Listeria monocytogenes str. 4b F2365]                                                 | 0.000001   |  | 0.00000001 | 5.825  | 1  | 8.62   | 4  | 1.2  |
| 46907294 | inositol monophosphatase family protein [Listeria monocytogenes str. 4b F2365]                                            | 0.01       |  |            | 1.765  | 1  | 0      | 0  | 2.1  |
| 46907295 | GTP-binding protein TyaA [Listeria monocytogenes str. 4b F2365]                                                           | 0.01       |  | 0.000001   | 1.512  | 1  | 5.073  | 3  | 3.74 |
| 46907297 | hypothetical protein LMOQ2365_1086 [Listeria monocytogenes str. 4b F2365]                                                 | 0.01       |  | 0.01       | 1.453  | 1  | 4.823  | 4  | 5.2  |
| 46907298 | hypothetical protein LMOQ2365_1087 [Listeria monocytogenes str. 4b F2365]                                                 | 2.0001     |  | 2.0001     | 3.097  | 2  | 4.2    | 3  | 5.2  |
| 46907301 | ABC transporter, substrate-binding protein [Listeria monocytogenes str. 4b F2365]                                         | 1E-12      |  | 0.0001     | 13.308 | 6  | 4.788  | 2  | 1    |

|          |                                                                                                            |           |            |          |     |          |     |       |
|----------|------------------------------------------------------------------------------------------------------------|-----------|------------|----------|-----|----------|-----|-------|
| 46907443 | ABC transporter, permease protein [Listeria monocytogenes str. 4b F2365]                                   | 0.0001    | 1E-14      | 3.786    | 2   | 14.133   | 7   | 3.5,2 |
| 46907445 | membrane protein, MmpL family [Listeria monocytogenes str. 4b F2365]                                       | 1E-14     | 1E-20      | 14.141   | 7   | 20.258   | 10  | 1,2   |
| 46907451 | recombination and DNA strand exchange inhibitor protein [Listeria monocytogenes str. 4b F2365]             | 1E-12     | 1E-20      | 10.007   | 6   | 15.007   | 7   | 3,2   |
| 46907454 | aspartate kinase II [Listeria monocytogenes str. 4b F2365]                                                 | 0.01      | 0.000001   | 1.825    | 1   | 4.198    | 3   | 2,2   |
| 46907456 | glutamate racemase [Listeria monocytogenes str. 4b F2365]                                                  | 0.01      | 1E-10      | 1.953    | 1   | 7.746    | 5   | 1,1   |
| 46907464 | hypothetical protein LMO2365_1255 [Listeria monocytogenes str. 4b F2365]                                   | 1E-10     | 1E-10      | 9.868    | 5   | 8.476    | 5   | 5,2   |
| 46907467 | phosphoglycerate mutase family protein [Listeria monocytogenes str. 4b F2365]                              | 0.01      | 0.000001   | 2.516    | 1   | 2.716    | 3   | 2,1,2 |
| 46907469 | ATP-dependent RNA helicase DhpA [Listeria monocytogenes str. 4b F2365]                                     | 0.0000001 | 1E-20      | 7.115    | 4   | 14.479   | 10  | 3,5,3 |
| 46907473 | transporter, putative [Listeria monocytogenes str. 4b F2365]                                               | 0.01      | 0.01       | 2.113    | 1   | 1.413    | 1   | 1,2   |
| 46907474 | transcriptional regulator, putative [Listeria monocytogenes str. 4b F2365]                                 | 0.01      | 0.01       | 1.487    | 1   | 0        | 0   | 3,5,2 |
| 46907483 | hypothetical protein LMO2365_1274 [Listeria monocytogenes str. 4b F2365]                                   | 0.0001    | 0.000001   | 3.763    | 2   | 4.422    | 3   | 6     |
| 46907486 | gamma-glutamyl kinase [Listeria monocytogenes str. 4b F2365]                                               | 0.01      | 0.01       | 1.459    | 1   | 1.459    | 1   | 2,2   |
| 46907489 | DNA-binding protein [Listeria monocytogenes str. 4b F2365]                                                 | 0.01      | 0.01       | 1.397    | 1   | 1.344    | 1   | 3,5,2 |
| 46907490 | hypothetical protein LMO2365_1281 [Listeria monocytogenes str. 4b F2365]                                   | 0.0001    | 0.0001     | 3.227    | 2   | 0        | 0   | 6     |
| 46907495 | ATP-dependent protease ATP-binding subunit [Listeria monocytogenes str. 4b F2365]                          | 0.0001    | 0.00000001 | 3.641    | 2   | 6.992    | 4   | 4,1   |
| 46907497 | signal peptidase I [Listeria monocytogenes str. 4b F2365]                                                  | 0.01      | 0.0001     | 1.446    | 1   | 1.446    | 1   | 1,6   |
| 46907501 | Snf family protein [Listeria monocytogenes str. 4b F2365]                                                  | 0.01      | 0.0001     | 1.513    | 1   | 4.53     | 2   | 3,8   |
| 46907502 | DNA topoisomerase I [Listeria monocytogenes str. 4b F2365]                                                 | 0.0000001 | 1E-12      | 7.075    | 4   | 10.445   | 6   | 3,4   |
| 46907503 | glucose-inhibited division protein A [Listeria monocytogenes str. 4b F2365]                                | 0.000001  | 1E-26      | 5.945    | 3   | 25.488   | 13  | 1,7   |
| 46907505 | ATP-dependent protease peptidase subunit [Listeria monocytogenes str. 4b F2365]                            | 0.01      | 0.01       | 1.269    | 1   | 0        | 0   | 4,1   |
| 46907506 | ATP-dependent protease ATP-binding subunit [Listeria monocytogenes str. 4b F2365]                          | 0.0001    | 0.00000001 | 4.121    | 2   | 6.077    | 4   | 1,7   |
| 46907510 | aldose epimerase family protein [Listeria monocytogenes str. 4b F2365]                                     | 0.0001    | 0.01       | 3.367    | 2   | 1.827    | 1   | 5,2   |
| 46907515 | DNA topoisomerase IV subunit B [Listeria monocytogenes str. 4b F2365]                                      | 1E-10     | 1E-16      | 12.384   | 5   | 17.523   | 8   | 3,4   |
| 46907517 | acylttransferase family protein [Listeria monocytogenes str. 4b F2365]                                     | 0.01      | 0.0001     | 1.468    | 1   | 3.536    | 1   | 1,1   |
| 46907523 | hypothetical protein LMO2365_1314 [Listeria monocytogenes str. 4b F2365]                                   | 0.0001    | 0.0001     | 3.522    | 2   | 0        | 0   | 4,2   |
| 46907525 | transcriptional repressor GlnR [Listeria monocytogenes str. 4b F2365]                                      | 0.0000001 | 0.0001     | 7.027    | 4   | 3.667    | 2   | 3,5,2 |
| 46907526 | glutamine synthetase, type I [Listeria monocytogenes str. 4b F2365]                                        | 0.01      | 0.00000001 | 2.285    | 1   | 8.433    | 4   | 2,2   |
| 46907531 | hypothetical protein LMO2365_1322 [Listeria monocytogenes str. 4b F2365]                                   | 0.0001    | 0.01       | 1.213    | 1   | 1.213    | 1   | 5,2   |
| 46907532 | manketolase [Listeria monocytogenes str. 4b F2365]                                                         | 1E-12     | 0.000001   | 11.99    | 6   | 5.493    | 3   | 2,1,2 |
| 46907533 | hypothetical protein LMO2365_1324 [Listeria monocytogenes str. 4b F2365]                                   | 1E-14     | 1E-12      | 13.112   | 7   | 12.001   | 6   | 5,2   |
| 46907535 | ParB-like nuclease domain protein [Listeria monocytogenes str. 4b F2365]                                   | 0.01      | 0.01       | 1.347    | 1   | 2.091    | 1   | 3,4   |
| 46907536 | hypothetical protein LMO2365_1327 [Listeria monocytogenes str. 4b F2365]                                   | 0.0001    | 0.01       | 2.197    | 2   | 3.197    | 2   | 5,2   |
| 46907537 | SNF2 family domain protein [Listeria monocytogenes str. 4b F2365]                                          | 0.01      | 0.01       | 1.639    | 1   | 1.689    | 1   | 3,5,3 |
| 46907539 | uridylyl kinase [Listeria monocytogenes str. 4b F2365]                                                     | 0.0001    | 0.0001     | 2.065    | 2   | 3.065    | 2   | 2,3   |
| 46907543 | 1-deoxy-D-xylulose 5-phosphate reductoisomerase [Listeria monocytogenes str. 4b F2365]                     | 1E-10     | 0.000001   | 11.031   | 5   | 5.03     | 3   | 5,2   |
| 46907544 | membrane-associated zinc metalloprotease, putative [Listeria monocytogenes str. 4b F2365]                  | 1E-18     | 1E-24      | 17.834   | 9   | 23.445   | 12  | 9     |
| 46907545 | prolyl-4RNA synthetase [Listeria monocytogenes str. 4b F2365]                                              | 0.0001    | 0.0001     | 1.594    | 1   | 5.386    | 9   | 3,7,2 |
| 46907548 | transcription elongation factor NusA [Listeria monocytogenes str. 4b F2365]                                | 0.0001    | 0.000001   | 3.314    | 2   | 4.806    | 3   | 3,5,4 |
| 46907551 | translation initiation factor IF-2 [Listeria monocytogenes str. 4b F2365]                                  | 0.01      | 1E-10      | 1.571    | 1   | 8.213    | 5   | 3,7,3 |
| 46907553 | ribosome-binding factor A [Listeria monocytogenes str. 4b F2365]                                           | 0.0001    | 0.0001     | 3.614    | 2   | 5.201    | 3   | 3,7,3 |
| 46907555 | ribonin biosynthesis protein Rbf [Listeria monocytogenes str. 4b F2365]                                    | 0.01      | 0.0001     | 3.517    | 1   | 3.517    | 1   | 2,5   |
| 46907559 | hypothetical protein LMO2365_1350 [Listeria monocytogenes str. 4b F2365]                                   | 0.01      | 0.01       | 1.584    | 1   | 0        | 0   | 5,2   |
| 46907560 | hypothetical protein LMO2365_1351 [Listeria monocytogenes str. 4b F2365]                                   | 0.01      | 0.000001   | 2.201    | 1   | 5.671    | 3   | 5,2   |
| 46907562 | 5-formyltetrahydrofolate cyclo-ligase family protein [Listeria monocytogenes str. 4b F2365]                | 0.0001    | 0.01       | 4.266    | 2   | 2.8      | 1   | 2,5   |
| 46907566 | lipoprotein, putative [Listeria monocytogenes str. 4b F2365]                                               | 0.01      | 0.000001   | 1.594    | 1   | 5.386    | 9   | 1,8   |
| 46907573 | general secretion pathway protein E [Listeria monocytogenes str. 4b F2365]                                 | 0.01      | 0.01       | 1.639    | 1   | 1.475    | 1   | 1,1   |
| 46907574 | glycine cleavage system T protein [Listeria monocytogenes str. 4b F2365]                                   | 0.0000001 | 0.000001   | 7.931    | 4   | 5.472    | 3   | 7     |
| 46907575 | glycine dehydrogenase subunit 1 [Listeria monocytogenes str. 4b F2365]                                     | 1E-14     | 0.000001   | 19.477   | 7   | 5.805    | 3   | 3     |
| 46907577 | rhodanese-like domain protein [Listeria monocytogenes str. 4b F2365]                                       | 0.01      | 0.01       | 1.748    | 1   | 1.98     | 1   | 5,2   |
| 46907579 | hypothetical protein LMO2365_1370 [Listeria monocytogenes str. 4b F2365]                                   | 0.01      | 0.01       | 2.208    | 1   | 0        | 0   | 5,2   |
| 46907580 | peptidase, M24 family [Listeria monocytogenes str. 4b F2365]                                               | 0.01      | 0.01       | 1.859    | 1   | 3.195    | 1   | 2,2   |
| 46907581 | elongation factor P [Listeria monocytogenes str. 4b F2365]                                                 | 0.0001    | 0.0001     | 7.612    | 2   | 7.513    | 2   | 3,7,4 |
| 46907586 | methylcyclohexanone dehydrogenase/methylcyclohexanone dehydrogenase [Listeria monocytogenes str. 4b F2365] | 1E-14     | 1E-12      | 20.904   | 5   | 26.548   | 6   | 1,8   |
| 46907587 | exodeoxyribonuclease VII, large subunit [Listeria monocytogenes str. 4b F2365]                             | 0.0000001 | 0.0001     | 7.972    | 4   | 3.417    | 2   | 7     |
| 46907591 | 1-deoxy-D-xylulose 5-phosphate synthase [Listeria monocytogenes str. 4b F2365]                             | 0.0001    | 0.0000001  | 3.422    | 2   | 7.321    | 4   | 7     |
| 46907596 | butyrate kinase [Listeria monocytogenes str. 4b F2365]                                                     | 0.0001    | 0.0001     | 3.75     | 2   | 0        | 0   | 2,2   |
| 46907597 | dividylsuccinate dehydrogenase [Listeria monocytogenes str. 4b F2365]                                      | 0.0001    | 1E-16      | 14.199   | 5   | 3.352    | 4   | 2,4   |
| 46907598 | 2-oxoisovalerate dehydrogenase E1 component, alpha subunit [Listeria monocytogenes str. 4b F2365]          | 0.0001    | 0.0001     | 4.483    | 2   | 3.116    | 2   | 2,4   |
| 46907602 | peptidase, M20/M25/M40 family [Listeria monocytogenes str. 4b F2365]                                       | 0.01      | 0.01       | 2.428    | 1   | 0        | 0   | 2     |
| 46907605 | DNA-binding response regulator [Listeria monocytogenes str. 4b F2365]                                      | 0.0001    | 0.01       | 3.139    | 2   | 2        | 1   | 3,5,2 |
| 46907606 | sensor histidine kinase [Listeria monocytogenes str. 4b F2365]                                             | 0.0000001 | 0.000001   | 6.624    | 4   | 6.881    | 4   | 1,3   |
| 46907607 | OxaA-like protein precursor [Listeria monocytogenes str. 4b F2365]                                         | 0.0001    | 1E-18      | 9.308    | 1   | 22.349   | 9   | 1,7   |
| 46907608 | hypothetical protein LMO2365_1399 [Listeria monocytogenes str. 4b F2365]                                   | 0.01      | 0.0001     | 1.532    | 1   | 2.851    | 2   | 6     |
| 46907611 | isopentenyl pyrophosphate isomerase [Listeria monocytogenes str. 4b F2365]                                 | 0.0001    | 0.01       | 4.056    | 2   | 1.403    | 1   | 7     |
| 46907613 | hypothetical protein LMO2365_1404 [Listeria monocytogenes str. 4b F2365]                                   | 1E-10     | 0.0000001  | 11.929   | 5   | 10.239   | 4   | 5,2   |
| 46907614 | FtsK/SpolIIE family protein [Listeria monocytogenes str. 4b F2365]                                         | 0.01      | 0.0001     | 1.614    | 1   | 0        | 0   | 3,7   |
| 46907615 | pyrroline-5-carboxylate reductase [Listeria monocytogenes str. 4b F2365]                                   | 0.0001    | 0.000001   | 3.269    | 2   | 5.981    | 3   | 2,2   |
| 46907617 | ABC transporter, ATP-binding protein [Listeria monocytogenes str. 4b F2365]                                | 0.01      | 0.0000001  | 2.321    | 1   | 7.275    | 4   | 1,2   |
| 46907620 | hypothetical protein LMO2365_1411 [Listeria monocytogenes str. 4b F2365]                                   | 0.01      | 0.01       | 1.38     | 1   | 1.557    | 1   | 1     |
| 46907623 | hypothetical protein LMO2365_1414 [Listeria monocytogenes str. 4b F2365]                                   | 0.0000001 | 0.000001   | 4.276    | 4   | 2.28     | 2   | 5,2   |
| 46907632 | DNA mismatch repair protein [Listeria monocytogenes str. 4b F2365]                                         | 0.0001    | 1E-10      | 4.212    | 2   | 9.431    | 5   | 3,2   |
| 46907633 | glycerol uptake operon antiterminal regulatory protein [Listeria monocytogenes str. 4b F2365]              | 0.000001  | 0.0001     | 4.952    | 3   | 3.135    | 2   | 3,5,2 |
| 46907634 | formate acetyltransferase [Listeria monocytogenes str. 4b F2365]                                           | 1E-10     | 1E-22      | 10.534   | 5   | 22.918   | 11  | 2,1,1 |
| 46907636 | transcriptional regulator, PabK family [Listeria monocytogenes str. 4b F2365]                              | 0.0001    | 0.01       | 1.78     | 1   | 1.78     | 1   | 5,2   |
| 46907637 | major facilitator family transporter [Listeria monocytogenes str. 4b F2365]                                | 0.0001    | 0.0001     | 4.269    | 2   | 0        | 0   | 1,2   |
| 46907641 | cell wall surface anchor family protein [Listeria monocytogenes str. 4b F2365]                             | 0.0001    | 0.000001   | 2.837    | 2   | 6.28     | 3   | 1,8   |
| 46907646 | type I phosphodiesterase/nucleotide pyrophosphatase family protein [Listeria monocytogenes str. 4b F2365]  | 0.01      | 0.0001     | 2.151    | 1   | 3.783    | 2   | 2,6   |
| 46907647 | hypothetical protein LMO2365_1438 [Listeria monocytogenes str. 4b F2365]                                   | 0.0001    | 0.0001     | 1.786    | 1   | 7.06     | 3   | 5,2   |
| 46907649 | glycine betaine-L-proline ABC transporter, ATP-binding protein [Listeria monocytogenes str. 4b F2365]      | 1E-24     | 1E-32      | 30.076   | 12  | 39.396   | 16  | 7     |
| 46907659 | ABC transporter, ATP-binding protein [Listeria monocytogenes str. 4b F2365]                                | 0.01      | 0.01       | 1.722    | 1   | 1.957    | 1   | 1,2   |
| 46907661 | pyridine nucleotide-disulfide oxidoreductase family protein [Listeria monocytogenes str. 4b F2365]         | 1E-10     | 1E-16      | 8.938    | 5   | 13.949   | 8   | 4,1   |
| 46907663 | dividylsuccinate synthase [Listeria monocytogenes str. 4b F2365]                                           | 0.0000001 | 1E-16      | 14.199   | 5   | 14.488   | 8   | 5,2   |
| 46907665 | aspartate-semialdehyde dehydrogenase [Listeria monocytogenes str. 4b F2365]                                | 0.01      | 0.000001   | 1.805    | 1   | 5.234    | 3   | 2,2   |
| 46907667 | superoxide dismutase, Mn [Listeria monocytogenes str. 4b F2365]                                            | 0         | 0          | 1010.933 | 248 | 1028.041 | 241 | 4,2   |
| 46907669 | 4-hydroxy-3-methylbut-2-en-1-yl diphosphate synthase [Listeria monocytogenes str. 4b F2365]                | 0.0001    | 1E-10      | 4.466    | 2   | 10.041   | 5   | 7     |
| 46907670 | AAC family protein [Listeria monocytogenes str. 4b F2365]                                                  | 0.0001    | 0.000001   | 3.782    | 2   | 4.844    | 3   | 1,2   |
| 46907671 | transcriptional regulator ZurR [Listeria monocytogenes str. 4b F2365]                                      | 0.01      | 0.01       | 1.188    | 1   | 0        | 0   | 3,5,2 |
| 46907680 | conserved hypothetical protein TIGR00486 [Listeria monocytogenes str. 4b F2365]                            | 0.01      | 0.01       | 2.515    | 1   | 0        | 0   | 5,2   |
| 46907682 | RNA polymerase sigma factor [Listeria monocytogenes str. 4b F2365]                                         | 0.0001    | 0.0001     | 3.051    | 2   | 0        | 0   | 3,5,1 |
| 46907683 | DNA primase [Listeria monocytogenes str. 4b F2365]                                                         | 0.000001  | 1E-10      | 6.738    | 3   | 9.549    | 5   | 3,1   |
| 46907685 | hypothetical protein LMO2365_1476 [Listeria monocytogenes str. 4b F2365]                                   | 0.0001    | 0.01       | 1.203    | 1   | 0        | 0   | 3,5,2 |
| 46907686 | glycyl-tRNA synthetase, beta subunit [Listeria monocytogenes str. 4b F2365]                                | 0.01      | 0.01       | 1.66     | 1   | 2.12     | 1   | 3,7,2 |
| 46907688 | DNA repair protein RecO [Listeria monocytogenes str. 4b F2365]                                             | 0.01      | 0.000001   | 1.863    | 1   | 5.067    | 3   | 3,3   |
| 46907690 | GTP-binding protein Era [Listeria monocytogenes str. 4b F2365]                                             | 0.01      | 0.01       | 1.658    | 1   | 0        | 0   | 3,7,4 |
| 46907694 | HOG1 domain protein [Listeria monocytogenes str. 4b F2365]                                                 | 0.01      | 0.000001   | 1.501    | 1   | 4.673    | 4   | 7     |
| 46907695 | PhoI family protein [Listeria monocytogenes str. 4b F2365]                                                 | 1E-14     | 1E-14      | 13.087   | 7   | 12.861   | 7   | 2,6   |
| 46907696 | GatB/Veg domain protein [Listeria monocytogenes str. 4b F2365]                                             | 1E-28     | 1E-20      | 42.022   | 14  | 35.272   | 10  | 3,7,2 |
| 46907700 | chaperone protein DnaJ [Listeria monocytogenes str. 4b F2365]                                              | 1E-22     | 1E-18      | 36.783   | 11  | 30.028   | 9   | 4,1   |
| 46907706 | transcriptional regulator, PabK family [Listeria monocytogenes str. 4b F2365]                              | 0.01      | 0.01       | 1.998    | 1   | 1.763    | 1   | 3,5,2 |
| 46907707 | GTP-binding protein LepA [Listeria monocytogenes str. 4b F2365]                                            | 1E-12     | 0.0000001  | 12.593   | 6   | 8.74     | 4   | 3,7,4 |
| 46907708 | ribosomal protein S20 [Listeria monocytogenes str. 4b F2365]                                               | 1E-14     | 1E-10      | 26.769   | 7   | 19.346   | 5   | 3,7,1 |
| 46907710 | conflC/Rec2 family protein [Listeria monocytogenes str. 4b F2365]                                          | 0.0001    | 1E-12      | 3.714    | 2   | 9.755    | 6   | 1,1   |
| 46907712 | DNA-binding protein, ConrA family [Listeria monocytogenes str. 4b F2365]                                   | 0.01      | 0.01       | 1.934    | 1   | 0        | 0   | 1,1   |
| 46907715 | conserved hypothetical protein TIGR00488 [Listeria monocytogenes str. 4b F2365]                            | 0.0001    | 0.000001   | 3.286    | 2   | 5.297    | 3   | 5,2   |
| 46907718 | shikimate 5-dehydrogenase [Listeria monocytogenes str. 4b F2365]                                           | 0.01      | 0.01       | 1.42     | 1   | 0        | 0   | 2,2   |
| 46907719 | GTPase, putative [Listeria monocytogenes str. 4b F2365]                                                    | 0.01      | 0.01       | 1.424    | 1   | 2.015    | 1   | 4,5   |
| 46907720 | hypothetical protein LMO2365_1511 [Listeria monocytogenes str. 4b F2365]                                   | 0.0001    | 0.01       | 1.548    | 1   | 0        | 0   | 5,2   |
| 46907722 | peptidase, M3 family [Listeria monocytogenes str. 4b F2365]                                                | 0.01      | 0.01       | 1.474    | 1   | 1.843    | 1   | 2,2   |
| 46907723 | hypothetical protein LMO2365_1514 [Listeria monocytogenes str. 4b F2365]                                   | 0.0001    | 0.0001     | 5.719    | 2   | 0        | 0   | 5,2   |
| 46907725 | uridine kinase [Listeria monocytogenes str. 4b F2365]                                                      | 0.01      | 0.01       | 1.683    | 1   | 0        | 0   | 2,3   |
| 46907727 | conserved hypothetical protein TIGR00247 [Listeria monocytogenes str. 4b F2365]                            | 0.0001    | 0.000001   | 7.848    | 2   | 11.561   | 3   | 2,2   |
| 46907731 | hypothetical protein LMO2365_1522 [Listeria monocytogenes str. 4b F2365]                                   | 0.0001    | 0.0001     | 1.732    | 1   | 4.616    | 2   | 5,2   |
| 46907732 | alanyl-tRNA synthetase [Listeria monocytogenes                                                             |           |            |          |     |          |     |       |

|          |                                                                                                                                       |            |            |         |    |         |    |       |
|----------|---------------------------------------------------------------------------------------------------------------------------------------|------------|------------|---------|----|---------|----|-------|
| 46007847 | phosphotransferase enzyme family protein [Listeria monocytogenes str. 4b F2365]                                                       | 0.01       |            | 2.004   | 1  | 0       | 0  | 5.2   |
| 46007848 | transcriptional regulator, MarR family [Listeria monocytogenes str. 4b F2365]                                                         | 0.01       |            | 2.583   | 1  | 0       | 0  | 3.52  |
| 46007849 | D-amino acid aminotransferase [Listeria monocytogenes str. 4b F2365]                                                                  | 0.00001    | 0.00001    | 3.855   | 1  | 0       | 0  | 2.2   |
| 46007852 | hypothetical protein LMOQ2365_1644 [Listeria monocytogenes str. 4b F2365]                                                             | 0.01       | 0.00000001 | 1.861   | 1  | 7.531   | 4  | 5.2   |
| 46007858 | tryptophan synthase subunit beta [Listeria monocytogenes str. 4b F2365]                                                               | 0.00000001 | 0.0001     | 7.13    | 4  | 3.963   | 2  | 2.2   |
| 46007861 | anthranilate phosphoribosyltransferase [Listeria monocytogenes str. 4b F2365]                                                         | 0.000001   | 0.000001   | 5.086   | 3  | 4.441   | 3  | 2.2   |
| 46007862 | anthranilate synthase component I [Listeria monocytogenes str. 4b F2365]                                                              | 0.01       | 0.01       | 2.725   | 1  | 1.725   | 1  | 2.2   |
| 46007863 | anthranilate synthase component II [Listeria monocytogenes str. 4b F2365]                                                             | 1E-14      | 1E-18      | 12.83   | 7  | 17.627  | 9  | 2.2   |
| 46007864 | aldehyde-alcohol dehydrogenase [Listeria monocytogenes str. 4b F2365]                                                                 | 1E-16      | 1E-14      | 13.226  | 8  | 11.616  | 7  | 2.11  |
| 46007866 | ABC transporter, ATP-binding protein [Listeria monocytogenes str. 4b F2365]                                                           | 0.0001     | 0.000001   | 3.367   | 2  | 5.8     | 3  | 1.2   |
| 46007867 | ABC transporter, permease protein, putative [Listeria monocytogenes str. 4b F2365]                                                    | 0.01       | 0.000001   | 1.802   | 1  | 8.697   | 3  | 1.2   |
| 46007868 | hypothetical protein LMOQ2365_1660 [Listeria monocytogenes str. 4b F2365]                                                             | 0.000001   | 0.00000001 | 7.371   | 3  | 9.022   | 4  | 2.2   |
| 46007870 | acetate hydratase [Listeria monocytogenes str. 4b F2365]                                                                              | 1E-22      | 1E-18      | 20.155  | 11 | 18.408  | 9  | 2.13  |
| 46007871 | STAS domain protein [Listeria monocytogenes str. 4b F2365]                                                                            | 0.01       | 0.01       | 1.657   | 1  | 1.334   | 1  | 3.52  |
| 46007872 | hypothetical protein LMOQ2365_1664 [Listeria monocytogenes str. 4b F2365]                                                             | 1E-10      | 1E-16      | 17.092  | 5  | 27.509  | 8  | 6     |
| 46007873 | ecmoclase ShcD, putative [Listeria monocytogenes str. 4b F2365]                                                                       | 0.01       | 0.01       | 1.549   | 1  | 1.549   | 1  | 3.3   |
| 46007876 | 1-acetylcoA-3-phosphate O-acetyltransferase domain protein [Listeria monocytogenes str. 4b F2365]                                     | 0.000001   | 1E-14      | 6.085   | 3  | 13.499  | 7  | 2.4   |
| 46007877 | hypothetical protein LMOQ2365_1669 [Listeria monocytogenes str. 4b F2365]                                                             | 0.000001   | 1E-12      | 7.003   | 3  | 10.437  | 6  | 5.2   |
| 46007881 | hypothetical protein LMOQ2365_1673 [Listeria monocytogenes str. 4b F2365]                                                             | 0.01       | 0.0001     | 1.727   | 1  | 2.681   | 2  | 6     |
| 46007882 | hypothetical protein LMOQ2365_1674 [Listeria monocytogenes str. 4b F2365]                                                             | 0.01       | 0.1        | 1.767   | 1  | 1.767   | 1  | 1.2   |
| 46007887 | 30S ribosomal protein S2 [Listeria monocytogenes str. 4b F2365]                                                                       | 0.01       | 0.0001     | 1.469   | 1  | 2.761   | 2  | 3.71  |
| 46007894 | asparagine synthase [glutamine-hydrolyzing] [Listeria monocytogenes str. 4b F2365]                                                    | 1E-16      | 1E-20      | 15.89   | 8  | 18.772  | 10 | 3.72  |
| 46007897 | hypothetical protein LMOQ2365_1690 [Listeria monocytogenes str. 4b F2365]                                                             | 1E-10      | 1E-16      | 9.174   | 5  | 13.596  | 8  | 1.8   |
| 46007902 | laminin-binding surface protein, putative [Listeria monocytogenes str. 4b F2365]                                                      | 0.01       | 0.0001     | 2.803   | 1  | 3.458   | 2  | 1.2   |
| 46007904 | naphtholate synthase [Listeria monocytogenes str. 4b F2365]                                                                           | 0.000001   | 0.0001     | 4.775   | 3  | 3.112   | 2  | 2.5   |
| 46007908 | 1,4-dihydroxy-2-naphthoate octaprenyltransferase, [Listeria monocytogenes str. 4b F2365]                                              | 0.01       | 0.01       | 1.439   | 1  | 1.383   | 1  | 2.5   |
| 46007909 | bifunctional homocysteine S-methyltransferase/5,10-methylenetetrahydrofolate reductase protein [Listeria monocytogenes str. 4b F2365] | 0.0001     | 0.000001   | 2.845   | 2  | 5.712   | 3  | 2.2   |
| 46007910 | cystathionine beta-lyase [Listeria monocytogenes str. 4b F2365]                                                                       | 0.0001     | 0.0001     | 3.021   | 2  | 3.021   | 2  | 2.2   |
| 46007914 | peroxide operon transcriptional regulator [Listeria monocytogenes str. 4b F2365]                                                      | 0.01       | 0.01       | 2.029   | 1  | 1.574   | 1  | 3.52  |
| 46007916 | glutamate-1-semialdehyde aminotransferase [Listeria monocytogenes str. 4b F2365]                                                      | 0.01       | 0.01       | 2.277   | 1  | 0       | 0  | 2.5   |
| 46007917 | hypothetical protein LMOQ2365_1710 [Listeria monocytogenes str. 4b F2365]                                                             | 0.0001     | 0.0001     | 4.145   | 2  | 3.518   | 2  | 5.2   |
| 46007918 | hypothetical protein LMOQ2365_1711 [Listeria monocytogenes str. 4b F2365]                                                             | 0.01       | 0.01       | 3.246   | 1  | 3.446   | 1  | 5.2   |
| 46007919 | enoyl-(acyl carrier protein) reductase [Listeria monocytogenes str. 4b F2365]                                                         | 0.01       | 0.0001     | 1.478   | 1  | 4.697   | 2  | 2.11  |
| 46007923 | hypothetical protein LMOQ2365_1716 [Listeria monocytogenes str. 4b F2365]                                                             | 0.000001   | 0.000001   | 10.596  | 3  | 10.296  | 3  | 5.2   |
| 46007929 | acetyltransferase, GNAT family [Listeria monocytogenes str. 4b F2365]                                                                 | 0.01       | 0.0001     | 3.81    | 1  | 0       | 0  | 3.8   |
| 46007930 | methyl-accepting chemotaxis protein [Listeria monocytogenes str. 4b F2365]                                                            | 0.0001     | 0.0001     | 2.03    | 2  | 4.059   | 5  | 2     |
| 46007936 | deoxymucolase kinase family protein [Listeria monocytogenes str. 4b F2365]                                                            | 0.000001   | 1E-10      | 7.966   | 3  | 9.014   | 2  | 5.2   |
| 46007940 | methionine aminopeptidase [Listeria monocytogenes str. 4b F2365]                                                                      | 0.00000001 | 0.0001     | 7.301   | 4  | 2.893   | 2  | 3.8   |
| 46007951 | PTS system, beta-glucoside-specific, IIB component [Listeria monocytogenes str. 4b F2365]                                             | 0.0001     | 0.0001     | 3.688   | 2  | 2.966   | 2  | 1.2   |
| 46007953 | hypothetical protein LMOQ2365_1747 [Listeria monocytogenes str. 4b F2365]                                                             | 0.01       | 0.01       | 1.952   | 1  | 1.813   | 1  | 6     |
| 46007957 | transcriptional regulator, LacI family [Listeria monocytogenes str. 4b F2365]                                                         | 1E-16      | 1E-16      | 17.489  | 9  | 14.827  | 10 | 2.12  |
| 46007958 | hypothetical protein LMOQ2365_1752 [Listeria monocytogenes str. 4b F2365]                                                             | 0.00000001 | 1E-10      | 6.705   | 4  | 8.894   | 5  | 3.52  |
| 46007959 | beta-glucosidase [Listeria monocytogenes str. 4b F2365]                                                                               | 0.000001   | 0.000001   | 5.799   | 3  | 5.115   | 3  | 2.11  |
| 46007960 | ABC transporter, substrate-binding protein [Listeria monocytogenes str. 4b F2365]                                                     | 1E-12      | 1E-10      | 16.918  | 6  | 15.062  | 5  | 1.2   |
| 46007962 | ABC transporter, permease protein [Listeria monocytogenes str. 4b F2365]                                                              | 0.01       | 0.01       | 2.221   | 1  | 2.184   | 1  | 1.2   |
| 46007964 | glutamate synthase, large subunit [Listeria monocytogenes str. 4b F2365]                                                              | 1E-10      | 1E-12      | 7.712   | 5  | 9.318   | 6  | 2.2   |
| 46007965 | transcriptional regulator GBC [Listeria monocytogenes str. 4b F2365]                                                                  | 0.0001     | 0.000001   | 3.092   | 2  | 4.206   | 3  | 3.52  |
| 46007968 | amino acid ABC transporter, amino acid-binding protein [Listeria monocytogenes str. 4b F2365]                                         | 0.01       | 0.00000001 | 1.652   | 1  | 10.278  | 4  | 1.2   |
| 46007969 | amino acid ABC transporter, ATP-binding protein [Listeria monocytogenes str. 4b F2365]                                                | 0.0001     | 0.01       | 5.146   | 2  | 0       | 0  | 1.2   |
| 46007971 | sensor histidine kinase [Listeria monocytogenes str. 4b F2365]                                                                        | 0.0001     | 1E-14      | 3.992   | 2  | 13.488  | 7  | 1.3   |
| 46007975 | DNA-binding response regulator [Listeria monocytogenes str. 4b F2365]                                                                 | 0.0001     | 0.0001     | 3.799   | 2  | 3.691   | 2  | 3.52  |
| 46007976 | ABC transporter, permease protein [Listeria monocytogenes str. 4b F2365]                                                              | 0.01       | 0.01       | 1.566   | 1  | 1.356   | 1  | 1.2   |
| 46007978 | hypothetical protein LMOQ2365_1773 [Listeria monocytogenes str. 4b F2365]                                                             | 0.01       | 0.000001   | 2.731   | 1  | 6.106   | 3  | 1.6   |
| 46007979 | shikimate kinase [Listeria monocytogenes str. 4b F2365]                                                                               | 0.01       | 0.01       | 1.702   | 1  | 0       | 0  | 2.2   |
| 46007980 | hypothetical protein LMOQ2365_1775 [Listeria monocytogenes str. 4b F2365]                                                             | 0.01       | 0.01       | 1.582   | 1  | 0       | 0  | 5.2   |
| 46007982 | hypothetical protein LMOQ2365_1777 [Listeria monocytogenes str. 4b F2365]                                                             | 0.01       | 0.000001   | 1.561   | 1  | 5.659   | 3  | 6     |
| 46007983 | conserved hypothetical protein TIGR00147 [Listeria monocytogenes str. 4b F2365]                                                       | 0.0001     | 0.0001     | 2.869   | 2  | 1.869   | 2  | 5.2   |
| 46007984 | aspartyl-glutamyl-tRNA synthetase subunit B [Listeria monocytogenes str. 4b F2365]                                                    | 0.01       | 0.0001     | 1.584   | 1  | 3.771   | 2  | 3.72  |
| 46007986 | glutamyl-tRNA(Gln) amidotransferase, C subunit [Listeria monocytogenes str. 4b F2365]                                                 | 0.01       | 0.01       | 4.878   | 1  | 5.854   | 1  | 3.72  |
| 46007990 | PorB-like protein [Listeria monocytogenes str. 4b F2365]                                                                              | 0.01       | 0.01       | 1.464   | 1  | 0       | 0  | 1.1   |
| 46007991 | sodium neurotransmitter symporter family protein [Listeria monocytogenes str. 4b F2365]                                               | 0.01       | 0.01       | 1.711   | 1  | 0       | 0  | 3.2   |
| 46007995 | phosphoribosylformylglycinamidine synthase [Listeria monocytogenes str. 4b F2365]                                                     | 1E-10      | 1E-12      | 9.966   | 1  | 10.52   | 2  | 2.2   |
| 46008001 | phosphoribosylformylglycinamidine synthase [Listeria monocytogenes str. 4b F2365]                                                     | 0.01       | 0.0001     | 1.629   | 1  | 3.208   | 2  | 2.3   |
| 46008003 | adenylsuccinate lyase [Listeria monocytogenes str. 4b F2365]                                                                          | 0.0001     | 1E-10      | 3.03    | 2  | 8.741   | 5  | 2.3   |
| 46008004 | phosphoribosylamidoimidazole carboxylase, ATPase subunit [Listeria monocytogenes str. 4b F2365]                                       | 0.0001     | 0.01       | 3.256   | 2  | 2.212   | 1  | 2.3   |
| 46008008 | ABC transporter, ATP-binding protein [Listeria monocytogenes str. 4b F2365]                                                           | 0.0001     | 0.000001   | 3.001   | 2  | 5.362   | 3  | 1.2   |
| 46008009 | hypothetical protein LMOQ2365_1804 [Listeria monocytogenes str. 4b F2365]                                                             | 0.0001     | 0.0001     | 3.861   | 2  | 2.975   | 2  | 6     |
| 46008014 | 50S ribosomal protein L35 [Listeria monocytogenes str. 4b F2365]                                                                      | 0.0001     | 0.0001     | 7.597   | 2  | 4.648   | 2  | 3.71  |
| 46008015 | translation initiation factor IF-3 [Listeria monocytogenes str. 4b F2365]                                                             | 1E-28      | 1E-30      | 45.681  | 14 | 45.251  | 15 | 3.73  |
| 46008017 | intendin family protein [Listeria monocytogenes str. 4b F2365]                                                                        | 0.01       | 0.01       | 2.295   | 1  | 2.295   | 1  | 4.4   |
| 46008020 | transcriptional regulator, MeoR family [Listeria monocytogenes str. 4b F2365]                                                         | 0.00000001 | 0.000001   | 6.052   | 4  | 7.754   | 3  | 4.4   |
| 46008022 | methyl-beta-lactamase family protein [Listeria monocytogenes str. 4b F2365]                                                           | 0.01       | 0.01       | 1.476   | 1  | 0       | 0  | 5.2   |
| 46008024 | tRNA (guanine-N1)-methyltransferase [Listeria monocytogenes str. 4b F2365]                                                            | 1E-12      | 1E-14      | 12.588  | 6  | 14.893  | 7  | 3.6   |
| 46008025 | 16S rRNA processing protein RimM [Listeria monocytogenes str. 4b F2365]                                                               | 0.0001     | 0.0001     | 1.477   | 1  | 5.085   | 3  | 5.2   |
| 46008029 | ribosomal protein S16 [Listeria monocytogenes str. 4b F2365]                                                                          | 1E-16      | 1E-12      | 27.143  | 8  | 18.731  | 6  | 3.71  |
| 46008030 | hypothetical protein LMOQ2365_1825 [Listeria monocytogenes str. 4b F2365]                                                             | 0.01       | 0.01       | 1.822   | 1  | 1.445   | 1  | 5.2   |
| 46008031 | protein-tyrosine phosphatase, putative [Listeria monocytogenes str. 4b F2365]                                                         | 0.00000001 | 1E-10      | 9.49    | 4  | 11.217  | 5  | 3.8   |
| 46008034 | cell division ABC transporter, substrate-binding protein FtsY [Listeria monocytogenes str. 4b F2365]                                  | 0.000001   | 0.000001   | 6.576   | 4  | 6.556   | 4  | 3.6   |
| 46008035 | chromosome segregation SMC protein [Listeria monocytogenes str. 4b F2365]                                                             | 1E-10      | 1E-22      | 9.029   | 11 | 23.301  | 11 | 3.4   |
| 46008036 | ribonuclease III [Listeria monocytogenes str. 4b F2365]                                                                               | 0.0001     | 0.0001     | 3.727   | 2  | 0       | 0  | 2.3   |
| 46008038 | acyl carrier protein [Listeria monocytogenes str. 4b F2365]                                                                           | 0.01       | 0.01       | 1.79    | 1  | 2.127   | 1  | 2.4   |
| 46008039 | 3-oxoacyl-(acyl-carrier protein) reductase [Listeria monocytogenes str. 4b F2365]                                                     | 0.0001     | 0.0001     | 2.928   | 2  | 2.928   | 2  | 2.4   |
| 46008040 | acyl-carrier-protein S-malonyltransferase [Listeria monocytogenes str. 4b F2365]                                                      | 0.01       | 0.00000001 | 4.036   | 1  | 14.58   | 4  | 2.4   |
| 46008043 | ATP-dependent DNA helicase RecF [Listeria monocytogenes str. 4b F2365]                                                                | 1E-10      | 1E-10      | 9.012   | 5  | 9.202   | 5  | 3.3   |
| 46008044 | L-serine dehydratase, iron-sulfur-dependent, alpha subunit [Listeria monocytogenes str. 4b F2365]                                     | 0.01       | 0.01       | 1.663   | 1  | 0       | 0  | 2.2   |
| 46008045 | L-serine dehydratase, iron-sulfur-dependent, beta subunit [Listeria monocytogenes str. 4b F2365]                                      | 0.01       | 0.01       | 1.745   | 1  | 0       | 0  | 2.2   |
| 46008052 | protein kinase, putative [Listeria monocytogenes str. 4b F2365]                                                                       | 0.00000001 | 0.00000001 | 7.612   | 1  | 7.612   | 1  | 4.028 |
| 46008053 | serine/threonine protein phosphatase family protein [Listeria monocytogenes str. 4b F2365]                                            | 0.01       | 0.01       | 2.159   | 1  | 2.495   | 1  | 3.8   |
| 46008054 | sun protein [Listeria monocytogenes str. 4b F2365]                                                                                    | 1E-12      | 1E-16      | 14.674  | 6  | 17.791  | 8  | 3.6   |
| 46008055 | methionyl-tRNA formyltransferase [Listeria monocytogenes str. 4b F2365]                                                               | 0.0001     | 0.01       | 3.295   | 2  | 0       | 0  | 3.6   |
| 46008057 | phosphoenolpyruvate decarboxylase [Listeria monocytogenes str. 4b F2365]                                                              | 1E-18      | 1E-10      | 13.377  | 9  | 16.24   | 10 | 5.2   |
| 46008059 | guanylate kinase family protein [Listeria monocytogenes str. 4b F2365]                                                                | 0.00000001 | 1E-20      | 7.336   | 4  | 18.427  | 10 | 7     |
| 46008060 | conserved hypothetical protein TIGR00255 [Listeria monocytogenes str. 4b F2365]                                                       | 0.0001     | 0.0001     | 2.742   | 2  | 0       | 0  | 5.2   |
| 46008061 | fibrinogen binding protein, putative [Listeria monocytogenes str. 4b F2365]                                                           | 0.0001     | 0.0001     | 3.184   | 2  | 0       | 0  | 1.8   |
| 46008062 | short chain dehydrogenase [Listeria monocytogenes str. 4b F2365]                                                                      | 0.000001   | 0.01       | 1.095   | 1  | 1.359   | 1  | 5.2   |
| 46008063 | orotate phosphoribosyltransferase [Listeria monocytogenes str. 4b F2365]                                                              | 0.01       | 0.0001     | 1.602   | 1  | 2.796   | 2  | 2.3   |
| 46008065 | dihydroorotate dehydrogenase [Listeria monocytogenes str. 4b F2365]                                                                   | 0.01       | 0.01       | 1.878   | 1  | 1.931   | 1  | 2.3   |
| 46008066 | dihydroorotate dehydrogenase, electron transfer subunit [Listeria monocytogenes str. 4b F2365]                                        | 0.000001   | 0.000001   | 5.271   | 3  | 5.014   | 3  | 2.3   |
| 46008068 | carbamoyl-phosphate synthase small subunit [Listeria monocytogenes str. 4b F2365]                                                     | 0.01       | 0.01       | 1.902   | 1  | 5.41    | 3  | 2.3   |
| 46008069 | dihydroorotate [Listeria monocytogenes str. 4b F2365]                                                                                 | 0.00000001 | 0.00000001 | 6.612   | 4  | 5.981   | 4  | 2.3   |
| 46008070 | aspartate carbamoyltransferase catalytic subunit [Listeria monocytogenes str. 4b F2365]                                               | 0.0001     | 0.0001     | 4.405   | 2  | 0       | 0  | 2.3   |
| 46008072 | pyrimidine regulatory protein PyrR [Listeria monocytogenes str. 4b F2365]                                                             | 0.01       | 0.0001     | 2.261   | 1  | 4.493   | 2  | 3.52  |
| 46008073 | ribosomal large subunit pseudouridine synthase, R14d subfamily [Listeria monocytogenes str. 4b F2365]                                 | 0.0001     | 0.01       | 1.809   | 1  | 1.809   | 1  | 5.2   |
| 46008079 | ABC transporter, manganese-binding protein [Listeria monocytogenes str. 4b F2365]                                                     | 1E-128     | 1E-132     | 259.504 | 64 | 237.514 | 66 | 7     |
| 46008081 | manganese ABC transporter, ATP-binding protein [Listeria monocytogenes str. 4b F2365]                                                 | 1E-12      | 0.01       | 9.518   | 6  | 1.812   | 1  | 7     |
| 46008082 | transcriptional regulator, MarR family [Listeria monocytogenes str. 4b F2365]                                                         | 0.01       | 0.0001     | 2.059   | 1  | 2.975   | 2  | 3.52  |
| 46008083 | carboxypeptidase family protein [Listeria monocytogenes str. 4b F2365]                                                                | 0.00000001 | 1E-20      | 9.105   | 4  | 9.444   | 3  | 2.5   |
| 46008084 | heavy metal-binding protein [Listeria monocytogenes str. 4b F2365]                                                                    | 0.00000001 | 0.01       | 10.019  | 1  | 1.725   | 1  | 1.2   |
| 46008085 | copper-translocating P-type ATPase [Listeria monocytogenes str. 4b F2365]                                                             | 1E-14      | 0.00000001 | 13.388  | 7  | 7.136   | 4  | 1.2   |
| 46008086 | hypothetical protein LMOQ2365_1882 [Listeria monocytogenes str. 4b F2365]                                                             | 0.01       | 0.01       | 4.145   | 1  | 2.756   | 1  | 5.2   |
| 46008088 | purine nucleoside phosphorylase [Listeria monocytogenes str. 4b F2365]                                                                | 0.01       | 0.000001   | 1.492   | 1  | 4.524   | 3  | 2.3   |
| 46008091 | methionine                                                                                                                            |            |            |         |    |         |    |       |

|          |                                                                                                                   |           |           |        |   |        |     |       |
|----------|-------------------------------------------------------------------------------------------------------------------|-----------|-----------|--------|---|--------|-----|-------|
| 46080201 | tellurite resistance protein, putative [Listeria monocytogenes str. 4b F2365]                                     | 0.0001    | 0.000001  | 4.082  | 2 | 7.518  | 3   | 4.2   |
| 46080203 | oxidoreductase, short-chain dehydrogenase/reductase family [Listeria monocytogenes str. 4b F2365]                 | 0.0001    | 0.0001    | 3.179  | 2 | 3.028  | 2   | 2.1.1 |
| 46080204 | metal-beta-actin family protein [Listeria monocytogenes str. 4b F2365]                                            | 0.01      | 0.000001  | 1.432  | 1 | 1.432  | 7   |       |
| 46080206 | glucose-6-phosphate 1-dehydrogenase [Listeria monocytogenes str. 4b F2365]                                        | 0.0001    | 0.01      | 3.538  | 2 | 2.115  | 1   | 2.1.1 |
| 46080208 | hypothetical protein LMO2365_2004 [Listeria monocytogenes str. 4b F2365]                                          | 0.0001    | 1E-10     | 3.426  | 2 | 9.939  | 5   | 5.2   |
| 46080211 | acetylacetate synthase, large subunit, biosynthetic type [Listeria monocytogenes str. 4b F2365]                   | 0.01      | 0.01      | 2.747  | 1 | 0      | 0   | 2.2   |
| 46080214 | 2-isopropylmalate synthase [Listeria monocytogenes str. 4b F2365]                                                 | 0.01      | 0.0001    | 1.302  | 1 | 3.262  | 4   | 2.2   |
| 46080216 | isopropylmalate isomerase, large subunit [Listeria monocytogenes str. 4b F2365]                                   | 0.01      | 0.0000001 | 1.716  | 1 | 8.167  | 4   | 2.2   |
| 46080218 | threonine dehydratase [Listeria monocytogenes str. 4b F2365]                                                      | 0.01      | 0.01      | 1.411  | 1 | 2.352  | 1   | 2.2   |
| 46080220 | pyrimidine-nucleoside phosphorylase [Listeria monocytogenes str. 4b F2365]                                        | 0.0000001 | 0.000001  | 7.118  | 4 | 5.969  | 3   | 2.3   |
| 46080224 | PTS system, mannose/fructose/xorbose family, IIA component [Listeria monocytogenes str. 4b F2365]                 | 0.0001    | 0.0001    | 3.631  | 2 | 0      | 0   | 2.2   |
| 46080226 | SIS domain protein [Listeria monocytogenes str. 4b F2365]                                                         | 0.01      | 0.000001  | 1.382  | 1 | 5.701  | 3   | 2.1.1 |
| 46080227 | PTS system, mannose/fructose/xorbose family, IIB component [Listeria monocytogenes str. 4b F2365]                 | 0.0001    | 0.01      | 3.991  | 2 | 1.879  | 1   | 1.2   |
| 46080229 | PTS system, mannose/fructose/xorbose family, IIB component [Listeria monocytogenes str. 4b F2365]                 | 0.0000001 | 0.0000001 | 9.886  | 4 | 6.694  | 4   | 1.2   |
| 46080231 | transcriptional regulator, GntR family [Listeria monocytogenes str. 4b F2365]                                     | 0.01      | 0.0001    | 1.722  | 1 | 3.405  | 2   | 3.5.2 |
| 46080234 | alpha-acetylacetate synthase [Listeria monocytogenes str. 4b F2365]                                               | 0.0001    | 0.0001    | 1.241  | 1 | 1.141  | 1   | 2.1.1 |
| 46080238 | DNA-binding response regulator [Listeria monocytogenes str. 4b F2365]                                             | 0.0001    | 1E-14     | 3.772  | 2 | 12.075 | 7   | 3.5.2 |
| 46080239 | sensor histidine kinase [Listeria monocytogenes str. 4b F2365]                                                    | 0.01      | 0.0000001 | 1.549  | 1 | 8.175  | 4   | 1.3   |
| 46080240 | hypothetical protein LMO2365_2036 [Listeria monocytogenes str. 4b F2365]                                          | 0.01      | 0.01      | 1.531  | 1 | 0      | 0   | 2.2   |
| 46080242 | glycyl hydrolase, family 38 [Listeria monocytogenes str. 4b F2365]                                                | 0.01      | 0.0000001 | 1.747  | 1 | 7.435  | 4   | 5.1   |
| 46080244 | alpha-D-mannosidase [Listeria monocytogenes str. 4b F2365]                                                        | 0.0001    | 0.01      | 3.418  | 2 | 2.113  | 1   | 2.1.1 |
| 46080248 | isoleucyl-tRNA synthetase [Listeria monocytogenes str. 4b F2365]                                                  | 0.0000001 | 1E-10     | 19.692 | 4 | 15.98  | 5   | 3.7.2 |
| 46080252 | L-aspartate oxidase [Listeria monocytogenes str. 4b F2365]                                                        | 0.0001    | 0.0001    | 3.652  | 2 | 4.816  | 2   | 2.5   |
| 46080253 | nicotinate-nucleotide pyrophosphorylase [Listeria monocytogenes str. 4b F2365]                                    | 0.01      | 0.01      | 1.7    | 1 | 0      | 0   | 2.5   |
| 46080268 | cell division protein FtsZ [Listeria monocytogenes str. 4b F2365]                                                 | 0.0000001 | 0.0001    | 9.324  | 4 | 3.096  | 2   | 1.7   |
| 46080272 | UDP-N-acetylmuramoyl-L-alanyl-D-glutamate synthetase [Listeria monocytogenes str. 4b F2365]                       | 0.01      | 0.01      | 1.941  | 1 | 1.45   | 1   | 1.1   |
| 46080273 | phospho-N-acetylmuramoyl-pentapeptide-transferase [Listeria monocytogenes str. 4b F2365]                          | 0.01      | 0.01      | 2.545  | 1 | 0      | 0   | 1.1   |
| 46080275 | penicillin-binding protein [Listeria monocytogenes str. 4b F2365]                                                 | 1E-165    | 1E-10     | 9.025  | 5 | 8.575  | 3   | 5.2   |
| 46080277 | S-adenosyl-methyltransferase [Listeria monocytogenes str. 4b F2365]                                               | 0.0001    | 0.01      | 1.401  | 1 | 2.108  | 1   | 1.1   |
| 46080279 | hypothetical protein LMO2365_2075 [Listeria monocytogenes str. 4b F2365]                                          | 0.01      | 0.01      | 1.713  | 1 | 1.457  | 1   | 5.2   |
| 46080280 | bacterial extracellular solute-binding protein, family 5 [Listeria monocytogenes str. 4b F2365]                   | 0.01      | 0.01      | 1.664  | 1 | 0      | 0   | 1.2   |
| 46080287 | maltooligosaccharide adenylyltransferase [Listeria monocytogenes str. 4b F2365]                                   | 0.0000001 | 0.01      | 7.802  | 1 | 2.402  | 1   | 5.2   |
| 46080289 | hypothetical protein LMO2365_2085 [Listeria monocytogenes str. 4b F2365]                                          | 0.000001  | 0.0000001 | 5.656  | 3 | 8.094  | 4   | 5.2   |
| 46080290 | hypothetical protein LMO2365_2086 [Listeria monocytogenes str. 4b F2365]                                          | 0.01      | 0.01      | 2.057  | 1 | 0      | 0   | 5.2   |
| 46080292 | pyrochrome IX farnesyltransferase [Listeria monocytogenes str. 4b F2365]                                          | 1E-16     | 1E-10     | 14.37  | 8 | 7.595  | 5   | 2.5   |
| 46080293 | cytochrome oxidase assembly protein [Listeria monocytogenes str. 4b F2365]                                        | 0.0001    | 0.000001  | 4.335  | 3 | 5.127  | 3   | 2.5   |
| 46080297 | copper resistance domain protein [Listeria monocytogenes str. 4b F2365]                                           | 0.0001    | 0.01      | 1.182  | 1 | 6.249  | 1   | 1.2   |
| 46080308 | redox-sensing transcriptional repressor Rex [Listeria monocytogenes str. 4b F2365]                                | 0.01      | 0.01      | 2.265  | 1 | 1.992  | 1   | 7     |
| 46080314 | conserved hypothetical protein TIGR00150 [Listeria monocytogenes str. 4b F2365]                                   | 0.000001  | 0.0001    | 5.994  | 3 | 3.644  | 2   | 5.2   |
| 46080320 | cell wall surface anchor family protein [Listeria monocytogenes str. 4b F2365]                                    | 0.01      | 0.01      | 2.068  | 1 | 0      | 0   | 1.8   |
| 46080321 | DNA-binding protein [Listeria monocytogenes str. 4b F2365]                                                        | 0.0001    | 0.0001    | 2.537  | 1 | 2.78   | 2   | 3.5.2 |
| 46080323 | transcriptional regulator, TetR family [Listeria monocytogenes str. 4b F2365]                                     | 0.01      | 0.01      | 2.605  | 1 | 0      | 0   | 3.5.2 |
| 46080325 | argininosuccinate synthase [Listeria monocytogenes str. 4b F2365]                                                 | 0.0001    | 1E-10     | 3.212  | 2 | 7.513  | 5   | 2.2   |
| 46080329 | hypothetical protein LMO2365_2126 [Listeria monocytogenes str. 4b F2365]                                          | 0.0001    | 0.000001  | 3.98   | 2 | 5.82   | 2   | 2.1.1 |
| 46080330 | carbohydrate kinase, P4B family [Listeria monocytogenes str. 4b F2365]                                            | 0.0001    | 0.01      | 1.382  | 1 | 6.249  | 1   | 5.2   |
| 46080334 | hypothetical protein LMO2365_2131 [Listeria monocytogenes str. 4b F2365]                                          | 1E-16     | 1E-14     | 19.33  | 8 | 18.934 | 7   | 3.5.2 |
| 46080335 | transcriptional regulator, GntR family/aminotransferase family protein [Listeria monocytogenes str. 4b F2365]     | 0.01      | 0.01      | 1.744  | 1 | 2.143  | 1   | 3.5.2 |
| 46080336 | pyridoxine biosynthesis protein [Listeria monocytogenes str. 4b F2365]                                            | 1E-12     | 1E-24     | 18.777 | 6 | 34.993 | 12  | 7     |
| 46080337 | glutamine amidotransferase, SNO family [Listeria monocytogenes str. 4b F2365]                                     | 0.01      | 0.01      | 2.845  | 1 | 7.415  | 4   | 5.2   |
| 46080344 | N-acetylglucosamine-6-phosphate deacetylase [Listeria monocytogenes str. 4b F2365]                                | 0.0001    | 0.0000001 | 3.239  | 2 | 0      | 0   | 2.1.1 |
| 46080346 | mannose-6-phosphate isomerase, class I [Listeria monocytogenes str. 4b F2365]                                     | 1E-16     | 1E-16     | 20.162 | 8 | 23.835 | 8   | 2.1.1 |
| 46080347 | nitroreductase family protein [Listeria monocytogenes str. 4b F2365]                                              | 0.0001    | 1E-12     | 4.353  | 2 | 13.694 | 6   | 1.4   |
| 46080349 | hypothetical protein LMO2365_2146 [Listeria monocytogenes str. 4b F2365]                                          | 0.0000001 | 1E-14     | 4.353  | 2 | 11.47  | 5   | 5.2   |
| 46080350 | ABC transporter, ATP-binding protein [Listeria monocytogenes str. 4b F2365]                                       | 0.000001  | 0.01      | 3.776  | 2 | 1.941  | 1   | 1.2   |
| 46080357 | glycyl transferase, family 65 [Listeria monocytogenes str. 4b F2365]                                              | 0.01      | 0.0000001 | 1.88   | 1 | 7.349  | 4   | 2.1.1 |
| 46080360 | maltooligosaccharide ABC transporter, permease protein [Listeria monocytogenes str. 4b F2365]                     | 0.01      | 0.01      | 2.451  | 1 | 0      | 0   | 1.2   |
| 46080361 | maltooligosaccharide ABC transporter, maltooligosaccharide-binding protein [Listeria monocytogenes str. 4b F2365] | 0.01      | 1E-10     | 1.491  | 1 | 5      | 1.2 | 5.2   |
| 46080362 | maltooligosaccharide ABC transporter, maltooligosaccharide-binding protein [Listeria monocytogenes str. 4b F2365] | 1E-16     | 1E-30     | 18.161 | 8 | 30.689 | 15  | 2.1.1 |
| 46080364 | transcriptional regulator, LacI family [Listeria monocytogenes str. 4b F2365]                                     | 0.01      | 1E-10     | 3.312  | 1 | 9.935  | 5   | 3.5.2 |
| 46080369 | hypothetical protein LMO2365_2167 [Listeria monocytogenes str. 4b F2365]                                          | 0.0000001 | 1E-20     | 7.661  | 4 | 18.179 | 10  | 2.1.1 |
| 46080370 | fructose-bisphosphate aldolase, class II family [Listeria monocytogenes str. 4b F2365]                            | 0.01      | 0.01      | 1.651  | 1 | 2.243  | 1   | 2.1.1 |
| 46080371 | DNA-binding/PRII domain protein [Listeria monocytogenes str. 4b F2365]                                            | 0.01      | 0.01      | 1.782  | 1 | 2.184  | 1   | 5.2   |
| 46080382 | hypothetical protein LMO2365_2181 [Listeria monocytogenes str. 4b F2365]                                          | 0.0001    | 0.0001    | 4.295  | 2 | 4.763  | 2   | 5.2   |
| 46080386 | flavodoxin [Listeria monocytogenes str. 4b F2365]                                                                 | 0.01      | 0.0001    | 1.396  | 1 | 3.601  | 2   | 1.4   |
| 46080388 | ribonucleotide-diphosphate reductase alpha subunit [Listeria monocytogenes str. 4b F2365]                         | 0.01      | 0.0001    | 1.47   | 1 | 3.707  | 2   | 2.3   |
| 46080392 | oxidoreductase, GlbA-like-MecA family [Listeria monocytogenes str. 4b F2365]                                      | 0.000001  | 0.01      | 4.934  | 1 | 1.314  | 1   | 5.2   |
| 46080393 | hypothetical protein LMO2365_2192 [Listeria monocytogenes str. 4b F2365]                                          | 0.01      | 0.01      | 3.123  | 1 | 2.432  | 1   | 5.2   |
| 46080394 | hypothetical protein LMO2365_2193 [Listeria monocytogenes str. 4b F2365]                                          | 0.01      | 0.01      | 2.479  | 1 | 0      | 0   | 5.2   |
| 46080395 | hypothetical protein LMO2365_2194 [Listeria monocytogenes str. 4b F2365]                                          | 0.01      | 0.0001    | 1.716  | 1 | 2.866  | 2   | 5.2   |
| 46080396 | oxidoreductase, GlbA-like-MecA family [Listeria monocytogenes str. 4b F2365]                                      | 0.01      | 1E-10     | 1.986  | 1 | 10.386 | 5   | 1.4   |
| 46080397 | transcriptional regulator, AraC family [Listeria monocytogenes str. 4b F2365]                                     | 0.01      | 0.01      | 1.291  | 1 | 1.481  | 1   | 7     |
| 46080403 | enoyl-(acyl-carrier-protein) reductase [Listeria monocytogenes str. 4b F2365]                                     | 0.01      | 0.01      | 2.057  | 1 | 0      | 0   | 5.2   |
| 46080406 | sigma-54 dependent transcriptional regulator [Listeria monocytogenes str. 4b F2365]                               | 0.0001    | 0.01      | 4.256  | 2 | 2.699  | 1   | 3.5.2 |
| 46080407 | GIDF domain protein [Listeria monocytogenes str. 4b F2365]                                                        | 0.01      | 0.01      | 2.045  | 1 | 2.843  | 1   | 5.2   |
| 46080414 | hypothetical protein LMO2365_2213 [Listeria monocytogenes str. 4b F2365]                                          | 0.000001  | 0.0000001 | 5.708  | 3 | 7.9    | 4   | 5.2   |
| 46080418 | iron compound ABC transporter, iron compound-binding protein [Listeria monocytogenes str. 4b F2365]               | 0.0001    | 0.0000001 | 3.367  | 2 | 7.789  | 4   | 7     |
| 46080422 | oligopeptidase F [Listeria monocytogenes str. 4b F2365]                                                           | 0.01      | 0.01      | 2.116  | 1 | 2.125  | 1   | 2.2   |
| 46080423 | CuA-like family protein [Listeria monocytogenes str. 4b F2365]                                                    | 0.0001    | 0.0001    | 3.127  | 0 | 0      | 0   | 1.1   |
| 46080424 | adaptor protein [Listeria monocytogenes str. 4b F2365]                                                            | 0.0001    | 0.000001  | 3.045  | 2 | 5.535  | 3   | 1.1   |
| 46080427 | oligopeptide ABC transporter, ATP-binding protein [Listeria monocytogenes str. 4b F2365]                          | 0.01      | 0.000001  | 1.885  | 1 | 5.691  | 3   |       |
| 46080429 | hypothetical protein LMO2365_2272 [Listeria monocytogenes str. 4b F2365]                                          | 0.01      | 0.01      | 1.338  | 1 | 2.372  | 1   | 1.2   |
| 46080432 | trypsin-like serine protease [Listeria monocytogenes str. 4b F2365]                                               | 0.0001    | 0.0001    | 3.398  | 2 | 4.261  | 2   | 3.7.2 |
| 46080433 | OmcC/Ohr family protein [Listeria monocytogenes str. 4b F2365]                                                    | 1E-10     | 0.000001  | 19.24  | 5 | 6.92   | 3   | 5.2   |
| 46080435 | beta-ketoacyl-acyl carrier protein synthase II [Listeria monocytogenes str. 4b F2365]                             | 0.000001  | 1E-18     | 11.64  | 3 | 27.939 | 9   | 2.4   |
| 46080436 | 3-oxoacyl-acyl carrier protein synthase [Listeria monocytogenes str. 4b F2365]                                    | 0.01      | 0.01      | 1.527  | 1 | 1.436  | 1   | 2.4   |
| 46080437 | N-acetylmuramoyl-L-alanine amidase, family 4 [Listeria monocytogenes str. 4b F2365]                               | 0.01      | 0.01      | 1.823  | 1 | 1.567  | 1   | 1.8   |
| 46080438 | hypothetical protein LMO2365_2237 [Listeria monocytogenes str. 4b F2365]                                          | 0.01      | 0.01      | 1.444  | 1 | 0      | 0   | 5.2   |
| 46080441 | hypothetical protein LMO2365_2240 [Listeria monocytogenes str. 4b F2365]                                          | 0.01      | 0.0001    | 2.333  | 1 | 4.801  | 2   | 5.2   |
| 46080442 | hydrolase, halocidal dehalogenase-like family [Listeria monocytogenes str. 4b F2365]                              | 1E-10     | 0.0000001 | 9.451  | 5 | 6.665  | 4   | 4.2   |
| 46080443 | acetyltransferase, GNAT family [Listeria monocytogenes str. 4b F2365]                                             | 0.01      | 0.01      | 1.431  | 1 | 1.972  | 1   | 5.2   |
| 46080444 | hypothetical protein LMO2365_2243 [Listeria monocytogenes str. 4b F2365]                                          | 0.000001  | 0.01      | 6.453  | 3 | 2.463  | 3   | 5.2   |
| 46080446 | uroporphyrinogen decarboxylase [Listeria monocytogenes str. 4b F2365]                                             | 1E-12     | 0.0001    | 12.413 | 6 | 5.465  | 2   | 5.2   |
| 46080447 | hypothetical protein LMO2365_2246 [Listeria monocytogenes str. 4b F2365]                                          | 0.01      | 0.01      | 3.192  | 1 | 1.78   | 1   | 5.2   |
| 46080449 | ABC transporter, ATP-binding protein [Listeria monocytogenes str. 4b F2365]                                       | 0.0001    | 0.000001  | 3.325  | 2 | 5.192  | 3   | 1.2   |
| 46080454 | HD domain protein [Listeria monocytogenes str. 4b F2365]                                                          | 0.000001  | 0.0001    | 3.617  | 3 | 3.147  | 7   |       |
| 46080455 | hypothetical protein LMO2365_2254 [Listeria monocytogenes str. 4b F2365]                                          | 0.000001  | 1E-10     | 5.002  | 3 | 9.954  | 5   | 5.2   |
| 46080457 | hypothetical protein LMO2365_2256 [Listeria monocytogenes str. 4b F2365]                                          | 0.0000001 | 1E-16     | 15.977 | 4 | 26.787 | 8   | 7     |
| 46080458 | hypothetical protein LMO2365_2257 [Listeria monocytogenes str. 4b F2365]                                          | 0.01      | 0.01      | 1.65   | 1 | 0      | 0   | 5.2   |
| 46080460 | hypothetical protein LMO2365_2259 [Listeria monocytogenes str. 4b F2365]                                          | 0.0001    | 0.01      | 4.652  | 1 | 1.857  | 1   | 5.2   |
| 46080463 | penicillin-binding protein [Listeria monocytogenes str. 4b F2365]                                                 | 0.000001  | 1E-10     | 6.429  | 3 | 9.029  | 5   | 1.1   |
| 46080466 | CBS domain protein [Listeria monocytogenes str. 4b F2365]                                                         | 0.01      | 0.01      | 2.141  | 1 | 1.505  | 1   | 5.2   |
| 46080468 | loli protein, putative [Listeria monocytogenes str. 4b F2365]                                                     | 0.01      | 0.01      | 2.542  | 1 | 1.893  | 1   | 5.2   |
| 46080469 | NADH oxidase, putative [Listeria monocytogenes str. 4b F2365]                                                     | 1E-12     | 1E-12     | 16.859 | 1 | 12.452 | 9   | 1.4   |
| 46080470 | hypothetical protein LMO2365_2269 [Listeria monocytogenes str. 4b F2365]                                          | 0.000001  | 0.000001  | 3.235  | 2 | 5.14   | 3   | 2.1.1 |
| 46080472 | major facilitator family transporter [Listeria monocytogenes str. 4b F2365]                                       | 0.01      | 0.01      | 1.444  | 1 | 0      | 0   | 1.2   |
| 46080473 | hypothetical protein LMO2365_2272 [Listeria monocytogenes str. 4b F2365]                                          | 0.01      | 0.000001  | 1.896  | 1 | 0      | 0   | 5.2   |
| 46080474 | ABC transporter, ATP-binding protein [Listeria monocytogenes str. 4b F2365]                                       | 0.01      | 0.0000001 | 2.463  | 1 | 7.527  | 1   | 5.2   |
| 46080475 | transcriptional regulator, GntR family [Listeria monocytogenes str. 4b F2365]                                     | 0.01      | 0.01      | 1.477  | 1 | 0      | 0   | 3.5.2 |
| 46080477 | ribosomal large subunit pseudouridine synthase, RhlA subfamily [Listeria monocytogenes str. 4b F2365]             | 0.01      | 0.01      | 2.563  | 1 | 0      | 0   | 3.6   |
| 46080479 | hypothetical protein LMO2365_2279 [Listeria monocytogenes str. 4b F2365]                                          | 0.01      | 0.01      | 2.544  | 1 | 0      | 0   | 5.2   |
| 46080480 | oxidoreductase, alcohol dehydrogenase family [Listeria monoc                                                      |           |           |        |   |        |     |       |

|          |                                                                                                        |            |            |         |    |         |    |      |
|----------|--------------------------------------------------------------------------------------------------------|------------|------------|---------|----|---------|----|------|
| 46008610 | hypothetical protein LMO2365_2410 [Listeria monocytogenes str. 4b F2365]                               | 0.000001   | 0.000001   | 4.744   | 3  | 4.935   | 3  | 5.2  |
| 46008611 | hypothetical protein LMO2365_2413 [Listeria monocytogenes str. 4b F2365]                               | 0.00001    | 0.00000001 | 2.919   | 2  | 6.951   | 4  | 3.52 |
| 46008621 | SsrA-binding protein [Listeria monocytogenes str. 4b F2365]                                            | 0.01       | 0.00000001 | 2.082   | 1  | 0       | 7  | 5.2  |
| 46008622 | ribonuclease R, putative [Listeria monocytogenes str. 4b F2365]                                        | 1E-12      | 1E-12      | 10.754  | 6  | 10.141  | 6  | 3.6  |
| 46008625 | carboxylesterase [Listeria monocytogenes str. 4b F2365]                                                | 1E-16      | 1E-18      | 15.363  | 8  | 17.079  | 9  | 2.4  |
| 46008626 | hypothetical protein LMO2365_2426 [Listeria monocytogenes str. 4b F2365]                               | 0.00001    | 1E-14      | 3.289   | 2  | 13.257  | 7  | 2.4  |
| 46008633 | transcriptional regulator, putative [Listeria monocytogenes str. 4b F2365]                             | 0.00001    | 0.00001    | 4.299   | 1  | 4.299   | 1  | 3.52 |
| 46008635 | real dipeptidase family protein [Listeria monocytogenes str. 4b F2365]                                 | 0.01       | 0.01       | 1.762   | 1  | 1.672   | 1  | 2.2  |
| 46008636 | transcriptional regulator, TetR family [Listeria monocytogenes str. 4b F2365]                          | 0.00001    | 0.000001   | 3.971   | 2  | 6.813   | 3  | 3.52 |
| 46008640 | ATP-dependent Clp protease proteolytic subunit [Listeria monocytogenes str. 4b F2365]                  | 1E-40      | 1E-38      | 81.049  | 20 | 77.254  | 19 | 4.1  |
| 46008641 | amino acid permease family protein [Listeria monocytogenes str. 4b F2365]                              | 1E-12      | 1E-10      | 9.082   | 6  | 8.161   | 5  | 1.2  |
| 46008643 | NADH flavin oxidoreductase [Listeria monocytogenes str. 4b F2365]                                      | 1E-20      | 1E-20      | 21.856  | 10 | 20.835  | 10 | 5.2  |
| 46008644 | hypothetical protein LMO2365_2445 [Listeria monocytogenes str. 4b F2365]                               | 0.01       | 0.000001   | 1.352   | 1  | 6.623   | 3  | 5.2  |
| 46008649 | UDP-glucose 4-epimerase [Listeria monocytogenes str. 4b F2365]                                         | 0.01       | 0.00000001 | 2.372   | 1  | 6.294   | 4  | 2.11 |
| 46008650 | thioredoxin-disulfide reductase [Listeria monocytogenes str. 4b F2365]                                 | 0.00001    | 0.00001    | 4.015   | 2  | 3.436   | 2  | 5.2  |
| 46008651 | TPR domain protein [Listeria monocytogenes str. 4b F2365]                                              | 0.00001    | 0.01       | 7.693   | 1  | 5.12    | 0  | 1.2  |
| 46008654 | prolipoprotein diacylglycerol transferase [Listeria monocytogenes str. 4b F2365]                       | 0.01       | 0.01       | 1.618   | 1  | 0       | 0  | 3.8  |
| 46008655 | HPr kinase/phosphorylase [Listeria monocytogenes str. 4b F2365]                                        | 0.00000001 | 0.00001    | 7.93    | 4  | 3.751   | 2  | 3.8  |
| 46008661 | oxonuclease ABC subunit B [Listeria monocytogenes str. 4b F2365]                                       | 1E-12      | 1E-16      | 13.678  | 6  | 17.088  | 8  | 3.2  |
| 46008663 | HD domain protein [Listeria monocytogenes str. 4b F2365]                                               | 1E-22      | 1E-24      | 25.538  | 11 | 31.807  | 12 | 3.52 |
| 46008664 | hypothetical protein LMO2365_2465 [Listeria monocytogenes str. 4b F2365]                               | 0.01       | 0.01       | 1.314   | 1  | 2.118   | 1  | 6    |
| 46008665 | transcriptional regulator, AraR family [Listeria monocytogenes str. 4b F2365]                          | 0.00001    | 0.00001    | 3.176   | 2  | 0       | 0  | 3.52 |
| 46008671 | phosphate ABC transporter, phosphate-binding protein [Listeria monocytogenes str. 4b F2365]            | 0.01       | 0.01       | 1.985   | 1  | 2.19    | 1  | 1.2  |
| 46008673 | DNA-binding response regulator PhoP [Listeria monocytogenes str. 4b F2365]                             | 0.01       | 0.01       | 1.584   | 1  | 0       | 0  | 3.52 |
| 46008676 | peptidase, M48 family [Listeria monocytogenes str. 4b F2365]                                           | 1E-22      | 1E-16      | 23.243  | 11 | 15.741  | 8  | 1.8  |
| 46008677 | NLP/Pe60 family protein [Listeria monocytogenes str. 4b F2365]                                         | 0.01       | 0.01       | 4.47    | 1  | 1.58    | 1  | 1.1  |
| 46008681 | peptide chain release factor 2, programmed frameshift [Listeria monocytogenes str. 4b F2365]           | 0.01       | 0.01       | 2.045   | 1  | 1.799   | 1  | 3.75 |
| 46008682 | translocase [Listeria monocytogenes str. 4b F2365]                                                     | 1E-10      | 0.000001   | 4.586   | 3  | 4.586   | 3  | 1.6  |
| 46008685 | helicase family protein [Listeria monocytogenes str. 4b F2365]                                         | 1E-14      | 1E-20      | 12.343  | 7  | 18.044  | 10 | 1.1  |
| 46008686 | DegV family protein [Listeria monocytogenes str. 4b F2365]                                             | 0.000001   | 0.00001    | 5.878   | 3  | 3.655   | 2  | 5.2  |
| 46008687 | DNA-binding response regulator DegU [Listeria monocytogenes str. 4b F2365]                             | 0.01       | 0.01       | 2.011   | 1  | 1.418   | 1  | 3.52 |
| 46008690 | transcriptional regulator, putative [Listeria monocytogenes str. 4b F2365]                             | 0.000001   | 0.000001   | 1.831   | 1  | 1.331   | 1  | 5.2  |
| 46008691 | glycosyl transferase, group 4 family protein [Listeria monocytogenes str. 4b F2365]                    | 0.00001    | 0.01       | 3.14    | 2  | 1.672   | 1  | 1.1  |
| 46008692 | N-acetylamino acid racemase [Listeria monocytogenes str. 4b F2365]                                     | 0.00001    | 0.01       | 3.485   | 2  | 1.921   | 1  | 2.5  |
| 46008693 | teichoic acid biosynthesis protein A [Listeria monocytogenes str. 4b F2365]                            | 0.00001    | 0.00001    | 3.878   | 2  | 2.715   | 2  | 1.1  |
| 46008694 | LysM domain protein [Listeria monocytogenes str. 4b F2365]                                             | 0.00001    | 0.01       | 3.396   | 2  | 2.008   | 1  | 1.1  |
| 46008697 | mit protein [Listeria monocytogenes str. 4b F2365]                                                     | 1E-10      | 1E-10      | 8.277   | 5  | 8.277   | 5  | 1.2  |
| 46008700 | ATP synthase F1, epsilon subunit [Listeria monocytogenes str. 4b F2365]                                | 0.00000001 | 1E-12      | 15.507  | 4  | 18.815  | 6  | 1.4  |
| 46008701 | ATP synthase subunit B [Listeria monocytogenes str. 4b F2365]                                          | 1E-22      | 1E-24      | 43.909  | 11 | 42.285  | 12 | 1.4  |
| 46008703 | ATP synthase subunit A [Listeria monocytogenes str. 4b F2365]                                          | 1E-14      | 1E-18      | 18.649  | 7  | 23.126  | 9  | 1.4  |
| 46008704 | ATP synthase F1, delta subunit [Listeria monocytogenes str. 4b F2365]                                  | 0.000001   | 0.01       | 7.694   | 1  | 5.12    | 0  | 1.4  |
| 46008705 | ATP synthase F0, B subunit [Listeria monocytogenes str. 4b F2365]                                      | 1E-10      | 1E-18      | 15.719  | 5  | 29.72   | 9  | 1.4  |
| 46008709 | UDP-N-acetylglucosamine 2-epimerase [Listeria monocytogenes str. 4b F2365]                             | 0.000001   | 0.000001   | 5.862   | 3  | 4.604   | 3  | 2.11 |
| 46008710 | uncell phosphotransferase [Listeria monocytogenes str. 4b F2365]                                       | 0.000001   | 0.01       | 4.385   | 3  | 1.67    | 1  | 2.3  |
| 46008711 | serine hydroxymethyltransferase [Listeria monocytogenes str. 4b F2365]                                 | 1E-10      | 1E-18      | 9.44    | 5  | 28.019  | 9  | 2.2  |
| 46008715 | peptide chain release factor 1 [Listeria monocytogenes str. 4b F2365]                                  | 0.00000001 | 0.000001   | 8.542   | 4  | 6.061   | 3  | 3.52 |
| 46008718 | threonine synthase [Listeria monocytogenes str. 4b F2365]                                              | 1E-10      | 0.000001   | 14.824  | 5  | 13.218  | 3  | 2.2  |
| 46008719 | homoserine dehydrogenase [Listeria monocytogenes str. 4b F2365]                                        | 0.00001    | 0.000001   | 3.478   | 2  | 5.135   | 3  | 2.2  |
| 46008720 | ribosomal protein L31 [Listeria monocytogenes str. 4b F2365]                                           | 0.00001    | 0.00001    | 9.584   | 1  | 5.884   | 2  | 3.71 |
| 46008724 | hypothetical protein LMO2365_2525 [Listeria monocytogenes str. 4b F2365]                               | 0.000001   | 0.00001    | 5.103   | 3  | 0       | 0  | 5.2  |
| 46008725 | glycosyl transferase CpoA [Listeria monocytogenes str. 4b F2365]                                       | 0.01       | 0.00000001 | 1.755   | 1  | 7.355   | 4  | 1.1  |
| 46008726 | glycosyl transferase, group 1 family protein [Listeria monocytogenes str. 4b F2365]                    | 0.000001   | 0.00001    | 5.757   | 3  | 4.069   | 2  | 1.1  |
| 46008729 | N-acetyluracetyl-L-alanine amidase, family 2 [Listeria monocytogenes str. 4b F2365]                    | 0.000001   | 0.000001   | 4.586   | 3  | 5.462   | 3  | 5.2  |
| 46008732 | arginyl-tRNA synthetase [Listeria monocytogenes str. 4b F2365]                                         | 0.000001   | 0.01       | 3.163   | 2  | 1.644   | 1  | 3.72 |
| 46008735 | 4-oxalacetate tautomerase [Listeria monocytogenes str. 4b F2365]                                       | 1E-14      | 1E-22      | 13.054  | 7  | 22.661  | 11 | 2.11 |
| 46008741 | bacterial extracellular solute-binding protein, family 5 [Listeria monocytogenes str. 4b F2365]        | 0.01       | 0.01       | 1.456   | 1  | 1.451   | 1  | 1.2  |
| 46008745 | alcohol dehydrogenase, zinc-dependent [Listeria monocytogenes str. 4b F2365]                           | 0.000001   | 0.01       | 5.335   | 1  | 1.478   | 1  | 1.1  |
| 46008748 | Cof-like hydrolase, HAD-superfamily, subfamily IIIb [Listeria monocytogenes str. 4b F2365]             | 0.01       | 0.01       | 2.043   | 1  | 0       | 0  | 5.2  |
| 46008753 | sensor histidine kinase [Listeria monocytogenes str. 4b F2365]                                         | 0.00000001 | 0.00001    | 7.445   | 4  | 3.879   | 2  | 1.3  |
| 46008768 | 30S ribosomal protein S9 [Listeria monocytogenes str. 4b F2365]                                        | 1E-12      | 0.00000001 | 18.596  | 6  | 13.578  | 4  | 3.71 |
| 46008769 | 30S ribosomal protein L13 [Listeria monocytogenes str. 4b F2365]                                       | 1E-18      | 1E-12      | 17.645  | 9  | 17.011  | 6  | 3.71 |
| 46008776 | hypothetical protein LMO2365_2577 [Listeria monocytogenes str. 4b F2365]                               | 0.000001   | 0.00000001 | 5.933   | 1  | 2.913   | 2  | 3.71 |
| 46008779 | 30S ribosomal protein S11 [Listeria monocytogenes str. 4b F2365]                                       | 0.000001   | 0.00001    | 1.603   | 1  | 2.913   | 2  | 3.71 |
| 46008780 | 30S ribosomal protein S13 [Listeria monocytogenes str. 4b F2365]                                       | 0.00001    | 0.01       | 4.994   | 2  | 2.104   | 1  | 3.71 |
| 46008781 | ribosomal protein L36 [Listeria monocytogenes str. 4b F2365]                                           | 0.01       | 0.01       | 1.366   | 1  | 1.415   | 1  | 3.71 |
| 46008782 | translation initiation factor IF-1 [Listeria monocytogenes str. 4b F2365]                              | 1E-12      | 1E-12      | 22.725  | 6  | 22.725  | 6  | 3.71 |
| 46008783 | adenylate kinase [Listeria monocytogenes str. 4b F2365]                                                | 1E-64      | 1E-66      | 109.177 | 32 | 112.912 | 33 | 2.3  |
| 46008788 | ribosomal protein L18 [Listeria monocytogenes str. 4b F2365]                                           | 0.01       | 0.01       | 4.453   | 1  | 0       | 0  | 3.71 |
| 46008790 | ribosomal protein S8 [Listeria monocytogenes str. 4b F2365]                                            | 0.01       | 0.01       | 1.73    | 1  | 0       | 0  | 3.71 |
| 46008791 | 30S ribosomal protein S14 [Listeria monocytogenes str. 4b F2365]                                       | 0.01       | 0.01       | 1.477   | 1  | 0       | 0  | 3.71 |
| 46008793 | 30S ribosomal protein L24 [Listeria monocytogenes str. 4b F2365]                                       | 1E-18      | 1E-30      | 43.195  | 9  | 65.894  | 15 | 2.11 |
| 46008796 | ribosomal protein L29 [Listeria monocytogenes str. 4b F2365]                                           | 1E-14      | 1E-14      | 24.59   | 7  | 22.128  | 7  | 3.71 |
| 46008799 | 30S ribosomal protein L22 [Listeria monocytogenes str. 4b F2365]                                       | 0.01       | 0.01       | 2.165   | 1  | 1.757   | 1  | 3.71 |
| 46008800 | ribosomal protein S19 [Listeria monocytogenes str. 4b F2365]                                           | 1E-12      | 1E-14      | 17.657  | 7  | 18.872  | 7  | 3.71 |
| 46008801 | 30S ribosomal protein L2 [Listeria monocytogenes str. 4b F2365]                                        | 0.01       | 0.01       | 1.585   | 1  | 1.398   | 1  | 3.71 |
| 46008804 | ribosomal protein L3 [Listeria monocytogenes str. 4b F2365]                                            | 0.01       | 0.01       | 1.411   | 1  | 0       | 0  | 3.71 |
| 46008805 | 30S ribosomal protein S10 [Listeria monocytogenes str. 4b F2365]                                       | 0.01       | 0.01       | 1.879   | 1  | 0       | 0  | 3.71 |
| 46008811 | hypothetical protein LMO2365_2617 [Listeria monocytogenes str. 4b F2365]                               | 1E-16      | 1E-16      | 14.347  | 8  | 15.496  | 8  | 5.2  |
| 46008813 | polyphenyl synthetase [Listeria monocytogenes str. 4b F2365]                                           | 0.000001   | 0.01       | 6.265   | 1  | 3.889   | 1  | 2.5  |
| 46008814 | serine-threonine protein phosphatase family protein [Listeria monocytogenes str. 4b F2365]             | 0.01       | 0.01       | 1.709   | 1  | 2.062   | 1  | 5.2  |
| 46008815 | hypothetical protein LMO2365_2616 [Listeria monocytogenes str. 4b F2365]                               | 0.00001    | 0.00001    | 3.846   | 2  | 0       | 0  | 5.2  |
| 46008819 | phosphotransferase family protein [Listeria monocytogenes str. 4b F2365]                               | 0.000001   | 0.01       | 1.627   | 1  | 0       | 0  | 2.4  |
| 46008820 | ascorbate-specific PTS system enzyme IIC [Listeria monocytogenes str. 4b F2365]                        | 0.00000001 | 0.000001   | 6.641   | 4  | 5.864   | 3  | 1.2  |
| 46008824 | PTS system, IIA component, putative [Listeria monocytogenes str. 4b F2365]                             | 1E-10      | 1E-20      | 8.409   | 5  | 16.904  | 10 | 3.52 |
| 46008831 | elongation factor Tu [Listeria monocytogenes str. 4b F2365]                                            | 1E-16      | 1E-30      | 30.775  | 8  | 47.055  | 15 | 3.74 |
| 46008834 | 30S ribosomal protein S12 [Listeria monocytogenes str. 4b F2365]                                       | 0.00001    | 0.00001    | 3.909   | 2  | 1.808   | 1  | 3.71 |
| 46008835 | deoxyguanylatephosphate triphosphohydrolase [Listeria monocytogenes str. 4b F2365]                     | 1E-12      | 1E-12      | 5.451   | 5  | 9.56    | 5  | 2.11 |
| 46008838 | ribulose-phosphate 3-epimerase [Listeria monocytogenes str. 4b F2365]                                  | 0.000001   | 0.01       | 5.464   | 3  | 2.408   | 1  | 2.11 |
| 46008839 | transketolase [Listeria monocytogenes str. 4b F2365]                                                   | 1E-10      | 0.000001   | 7.503   | 5  | 4.88    | 3  | 2.11 |
| 46008840 | ribulose-phosphate 3-epimerase family protein [Listeria monocytogenes str. 4b F2365]                   | 0.01       | 0.01       | 2.441   | 1  | 0       | 0  | 2.11 |
| 46008841 | ribose 5-phosphate isomerase B [Listeria monocytogenes str. 4b F2365]                                  | 0.000001   | 0.00001    | 1.848   | 1  | 1.848   | 1  | 2.11 |
| 46008843 | alcohol dehydrogenase, zinc-dependent [Listeria monocytogenes str. 4b F2365]                           | 0.00000001 | 0.000001   | 6.491   | 4  | 5.796   | 3  | 2.11 |
| 46008847 | PTS system IIA 2 domain protein [Listeria monocytogenes str. 4b F2365]                                 | 0.01       | 0.000001   | 1.342   | 1  | 5.043   | 3  | 3.52 |
| 46008851 | transcriptional regulator, AraC family [Listeria monocytogenes str. 4b F2365]                          | 0.01       | 0.000001   | 1.786   | 1  | 3.077   | 2  | 3.52 |
| 46008856 | hydrolase, alpha beta fold family [Listeria monocytogenes str. 4b F2365]                               | 0.01       | 0.00000001 | 1.623   | 1  | 7.434   | 1  | 2.11 |
| 46008858 | sensor histidine kinase KdpD [Listeria monocytogenes str. 4b F2365]                                    | 1E-12      | 1E-14      | 9.47    | 6  | 11.443  | 7  | 1.3  |
| 46008859 | K <sup>+</sup> -transporting ATPase, C subunit [Listeria monocytogenes str. 4b F2365]                  | 0.000001   | 0.01       | 2.258   | 1  | 1.92    | 1  | 1.2  |
| 46008861 | potassium-transporting ATPase subunit A [Listeria monocytogenes str. 4b F2365]                         | 0.01       | 0.01       | 1.437   | 1  | 0       | 0  | 1.2  |
| 46008862 | PTS system, beta-glucose-specific, IIB component [Listeria monocytogenes str. 4b F2365]                | 0.00001    | 0.01       | 3.106   | 1  | 1.275   | 1  | 1.2  |
| 46008864 | PTS system, beta-glucose-specific, IIA component [Listeria monocytogenes str. 4b F2365]                | 0.01       | 0.00001    | 3.984   | 2  | 0       | 0  | 1.2  |
| 46008867 | magnesium-translocating P-type ATPase [Listeria monocytogenes str. 4b F2365]                           | 1E-16      | 1E-16      | 15.679  | 8  | 14.94   | 8  | 1.2  |
| 46008870 | hypothetical protein LMO2365_2671 [Listeria monocytogenes str. 4b F2365]                               | 1E-12      | 1E-24      | 21.131  | 6  | 40.144  | 12 | 5.2  |
| 46008872 | Omi/yojArg deacetylase [Listeria monocytogenes str. 4b F2365]                                          | 1E-12      | 1E-10      | 18.96   | 7  | 22.246  | 10 | 2.2  |
| 46008873 | dihydroxyacetone kinase, Dsk1 subunit, putative [Listeria monocytogenes str. 4b F2365]                 | 1E-18      | 1E-16      | 34.119  | 9  | 27.276  | 8  | 2.11 |
| 46008874 | dihydroxyacetone kinase, Dsk2 subunit, putative [Listeria monocytogenes str. 4b F2365]                 | 0.000001   | 0.01       | 10.542  | 3  | 1.49    | 1  | 2.11 |
| 46008876 | phosphogluconate-binding transcriptional regulator, RpfK family [Listeria monocytogenes str. 4b F2365] | 0.000001   | 1E-16      | 5.553   | 3  | 15.754  | 8  | 3.52 |
| 46008877 | Cu-like hydrolase [Listeria monocytogenes str. 4b F2365]                                               | 0.000001   | 0.00001    | 5.2365  | 2  | 5.286   | 2  | 5.2  |
| 46008881 | recombination protein RecR [Listeria monocytogenes str. 4b F2365]                                      | 0.00001    | 0.00000001 | 4.771   | 2  | 7.927   | 4  | 3.3  |
| 46008883 | DNA polymerase III, gamma and tau subunits [Listeria monocytogenes str. 4b F2365]                      | 0.000001   | 0.00001    | 4.19    | 3  | 3.803   | 2  | 3.1  |
| 46008884 | hypothetical protein LMO2365_2685 [Listeria monocytogenes str. 4b F2365]                               | 0.00001    | 0.00001    | 3.313   | 2  | 0       | 0  | 5.2  |
| 46008886 | hypothetical protein LMO2365_2687 [Listeria monocytogenes str. 4b F2365]                               | 0.000001   | 0.00001    | 3.807   | 2  | 4.49    | 2  | 5.2  |
| 46008891 | glucanase kinase, putative [Listeria monocytogenes                                                     |            |            |         |    |         |    |      |

|                                               |                                                                                                     |             |           |        |   |        |    |      |
|-----------------------------------------------|-----------------------------------------------------------------------------------------------------|-------------|-----------|--------|---|--------|----|------|
| 46909013                                      | D-isomer specific 2-hydroxyacid dehydrogenase family protein [Listeria monocytogenes str. 4b F2365] | 0.0001      | 1E-10     | 4.373  | 2 | 8.431  | 5  | 2.11 |
| 46909016                                      | transcriptional regulator, MarR family [Listeria monocytogenes str. 4b F2365]                       | 0.0001      | 0.0001    | 3.019  | 2 | 3.404  | 2  | 3.52 |
| 46909019                                      | thioredoxin [Listeria monocytogenes str. 4b F2365]                                                  | 0.01        | 0.001     | 2.201  | 0 | 1.751  | 1  | 1.4  |
| 46909023                                      | oxidoreductase, GlcD/MecA family [Listeria monocytogenes str. 4b F2365]                             | 0.0001      | 1E-10     | 4.729  | 2 | 9.045  | 5  | 2.11 |
| 46909025                                      | alcohol dehydrogenase, zinc-dependent [Listeria monocytogenes str. 4b F2365]                        | 0.000001    | 0.01      | 6.165  | 3 | 1.583  | 1  | 2.11 |
| 46909029                                      | sucrose phosphorylase [Listeria monocytogenes str. 4b F2365]                                        | 0.0001      | 0.001     | 3.418  | 2 | 0      | 0  | 2.11 |
| 46909030                                      | transcriptional regulator, LacI family [Listeria monocytogenes str. 4b F2365]                       | 0.0001      | 0.0001    | 1.921  | 1 | 2.899  | 1  | 3.52 |
| 46909031                                      | hypothetical protein LMO2365_2833 [Listeria monocytogenes str. 4b F2365]                            | 0.01        | 0.01      | 1.793  | 1 | 2.04   | 1  | 6    |
| 46909033                                      | major facilitator family transporter [Listeria monocytogenes str. 4b F2365]                         | 0.01        | 0.001     | 2.481  | 1 | 0      | 0  | 1.2  |
| 46909035                                      | rhamnulose-1-phosphate aldolase [Listeria monocytogenes str. 4b F2365]                              | 0.01        | 0.01      | 1.543  | 1 | 1.732  | 1  | 7    |
| 46909036                                      | L-rhamnose isomerase [Listeria monocytogenes str. 4b F2365]                                         | 0.01        | 0.01      | 4.386  | 1 | 3.479  | 2  | 7    |
| 46909037                                      | rhamnulokinase [Listeria monocytogenes str. 4b F2365]                                               | 0.0000001   | 0.0001    | 7.107  | 0 | 3.492  | 2  | 7    |
| 46909039                                      | transcriptional regulator, AraC family [Listeria monocytogenes str. 4b F2365]                       | 0.01        | 1E-10     | 1.619  | 1 | 8.502  | 5  | 3.52 |
| 46909041                                      | RNA-binding protein [Listeria monocytogenes str. 4b F2365]                                          | 1E-10       | 0.000001  | 15.009 | 5 | 10.974 | 3  | 5.2  |
| 46909043                                      | ribonuclease P [Listeria monocytogenes str. 4b F2365]                                               | 0.000001    | 0.0001    | 4.096  | 3 | 2.75   | 2  | 3.6  |
| 85700164                                      | dihydrooridine synthase family protein [Listeria monocytogenes str. 4b F2365]                       | 0.0001      | 0.0000001 | 4.441  | 2 | 6.395  | 4  | 5.2  |
| <b>EGD proteins with no ortholog in F2365</b> |                                                                                                     |             |           |        |   |        |    |      |
| 16802115                                      | hypothetical protein lmo0067 [Listeria monocytog                                                    | 0.01        | 0         | 0      | 0 | 2.173  | 1  | 3.8  |
| 16802129                                      | hypothetical protein lmo0081 [Listeria monocytog                                                    | 0.0001      | 0         | 0      | 0 | 1.32   | 1  | 6    |
| 16802196                                      | hypothetical protein lmo0148 [Listeria monocytog                                                    | 0.0001      | 0         | 0      | 0 | 3.751  | 1  | 5.1  |
| 16802199                                      | hypothetical protein lmo0151 [Listeria monocytog                                                    | 0.01        | 0         | 0      | 0 | 2.175  | 1  | 6    |
| 16802299                                      | hypothetical protein lmo0253 [Listeria monocytog                                                    | 0.000001    | 0         | 0      | 0 | 5.13   | 3  | 4.2  |
| 16802301                                      | hypothetical protein lmo0255 [Listeria monocytog                                                    | 0.000001    | 0         | 0      | 0 | 3.44   | 2  | 5.2  |
| 16802353                                      | hypothetical protein lmo0307 [Listeria monocytog                                                    | 1E-10       | 0         | 0      | 0 | 9.291  | 5  | 6    |
| 16802354                                      | hypothetical protein lmo0309 [Listeria monocytogenes EGD-e]                                         | 1E-10       | 0         | 0      | 0 | 11.831 | 5  | 5.2  |
| 16802355                                      | hypothetical protein lmo0310 [Listeria monocytog                                                    | 0.0001      | 0         | 0      | 0 | 2.934  | 2  | 6    |
| 16802356                                      | hypothetical protein lmo0311 [Listeria monocytog                                                    | 0.0000001   | 0         | 0      | 0 | 9.929  | 4  | 6    |
| 16802357                                      | hypothetical protein lmo0312 [Listeria monocytogenes EGD-e]                                         | 0.000000001 | 0         | 0      | 0 | 36.637 | 10 | 5.2  |
| 16802384                                      | hypothetical protein lmo0339 [Listeria monocytog                                                    | 0.01        | 0         | 0      | 0 | 1.746  | 1  | 2.6  |
| 16802386                                      | hypothetical protein lmo0341 [Listeria monocytog                                                    | 0.01        | 0         | 0      | 0 | 2.373  | 1  | 5.2  |
| 16802402                                      | hypothetical protein lmo0357 [Listeria monocytog                                                    | 0.0001      | 0         | 0      | 0 | 4.863  | 2  | 1.2  |
| 16802403                                      | hypothetical protein lmo0358 [Listeria monocytogenes EGD-e]                                         | 0.000001    | 0         | 0      | 0 | 5.147  | 1  | 1.2  |
| 16802411                                      | hypothetical protein lmo0366 [Listeria monocytog                                                    | 0.01        | 0         | 0      | 0 | 2.265  | 1  | 1.2  |
| 16802412                                      | hypothetical protein lmo0367 [Listeria monocytog                                                    | 0.00000001  | 0         | 0      | 0 | 6.38   | 4  | 5.2  |
| 16802423                                      | hypothetical protein lmo0378 [Listeria monocytog                                                    | 0.01        | 0         | 0      | 0 | 2.504  | 1  | 6    |
| 16802444                                      | hypothetical protein lmo0399 [Listeria monocytog                                                    | 0.0001      | 1E-20     | 0      | 0 | 36.637 | 10 | 5.2  |
| 16802463                                      | hypothetical protein lmo0421 [Listeria monocytog                                                    | 0.0001      | 0         | 0      | 0 | 4.447  | 2  | 5.2  |
| 16802466                                      | lineage-specific thermal regulator protein [List                                                    | 0.0001      | 0         | 0      | 0 | 1.684  | 1  | 3.51 |
| 16802467                                      | RNA polymerase sigma C factor [Listeria monocyt                                                     | 0.01        | 0         | 0      | 0 | 1.684  | 1  | 4    |
| 16802478                                      | internalin B [Listeria monocytogenes EGD-e]                                                         | 0.00000001  | 0         | 0      | 0 | 6.901  | 1  | 1.8  |
| 16802479                                      | putative peptidoglycan bound protein [LPXTG moti                                                    | 1E-24       | 0         | 0      | 0 | 22.484 | 12 | 18   |
| 16802488                                      | hypothetical protein lmo0444 [Listeria monocytog                                                    | 1E-26       | 0         | 0      | 0 | 23.981 | 13 | 5.2  |
| 16802489                                      | hypothetical protein lmo0445 [Listeria monocytog                                                    | 0.01        | 0         | 0      | 0 | 1.868  | 1  | 3.52 |
| 16802491                                      | hypothetical protein lmo0447 [Listeria monocytog                                                    | 0.01        | 0         | 0      | 0 | 1.399  | 1  | 7    |
| 16802492                                      | hypothetical protein lmo0448 [Listeria monocytog                                                    | 0.01        | 0         | 0      | 0 | 1.57   | 1  | 1.2  |
| 16802510                                      | hypothetical protein lmo0466 [Listeria monocytog                                                    | 0.0001      | 0         | 0      | 0 | 4.082  | 2  | 6    |
| 16802514                                      | hypothetical protein lmo0470 [Listeria monocytog                                                    | 0.0001      | 0         | 0      | 0 | 2.946  | 2  | 3.2  |
| 16802516                                      | hypothetical protein lmo0472 [Listeria monocytog                                                    | 0.0001      | 0         | 0      | 0 | 3.986  | 2  | 5.1  |
| 16802520                                      | putative secreted protein [Listeria monocytogen                                                     | 0.0001      | 0         | 0      | 0 | 4.093  | 2  | 5.2  |
| 16802540                                      | hypothetical protein lmo0497 [Listeria monocytog                                                    | 0.0001      | 0         | 0      | 0 | 3.62   | 2  | 1.1  |
| 16802568                                      | hypothetical protein lmo0525 [Listeria monocytog                                                    | 1E-16       | 0         | 0      | 0 | 15.08  | 8  | 5.2  |
| 16802617                                      | hypothetical protein lmo0574 [Listeria monocytog                                                    | 1E-10       | 0         | 0      | 0 | 10.48  | 5  | 2.11 |
| 16802680                                      | hypothetical protein lmo0638 [Listeria monocytog                                                    | 0.01        | 0         | 0      | 0 | 2.23   | 1  | 6    |
| 16802713                                      | hypothetical protein lmo0671 [Listeria monocytog                                                    | 0.000001    | 0         | 0      | 0 | 5.56   | 3  | 6    |
| 16802768                                      | Hypothetical CDS [Listeria monocytogenes EGD-e                                                      | 0.01        | 0         | 0      | 0 | 1.594  | 1  | 6    |
| 16802777                                      | hypothetical protein lmo0735 [Listeria monocytog                                                    | 0.01        | 0         | 0      | 0 | 1.426  | 1  | 2.11 |
| 16802778                                      | ribose-5-phosphate isomerase B [Listeria monocyst                                                   | 1E-16       | 0         | 0      | 0 | 12.903 | 8  | 1.2  |
| 16802780                                      | hypothetical protein lmo0738 [Listeria monocytog                                                    | 0.01        | 0         | 0      | 0 | 1.643  | 1  | 1.2  |
| 16802792                                      | hypothetical protein lmo0750 [Listeria monocytog                                                    | 0.01        | 0         | 0      | 0 | 1.61   | 1  | 6    |
| 16802807                                      | hypothetical protein lmo0765 [Listeria monocytog                                                    | 1E-16       | 0         | 0      | 0 | 13.73  | 8  | 5.2  |
| 16802810                                      | hypothetical protein lmo0768 [Listeria monocytog                                                    | 0.0001      | 0         | 0      | 0 | 3.937  | 2  | 1.2  |
| 16802812                                      | hypothetical protein lmo0770 [Listeria monocytog                                                    | 0.00000001  | 0         | 0      | 0 | 6.557  | 4  | 3.52 |
| 16802822                                      | hypothetical protein lmo0780 [Listeria monocytog                                                    | 0.0001      | 0         | 0      | 0 | 2.948  | 2  | 6    |
| 16802826                                      | hypothetical protein lmo0784 [Listeria monocytog                                                    | 0.0001      | 0         | 0      | 0 | 4.682  | 2  | 1.2  |
| 16802843                                      | hypothetical protein lmo0801 [Listeria monocytog                                                    | 1E-12       | 0         | 0      | 0 | 11.982 | 6  | 1.8  |
| 16802857                                      | hypothetical protein lmo0815 [Listeria monocytogenes EGD-e]                                         | 1E-10       | 0         | 0      | 0 | 9.781  | 5  | 3.52 |
| 16802858                                      | hypothetical protein lmo0816 [Listeria monocytogenes EGD-e]                                         | 0.01        | 0         | 0      | 0 | 1.577  | 1  | 3.52 |
| 16802869                                      | hypothetical protein lmo0827 [Listeria monocytog                                                    | 0.01        | 0         | 0      | 0 | 1.888  | 1  | 4.4  |
| 16802870                                      | hypothetical protein lmo0828 [Listeria monocytog                                                    | 0.01        | 0         | 0      | 0 | 1.666  | 1  | 4.4  |
| 16802929                                      | hypothetical protein lmo0888 [Listeria monocytog                                                    | 0.01        | 0         | 0      | 0 | 3.304  | 1  | 5.2  |
| 16802974                                      | hypothetical protein lmo0934 [Listeria monocytog                                                    | 0.0001      | 0         | 0      | 0 | 3.127  | 2  | 5.2  |
| 16802980                                      | hypothetical protein lmo0940 [Listeria monocytog                                                    | 0.0001      | 0         | 0      | 0 | 3.051  | 2  | 5.2  |
| 16803027                                      | hypothetical protein lmo0987 [Listeria monocytog                                                    | 0.01        | 0         | 0      | 0 | 1.665  | 1  | 5.2  |
| 16803100                                      | hypothetical protein lmo1060 [Listeria monocytogenes EGD-e]                                         | 0.01        | 0         | 0      | 0 | 1.236  | 1  | 3.52 |
| 16803101                                      | hypothetical protein lmo1061 [Listeria monocytogenes EGD-e]                                         | 0.000001    | 0         | 0      | 0 | 4.896  | 3  | 1.3  |
| 16803102                                      | hypothetical protein lmo1062 [Listeria monocytog                                                    | 1E-12       | 0         | 0      | 0 | 13.03  | 6  | 1.2  |
| 16803103                                      | hypothetical protein lmo1063 [Listeria monocytog                                                    | 0.0001      | 0         | 0      | 0 | 3.869  | 2  | 1.2  |
| 16803117                                      | hypothetical protein lmo1077 [Listeria monocytog                                                    | 1E-24       | 0         | 0      | 0 | 18.045 | 12 | 1.1  |
| 16803119                                      | hypothetical protein lmo1079 [Listeria monocytog                                                    | 1E-12       | 0         | 0      | 0 | 10.561 | 6  | 5.2  |
| 16803120                                      | hypothetical protein lmo1080 [Listeria monocytog                                                    | 1E-10       | 0         | 0      | 0 | 12.178 | 5  | 1.1  |
| 16803121                                      | hypothetical protein lmo1081 [Listeria monocytog                                                    | 0.0001      | 0         | 0      | 0 | 4.125  | 2  | 1.1  |
| 16803122                                      | hypothetical protein lmo1082 [Listeria monocytog                                                    | 0.01        | 0         | 0      | 0 | 1.564  | 1  | 1.1  |
| 16803124                                      | hypothetical protein lmo1084 [Listeria monocytog                                                    | 0.01        | 0         | 0      | 0 | 1.503  | 1  | 1.1  |
| 16803131                                      | hypothetical protein lmo1091 [Listeria monocytog                                                    | 0.0001      | 0         | 0      | 0 | 3.259  | 2  | 1.1  |
| 16803137                                      | hypothetical protein lmo1097 [Listeria monocytog                                                    | 0.000001    | 0         | 0      | 0 | 4.914  | 3  | 4.4  |
| 16803140                                      | cadmium resistance protein [Listeria monocytogen                                                    | 0.01        | 0         | 0      | 0 | 1.457  | 1  | 1.2  |
| 16803142                                      | hypothetical protein lmo1102 [Listeria monocytog                                                    | 0.01        | 0         | 0      | 0 | 2.363  | 1  | 4.2  |
| 16803143                                      | hypothetical protein lmo1103 [Listeria monocytog                                                    | 0.0001      | 0         | 0      | 0 | 3.021  | 2  | 4.4  |
| 16803145                                      | hypothetical protein lmo1105 [Listeria monocytog                                                    | 0.00000001  | 0         | 0      | 0 | 4.886  | 4  | 4.4  |
| 16803148                                      | hypothetical protein lmo1108 [Listeria monocytog                                                    | 1E-12       | 0         | 0      | 0 | 13.149 | 6  | 4.4  |
| 16803151                                      | hypothetical protein lmo1111 [Listeria monocytogenes EGD-e]                                         | 0.0001      | 0         | 0      | 0 | 1.987  | 1  | 4.4  |
| 16803152                                      | hypothetical protein lmo1112 [Listeria monocytog                                                    | 0.01        | 0         | 0      | 0 | 1.987  | 1  | 4.4  |
| 16803153                                      | hypothetical protein lmo1113 [Listeria monocytog                                                    | 0.000001    | 0         | 0      | 0 | 4.467  | 3  | 4.4  |
| 16803154                                      | hypothetical protein lmo1114 [Listeria monocytog                                                    | 0.01        | 0         | 0      | 0 | 1.723  | 1  | 4.4  |
| 16803155                                      | hypothetical protein lmo1115 [Listeria monocytog                                                    | 0.01        | 0         | 0      | 0 | 1.663  | 1  | 1.8  |
| 16803158                                      | hypothetical protein lmo1118 [Listeria monocytog                                                    | 0.01        | 0         | 0      | 0 | 1.552  | 1  | 6    |
| 16803347                                      | hypothetical protein lmo1307 [Listeria monocytog                                                    | 1E-10       | 0         | 0      | 0 | 11.324 | 5  | 6    |
| 16803657                                      | hypothetical protein lmo1617 [Listeria monocytog                                                    | 0.01        | 0         | 0      | 0 | 1.797  | 1  | 1.2  |
| 16803757                                      | hypothetical protein lmo1717 [Listeria monocytogenes EGD-e]                                         | 1E-12       | 0         | 0      | 0 | 10.144 | 6  | 5.2  |
| 16803761                                      | hypothetical protein lmo1721 [Listeria monocytog                                                    | 1E-12       | 0         | 0      | 0 | 9.282  | 6  | 3.52 |
| 16804007                                      | hypothetical protein lmo1968 [Listeria monocytog                                                    | 0.01        | 0         | 0      | 0 | 2.083  | 1  | 2.2  |
| 16804008                                      | hypothetical protein lmo1969 [Listeria monocytog                                                    | 0.01        | 0         | 0      | 0 | 1.577  | 1  | 2.11 |
| 16804011                                      | hypothetical protein lmo1972 [Listeria monocytog                                                    | 0.0001      | 0         | 0      | 0 | 4.409  | 1  | 1.2  |
| 16804019                                      | hypothetical protein lmo1980 [Listeria monocytog                                                    | 0.01        | 0         | 0      | 0 | 2.218  | 1  | 6    |
| 16804124                                      | putative peptidoglycan bound protein [LPXTG moti                                                    | 0.00000001  | 0         | 0      | 0 | 7.869  | 4  | 1.8  |
| 16804175                                      | hypothetical protein lmo2136 [Listeria monocytog                                                    | 0.01        | 0         | 0      | 0 | 1.542  | 1  | 1.2  |
| 16804281                                      | hypothetical protein lmo2242 [Listeria monocytog                                                    | 0.000001    | 0         | 0      | 0 | 5.846  | 3  | 3.6  |
| 16804310                                      | hypothetical protein lmo2271 [Listeria monocytog                                                    | 1E-10       | 0         | 0      | 0 | 9.436  | 5  | 6    |
| 16804311                                      | hypothetical protein lmo2272 [Listeria monocytog                                                    | 0.01        | 0         | 0      | 0 | 2.046  | 1  | 5.2  |
| 16804312                                      | protein gp30 [Bacteriophage A118] [Listeria mono                                                    | 1E-12       | 0         | 0      | 0 | 11.674 | 6  | 4.3  |
| 16804314                                      | Portein gp28 [Bacteriophage A118] [Listeria mono                                                    | 0.0001      | 0         | 0      | 0 | 3.99   | 2  | 4.3  |
| 16804315                                      | hypothetical protein lmo2276 [Listeria monocytog                                                    | 0.01        | 0         | 0      | 0 | 1.758  | 1  | 4.3  |
| 16804316                                      | hypothetical protein lmo2277 [Listeria monocytog                                                    | 0.01        | 0         | 0      | 0 | 1.403  | 1  | 6    |
| 16804317                                      | L-alanoyl-D-glutamate peptidase [Listeria monocy                                                    | 0.0001      | 0         | 0      | 0 | 4.872  | 2  | 2.2  |
| 16804319                                      | protein gp23 [Bacteriophage A118] [Listeria mono                                                    | 0.01        | 0         | 0      | 0 | 2.615  | 1  | 4.3  |
| 16804321                                      | protein gp21 [Bacteriophage A118] [Listeria mono                                                    | 0.01        | 0         | 0      | 0 | 2.338  | 1  | 4.3  |
| 16804322                                      | protein gp20 [Bacteriophage A118] [Listeria mono                                                    | 0.01        | 0         | 0      | 0 | 1.597  | 1  | 4.3  |
| 16804324                                      | Protein gp18 [Bacteriophage A118] [Listeria mono                                                    | 0.01        | 0         | 0      | 0 | 1.532  | 1  | 4.3  |
| 16804325                                      | Protein gp17 [Bacteriophage A118] [Listeria monoc                                                   | 0.01        | 0         | 0      | 0 | 1.972  | 1  | 4.3  |
| 16804326                                      | putative tape-measure [Bacteriophage A118] [List                                                    | 1E-42       | 0         | 0      | 0 | 38.224 | 21 | 4.3  |
| 16804328                                      | Protein gp14 [Bacteriophage A118] [Listeria mono                                                    | 0.01        | 0         | 0      | 0 | 2.09   | 1  | 4.3  |
| 16804330                                      | major tail shaft protein [Bacteriophage A118] [L                                                    | 0.01        | 0         | 0      | 0 | 1.623  | 1  | 4.3  |
| 16804331                                      | Portein gp11 [Bacteriophage A118] [Listeria monoc                                                   | 0.01        | 0         | 0      | 0 | 1.487  | 1  | 4.3  |
| 16804334                                      | Protein gp8 [Bacteriophage A118] [Listeria monoc                                                    | 0.01        | 0         | 0      | 0 | 2.222  | 1  | 4.3  |
| 16804335                                      | hypothetical protein lmo2296 [Listeria monocytog                                                    | 0.01        | 0         | 0      | 0 | 2.008  | 1  | 4.3  |
| 16804337                                      | Protein gp4 [Bacteriophage A118] [Listeria monoc                                                    | 0.00000001  | 0         | 0      | 0 | 5.874  | 4  | 4.3  |
| 16804338                                      | putative portal protein [Bacteriophage A118] [Listeria monocytogenes EGD-e]                         | 0.01        | 0         | 0      | 0 | 1.939  | 1  | 4.3  |
| 16804339                                      | putative terminase large subunit from Bacterioph                                                    | 0.000001    | 0         | 0      | 0 | 4.804  | 3  | 4.3  |
| 16804340                                      | hypothetical protein lmo2301 [Listeria monocytog                                                    | 0.01        | 0         | 0      | 0 | 1.785  | 1  | 4.3  |
| 16804343                                      | Bacteriophage A118 gp65 protein [Listeria monocy                                                    | 1E-10       | 0         | 0      | 0 | 7.324  | 5  | 4.3  |
| 16804344                                      | hypothetical protein lmo2305 [Listeria monocytog                                                    | 0.000001    | 0         | 0      | 0 | 5.023  | 3  | 6    |
| 16804345                                      | hypothetical protein lmo2306 [Listeria monocytog                                                    | 0.000001    | 0         | 0      | 0 | 5.846  |    |      |

|                                        |                                                                                                             |            |        |   |       |   |       |
|----------------------------------------|-------------------------------------------------------------------------------------------------------------|------------|--------|---|-------|---|-------|
| 16804844                               | hypothetical protein lmo2807 [Listeria monocytog                                                            | 0.01       | 0      | 0 | 1.57  | 1 | 5.1   |
| 16804846                               | hypothetical protein lmo2809 [Listeria monocytog                                                            | 0.000001   | 0      | 0 | 6.422 | 3 | 5.1   |
| F2366 proteins with no ortholog in EGD |                                                                                                             |            |        |   |       |   |       |
| 46906255                               | hypothetical protein LMO2365_0032 [Listeria monocytogenes str. 4b F2365]                                    | 0.01       | 1.994  | 1 | 0     | 0 | 7     |
| 46906257                               | hypothetical protein LMO2365_0035 [Listeria monocytogenes str. 4b F2365]                                    | 0.01       | 1.781  | 1 | 0     | 0 | 7     |
| 46906259                               | hypothetical protein LMO2365_0037 [Listeria monocytogenes str. 4b F2365]                                    | 0.000001   | 5.628  | 3 | 0     | 0 | 7     |
| 46906302                               | hypothetical protein LMO2365_0080 [Listeria monocytogenes str. 4b F2365]                                    | 0.000001   | 5.371  | 3 | 0     | 0 | 7     |
| 46906303                               | hypothetical protein LMO2365_0081 [Listeria monocytogenes str. 4b F2365]                                    | 0.01       | 1.761  | 1 | 0     | 0 | 7     |
| 46906304                               | hypothetical protein LMO2365_0082 [Listeria monocytogenes str. 4b F2365]                                    | 0.0001     | 3.604  | 2 | 0     | 0 | 7     |
| 46906306                               | hypothetical protein LMO2365_0084 [Listeria monocytogenes str. 4b F2365]                                    | 0.000001   | 6.101  | 3 | 0     | 0 | 7     |
| 46906319                               | hypothetical protein LMO2365_0097 [Listeria monocytogenes str. 4b F2365]                                    | 1E-10      | 8.63   | 5 | 0     | 0 | 7     |
| 46906320                               | hypothetical protein LMO2365_0098 [Listeria monocytogenes str. 4b F2365]                                    | 0.01       | 1.492  | 1 | 0     | 0 | 7     |
| 46906340                               | hypothetical protein LMO2365_0118 [Listeria monocytogenes str. 4b F2365]                                    | 0.00000001 | 9.082  | 4 | 0     | 0 | 7     |
| 46906487                               | transcriptional regulator, DegA family [Listeria monocytogenes str. 4b F2365]                               | 1E-18      | 18.311 | 9 | 0     | 0 | 3.5.2 |
| 46906488                               | sugar ABC transporter, sugar-binding protein [Listeria monocytogenes str. 4b F2365]                         | 0.00000001 | 8.927  | 4 | 0     | 0 | 1.2   |
| 46906489                               | sugar ABC transporter, permease protein [Listeria monocytogenes str. 4b F2365]                              | 0.01       | 1.833  | 1 | 0     | 0 | 3.5.2 |
| 46906491                               | oligo-1,6-glucosidase [Listeria monocytogenes str. 4b F2365]                                                | 1E-10      | 8.481  | 5 | 0     | 0 | 2.1.1 |
| 46906492                               | sucrose phosphorylase [Listeria monocytogenes str. 4b F2365]                                                | 0.01       | 1.59   | 1 | 0     | 0 | 2.1.1 |
| 46906500                               | ABC transporter, ATP-binding protein, putative [Listeria monocytogenes str. 4b F2365]                       | 0.000001   | 5.665  | 3 | 0     | 0 | 1.2   |
| 46906545                               | type II restriction enzyme SmaAI, putative [Listeria monocytogenes str. 4b F2365]                           | 0.0001     | 4.525  | 2 | 0     | 0 | 7     |
| 46906547                               | C-5 cytosine-specific DNA methylase family protein [Listeria monocytogenes str. 4b F2365]                   | 0.0001     | 3.072  | 2 | 0     | 0 | 3.6   |
| 46906548                               | hypothetical protein LMO2365_0328 [Listeria monocytogenes str. 4b F2365]                                    | 0.000001   | 4.564  | 3 | 0     | 0 | 7     |
| 46906569                               | cell wall surface anchor family protein [Listeria monocytogenes str. 4b F2365]                              | 0.000001   | 5.574  | 3 | 0     | 0 | 1.8   |
| 46906633                               | transcriptional regulator, GntR family [Listeria monocytogenes str. 4b F2365]                               | 0.01       | 2.187  | 1 | 0     | 0 | 3.5.2 |
| 46906635                               | ABC transporter, ATP-binding protein [Listeria monocytogenes str. 4b F2365]                                 | 0.01       | 1.777  | 1 | 0     | 0 | 1.2   |
| 46906636                               | ABC transporter, permease protein, putative [Listeria monocytogenes str. 4b F2365]                          | 0.0001     | 3.796  | 2 | 0     | 0 | 1.2   |
| 46906667                               | hypothetical protein LMO2365_0449 [Listeria monocytogenes str. 4b F2365]                                    | 0.0001     | 3.406  | 2 | 0     | 0 | 7     |
| 46906668                               | wall-associated protein, putative [Listeria monocytogenes str. 4b F2365]                                    | 1E-10      | 8.207  | 5 | 0     | 0 | 1.2   |
| 46906670                               | hypothetical protein LMO2365_0452 [Listeria monocytogenes str. 4b F2365]                                    | 0.000001   | 6.317  | 3 | 0     | 0 | 7     |
| 46906681                               | hypothetical protein LMO2365_0463 [Listeria monocytogenes str. 4b F2365]                                    | 0.01       | 1.653  | 1 | 0     | 0 | 7     |
| 46906684                               | hypothetical protein LMO2365_0466 [Listeria monocytogenes str. 4b F2365]                                    | 0.01       | 1.976  | 1 | 0     | 0 | 7     |
| 46906685                               | hypothetical protein LMO2365_0467 [Listeria monocytogenes str. 4b F2365]                                    | 0.000001   | 5.287  | 3 | 0     | 0 | 7     |
| 46906687                               | hypothetical protein LMO2365_0469 [Listeria monocytogenes str. 4b F2365]                                    | 0.01       | 2.244  | 1 | 0     | 0 | 7     |
| 46906709                               | hypothetical protein LMO2365_0492 [Listeria monocytogenes str. 4b F2365]                                    | 0.01       | 2.344  | 1 | 0     | 0 | 7     |
| 46906718                               | hypothetical protein LMO2365_0501 [Listeria monocytogenes str. 4b F2365]                                    | 0.01       | 1.446  | 1 | 0     | 0 | 7     |
| 46906722                               | hypothetical protein LMO2365_0505 [Listeria monocytogenes str. 4b F2365]                                    | 0.01       | 1.46   | 1 | 0     | 0 | 7     |
| 46906770                               | hypothetical protein LMO2365_0554 [Listeria monocytogenes str. 4b F2365]                                    | 0.01       | 2.026  | 1 | 0     | 0 | 7     |
| 46906819                               | glycosyl hydrolase, family 1 [Listeria monocytogenes str. 4b F2365]                                         | 0.000001   | 6.941  | 3 | 0     | 0 | 2.2   |
| 46906843                               | BioY family protein [Listeria monocytogenes str. 4b F2365]                                                  | 0.01       | 2.409  | 1 | 0     | 0 | 2.5   |
| 46906885                               | hypothetical protein LMO2365_0667 [Listeria monocytogenes str. 4b F2365]                                    | 0.0001     | 3.418  | 2 | 0     | 0 | 7     |
| 46906902                               | hypothetical protein LMO2365_0687 [Listeria monocytogenes str. 4b F2365]                                    | 0.01       | 1.469  | 1 | 0     | 0 | 7     |
| 46906908                               | cell wall surface anchor family protein [Listeria monocytogenes str. 4b F2365]                              | 0.01       | 2.332  | 1 | 0     | 0 | 1.8   |
| 46907046                               | hypothetical protein LMO2365_0832 [Listeria monocytogenes str. 4b F2365]                                    | 0.01       | 1.928  | 1 | 0     | 0 | 7     |
| 46907049                               | hypothetical protein LMO2365_0835 [Listeria monocytogenes str. 4b F2365]                                    | 0.01       | 2.033  | 1 | 0     | 0 | 7     |
| 46907068                               | ABC transporter, ATP-binding protein [Listeria monocytogenes str. 4b F2365]                                 | 0.0001     | 3.772  | 2 | 0     | 0 | 1.2   |
| 46907167                               | delchyl-phosphate-mannose-protein mannosyltransferase family protein [Listeria monocytogenes str. 4b F2365] | 0.000001   | 5.915  | 3 | 0     | 0 | 7     |
| 46907309                               | hypothetical protein LMO2365_1098 [Listeria monocytogenes str. 4b F2365]                                    | 0.01       | 1.561  | 1 | 0     | 0 | 7     |
| 46907313                               | glycosyl transferase, group 2 family protein [Listeria monocytogenes str. 4b F2365]                         | 0.01       | 2.287  | 1 | 0     | 0 | 1.1   |
| 46907314                               | isochoric acid biosynthesis domain protein [Listeria monocytogenes str. 4b F2365]                           | 0.01       | 1.688  | 1 | 0     | 0 | 1.1   |
| 46907329                               | hypothetical protein LMO2365_1118 [Listeria monocytogenes str. 4b F2365]                                    | 0.0001     | 3.227  | 2 | 0     | 0 | 7     |
| 46907335                               | hypothetical protein LMO2365_1125 [Listeria monocytogenes str. 4b F2365]                                    | 0.0001     | 3.485  | 2 | 0     | 0 | 7     |
| 46907352                               | hypothetical protein LMO2365_1142 [Listeria monocytogenes str. 4b F2365]                                    | 0.01       | 1.611  | 1 | 0     | 0 | 7     |
| 46907353                               | hypothetical protein LMO2365_1143 [Listeria monocytogenes str. 4b F2365]                                    | 0.0001     | 3.096  | 2 | 0     | 0 | 7     |
| 46907461                               | hypothetical protein LMO2365_1252 [Listeria monocytogenes str. 4b F2365]                                    | 0.01       | 1.859  | 1 | 0     | 0 | 7     |
| 46907463                               | cell wall surface anchor family protein [Listeria monocytogenes str. 4b F2365]                              | 0.01       | 1.616  | 1 | 0     | 0 | 1.8   |
| 46907475                               | hypothetical protein LMO2365_1266 [Listeria monocytogenes str. 4b F2365]                                    | 1E-18      | 19.85  | 9 | 0     | 0 | 7     |
| 46907494                               | hypothetical protein LMO2365_1285 [Listeria monocytogenes str. 4b F2365]                                    | 0.0001     | 2.936  | 2 | 0     | 0 | 7     |
| 46907888                               | PTS system, sucrose-specific, IIBC component [Listeria monocytogenes str. 4b F2365]                         | 1E-12      | 14.004 | 6 | 0     | 0 | 1.2   |
| 46907889                               | hypothetical protein LMO2365_1682 [Listeria monocytogenes str. 4b F2365]                                    | 0.0001     | 3.492  | 2 | 0     | 0 | 7     |
| 46907890                               | phosphosugar-binding transcriptional regulator, RpiR family [Listeria monocytogenes str. 4b F2365]          | 0.01       | 2.098  | 1 | 0     | 0 | 3.5.2 |
| 46908016                               | hypothetical protein LMO2365_1811 [Listeria monocytogenes str. 4b F2365]                                    | 0.01       | 1.509  | 1 | 0     | 0 | 7     |
| 46908103                               | serine protease, putative [Listeria monocytogenes str. 4b F2365]                                            | 0.01       | 1.917  | 1 | 0     | 0 | 4.1   |
| 46908178                               | cell wall surface anchor family protein [Listeria monocytogenes str. 4b F2365]                              | 0.00000001 | 7.525  | 4 | 0     | 0 | 1.8   |
| 46908260                               | hypothetical protein LMO2365_2056 [Listeria monocytogenes str. 4b F2365]                                    | 0.0001     | 3.785  | 2 | 0     | 0 | 7     |
| 46908261                               | hypothetical protein LMO2365_2057 [Listeria monocytogenes str. 4b F2365]                                    | 0.01       | 1.378  | 1 | 0     | 0 | 7     |
| 46908282                               | methyltransferase, putative [Listeria monocytogenes str. 4b F2365]                                          | 0.01       | 1.747  | 1 | 0     | 0 | 3.6   |
| 46908263                               | transcriptional regulator, TetR family [Listeria monocytogenes str. 4b F2365]                               | 0.01       | 1.873  | 1 | 0     | 0 | 3.5.2 |
| 46908411                               | cell wall surface anchor family protein [Listeria monocytogenes str. 4b F2365]                              | 1E-10      | 8.808  | 5 | 0     | 0 | 1.8   |
| 46908547                               | hypothetical protein LMO2365_2347 [Listeria monocytogenes str. 4b F2365]                                    | 0.01       | 1.518  | 1 | 0     | 0 | 7     |
| 46908561                               | hypothetical protein LMO2365_2361 [Listeria monocytogenes str. 4b F2365]                                    | 0.0001     | 3.235  | 2 | 0     | 0 | 7     |
| 46908738                               | hypothetical protein LMO2365_2539 [Listeria monocytogenes str. 4b F2365]                                    | 0.0001     | 4.058  | 2 | 0     | 0 | 7     |
| 46908816                               | hypothetical protein LMO2365_2617 [Listeria monocytogenes str. 4b F2365]                                    | 1E-12      | 14.755 | 6 | 0     | 0 | 7     |
| 46908825                               | hypothetical protein LMO2365_2626 [Listeria monocytogenes str. 4b F2365]                                    | 0.01       | 1.461  | 1 | 0     | 0 | 1.2   |
| 46908837                               | cell wall surface anchor family protein [Listeria monocytogenes str. 4b F2365]                              | 0.01       | 1.831  | 1 | 0     | 0 | 1.8   |
| 46908900                               | hypothetical protein LMO2365_2701 [Listeria monocytogenes str. 4b F2365]                                    | 0.0001     | 2.992  | 2 | 0     | 0 | 7     |
| 46908902                               | hypothetical protein LMO2365_2703 [Listeria monocytogenes str. 4b F2365]                                    | 0.000001   | 5.498  | 3 | 0     | 0 | 7     |
| 46908906                               | hypothetical protein LMO2365_2707 [Listeria monocytogenes str. 4b F2365]                                    | 0.0001     | 3.131  | 2 | 0     | 0 | 7     |
| 46908939                               | hypothetical protein LMO2365_2740 [Listeria monocytogenes str. 4b F2365]                                    | 0.01       | 1.539  | 1 | 0     | 0 | 7     |
| 46908990                               | hypothetical protein LMO2365_2791 [Listeria monocytogenes str. 4b F2365]                                    | 0.01       | 1.492  | 1 | 0     | 0 | 7     |
| 46908991                               | hypothetical protein LMO2365_2792 [Listeria monocytogenes str. 4b F2365]                                    | 0.01       | 1.554  | 1 | 0     | 0 | 7     |
| 46908995                               | hypothetical protein LMO2365_2796 [Listeria monocytogenes str. 4b F2365]                                    | 0.01       | 2.06   | 1 | 0     | 0 | 7     |
| 46908998                               | DNA-binding protein [Listeria monocytogenes str. 4b F2365]                                                  | 0.01       | 2.788  | 1 | 0     | 0 | 5.2   |
